# Supplementary material for: Remote N–H activation of indole aldehydes: an investigation of the mechanism, origin of selectivities, and role of the catalyst
Source: Royal Society of Chemistry journal article supplement (doi:10.1039/d1nj05500c), 2022-01-01
Supplement: d1nj05500c1.pdf [file d1nj05500c1.pdf]

## Supporting Information

### **Remote N-H Activation of Indole Aldehyde: An Investigation on Mechanism, Origin of Selectivities, and Role of the Catalyst**

Abhijit Shyam, Amit K. Pradhan, and Paritosh Mondal<sup>\*[a]</sup>

<sup>[a]</sup> Department of Chemistry

Assam University, Silchar-788011, Assam, India

\* Email: paritos\_au@yahoo.co.in

### Content

|              |                                                                                                                                                                                                         |       |               |
|--------------|---------------------------------------------------------------------------------------------------------------------------------------------------------------------------------------------------------|-------|---------------|
| <b>SI 1.</b> | Generation of Active Catalyst NHC                                                                                                                                                                       | ..... | <b>S1</b>     |
| <b>SI 2.</b> | Computational Equation for the Calculation of Enantiomeric Excess (ee)                                                                                                                                  | ..... | <b>S1-S2</b>  |
| <b>SI 3.</b> | Lowest Energy Geometries of Some Stationery Points Optimised at M06-2X/6-31G(d,p)//IEF-PCM <sub>DCM</sub> Level of Theory                                                                               | ..... | <b>S2-S3</b>  |
| <b>SI 4.</b> | Absolute Energies of All the DFT Optimized Stationary Points Involved in this Mechanistic Investigation                                                                                                 | ..... | <b>S3-S4</b>  |
| <b>SI 5.</b> | Cartesian Co-ordinates of All the Optimized Stationary Points Involved in the NHC catalysed N-H activation of indole aldehyde, Evaluated at M06-2X/6-31G(d,p)//IEF-PCM <sub>(DCM)</sub> Level of Theory | ..... | <b>S4-S44</b> |

## SI 1. Generation of Active Catalyst NHC

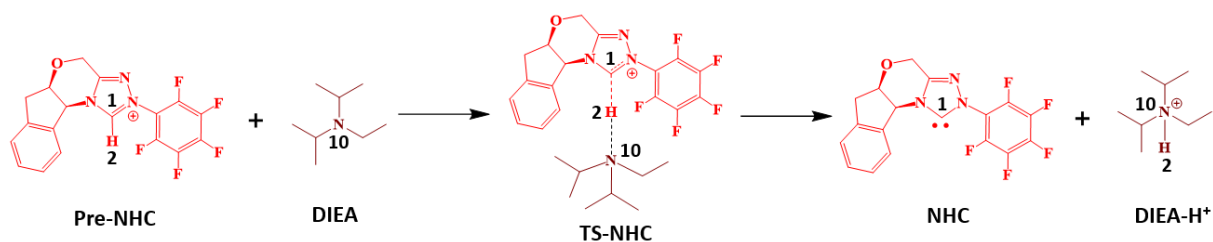

**Scheme S1.** Schematic representation for the generation of NHC in presence of DIEA.

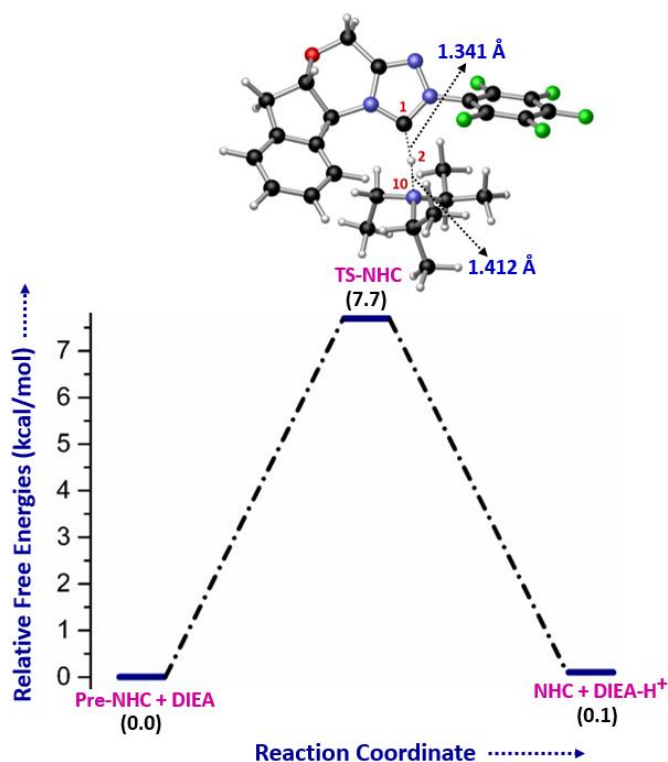

**Figure S1.** The relative free energy plot for the generation of active catalyst NHC.

## SI 2. Computational Equation for the Calculation of Enantiomeric Excess (ee)

The reported enantiomeric excess (ee) value has been calculated by adopting the following mentioned Boltzmann distribution equation:

$$\frac{[Si-TS7]}{[Re-TS7]} = \frac{e^{-G_{[Re-TS7]}^{\ddagger}/RT}}{e^{-G_{[Si-TS7]}^{\ddagger}/RT}} = e^{\Delta G^{\ddagger}/RT} \quad [1]$$

$$ee\% = \frac{[Si-TS7] - [Re-TS7]}{[Si-TS7] + [Re-TS7]} \times 100\% = \frac{\frac{[Si-TS7]}{[Re-TS7]} - 1}{\frac{[Si-TS7]}{[Re-TS7]} + 1} \times 100\% \quad [2]$$

The  $\Delta G^{\ddagger}$  used in the above equation is the relative Gibb's free energy difference between the two stereo-selective transition states, *Si-TS7* and *Re-TS7*.

The **Figure 6** in the main text reflects that the relative Gibbs free energy barriers for the two competing stereo-selective transition states, *Si-TS7* and *Re-TS7* are 21.5 and 26.8 kcal/mol, respectively. Thus, the value of  $\Delta G^{\ddagger}$  is evaluated to be 5.3 kcal/mol (22175.2 J/mol). Knowing

the value of  $\Delta G^\ddagger$  and using the **Eq-1**, the energy ratio  $\frac{[Si-TS7]}{[Re-TS7]}$  of the two competing stereoselective transition states has been evaluated to be 7676.14. This in turn gives an enantiomeric excess (ee %) value of 99.9%, which is in close proximity to the experimentally determined value.

### SI 3. Lowest Energy Geometries of Some Stationery Points Optimised at M06-2X/6-31G(d,p)//IEF-PCM<sub>DCM</sub> Level of Theory

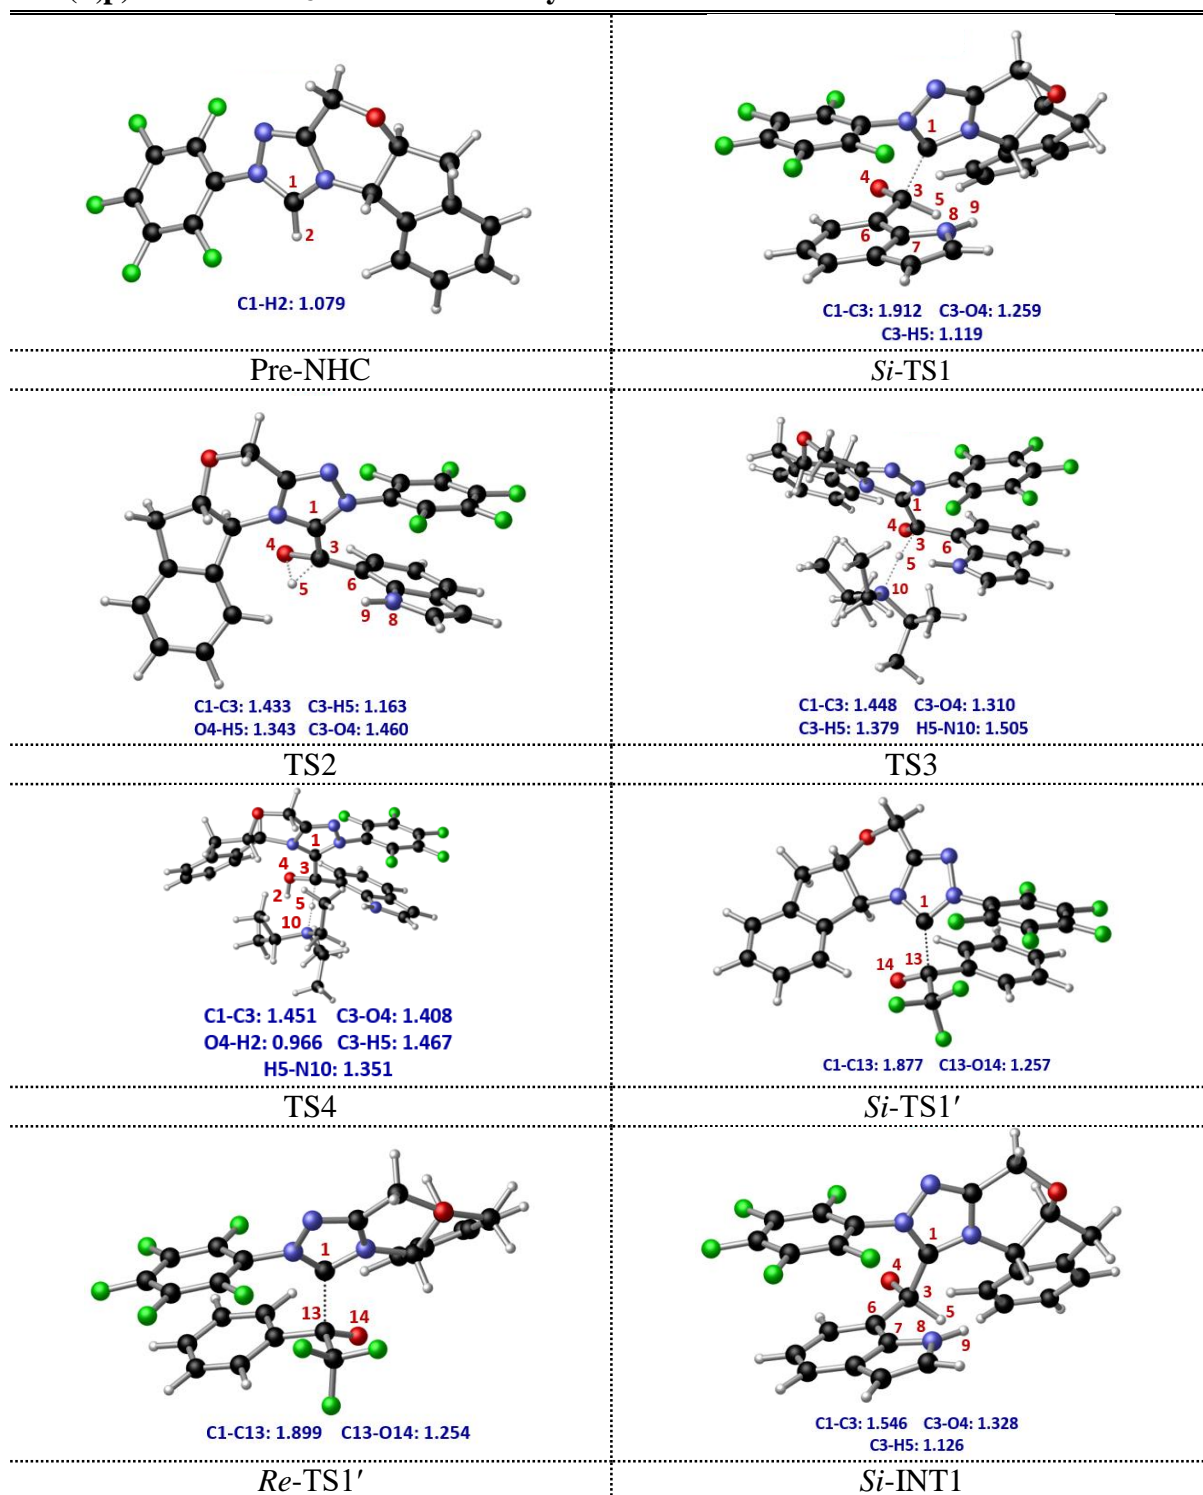

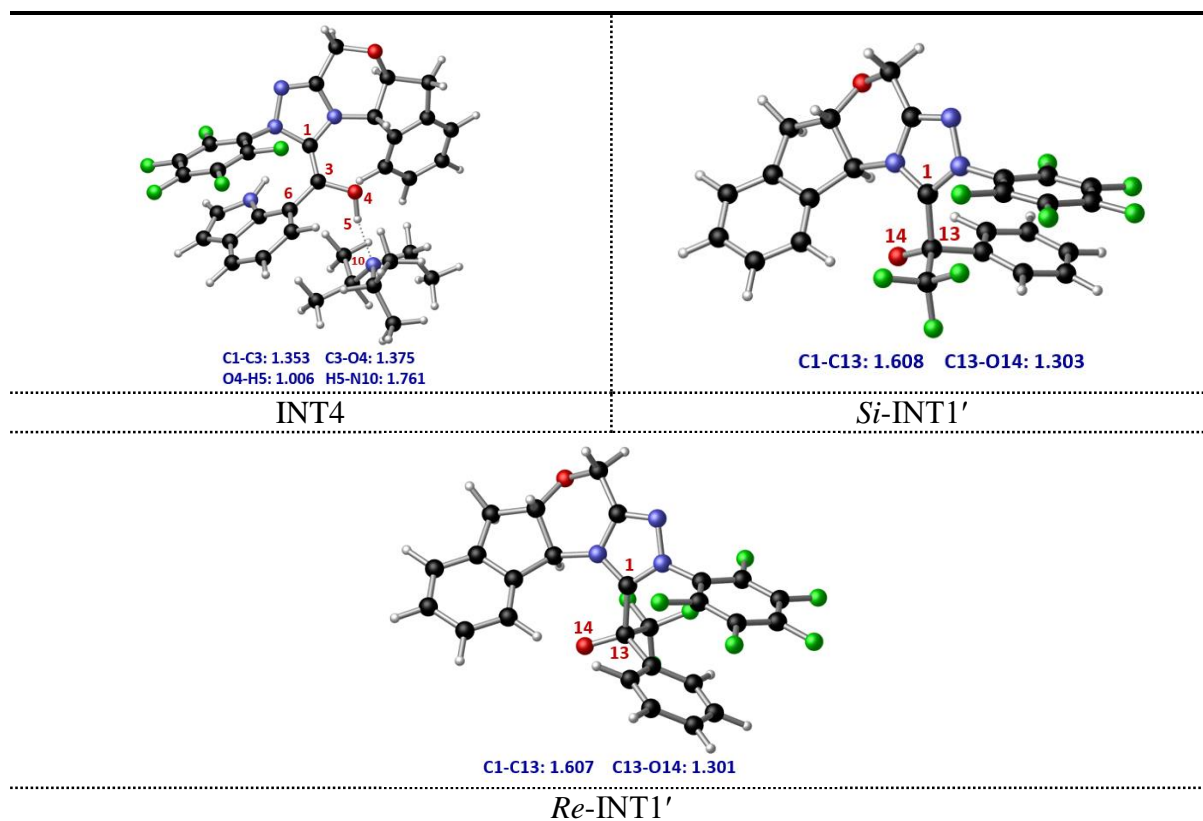

**Figure S2.** DFT optimized geometries of some stationary points along with their bond distances (unit: Å).

#### SI 4. Absolute Energies of All the DFT Optimized Stationary Points Involved in this Mechanistic Investigation

**Table S1.** DFT derived energies  $E_1$  and  $E_2$  of all the optimised stationary points involved in this work, obtained at M06-2X/6-31G(d,p)//IEF-PCM<sub>(DCM)</sub> ( $L_1$ ) and M06-2X/6-311++G(2df,2pd)//IEF-PCM<sub>(DCM)</sub> ( $L_2$ ) levels, respectively at 298.15 K temperature

| Stationary Point    | $E_1$           | $E_2$          |
|---------------------|-----------------|----------------|
| Pre-NHC             | -1430.44998318  | -1430.93793924 |
| TS-NHC              | -1801.32467079  | -1801.91820155 |
| NHC                 | -1429.98908408  | -1430.48459587 |
| R1                  | -476.962674250  | -477.114914724 |
| R2                  | -682.364253323  | -682.606994919 |
| DIEA                | -370.859431171  | -370.970195353 |
| DIEA-H <sup>+</sup> | -371.318012517  | -371.424441435 |
| DQ                  | -1240.997333330 | -1241.36431308 |
| DQ-H <sup>-</sup>   | -1241.74658753  | -1242.12421132 |
| Si-TS1              | -1906.95311604  | -1907.59811203 |
| Re-TS1              | -1906.95802416  | -1907.60347936 |

|                  |                 |                |
|------------------|-----------------|----------------|
| TS2              | -1906.88685893  | -1907.53574395 |
| TS3              | -2277.79049749  | -2278.53786126 |
| TS4              | -2278.27417074  | -2279.01407946 |
| TS5              | -2,649.16550214 | -2650.00967589 |
| TS6              | -3147.96660380  | -3148.97147047 |
| TS7              | -2277.10177886  | -2277.83963596 |
| <i>Re</i> -TS8   | -2588.13203096  | -2589.00908927 |
| <i>Si</i> -TS8   | -2588.13887503  | -2589.01731060 |
| <i>Re</i> -TS9   | -2588.17043383  | -2589.04367256 |
| <i>Si</i> -TS9   | -2588.17000558  | -2589.04347604 |
| <i>Si</i> -INT1  | -1906.96023891  | -1907.60739512 |
| <i>Re</i> -INT1  | -1906.96134041  | -1907.60813042 |
| INT2             | -1906.97792255  | -1907.62245671 |
| INT3             | -2278.32746150  | -2279.06948126 |
| INT4             | -2277.87440761  | -2278.62600844 |
| INT5             | -1906.22521313  | -1906.85869536 |
| INT6             | -1905.75726876  | -1906.39965017 |
| <i>Re</i> -INT7  | -2588.17970127  | -2589.05324527 |
| <i>Si</i> -INT7  | -2588.17931240  | -2589.05210428 |
| <i>R</i> -P      | -1158.16615557  | -1158.55142893 |
| <i>S</i> -P      | -1158.16521162  | -1158.55135873 |
| <i>Si</i> -TS1'  | -2112.36201697  | -2113.09485783 |
| <i>Re</i> -TS1'  | -2112.36054637  | -2113.09435946 |
| <i>Si</i> -INT1' | -2112.36426747  | -2113.09806106 |
| <i>Re</i> -INT1' | -2112.36332095  | -2113.09831897 |

**SI 5. Cartesian Co-ordinates of All the Optimized Stationary Points Involved in the NHC catalysed N-H activation of indole aldehyde, Evaluated at M06-2X/6-31G(d,p)//IEF-PCM<sub>(DCM)</sub> Level of Theory**

**Pre-NHC**

| Center Number | Atomic Number | Atomic Type | Coordinates (Angstroms) |           |           |
|---------------|---------------|-------------|-------------------------|-----------|-----------|
|               |               |             | X                       | Y         | Z         |
| 1             | 6             | 0           | -0.542715               | -0.405649 | -1.801447 |
| 2             | 6             | 0           | -0.471064               | 1.737287  | -2.176126 |

|    |   |   |           |           |           |
|----|---|---|-----------|-----------|-----------|
| 3  | 7 | 0 | -0.498890 | 1.188374  | -3.356147 |
| 4  | 7 | 0 | -0.492645 | 0.773749  | -1.189337 |
| 5  | 7 | 0 | -0.537739 | -0.147560 | -3.105022 |
| 6  | 6 | 0 | -0.361414 | 3.214546  | -1.869926 |
| 7  | 1 | 0 | -1.131205 | 3.754164  | -2.422890 |
| 8  | 1 | 0 | 0.625764  | 3.552508  | -2.211932 |
| 9  | 8 | 0 | -0.538730 | 3.483919  | -0.492879 |
| 10 | 6 | 0 | 0.163958  | 2.541662  | 0.280188  |
| 11 | 1 | 0 | 1.179142  | 2.404264  | -0.126135 |
| 12 | 6 | 0 | -0.545561 | 1.183915  | 0.223592  |
| 13 | 1 | 0 | -1.608066 | 1.321922  | 0.458340  |
| 14 | 6 | 0 | 0.278468  | 2.796475  | 1.777644  |
| 15 | 1 | 0 | 1.053263  | 3.521422  | 2.029832  |
| 16 | 1 | 0 | -0.679476 | 3.152669  | 2.174788  |
| 17 | 6 | 0 | 0.584360  | 1.386294  | 2.252265  |
| 18 | 6 | 0 | 0.153232  | 0.425759  | 1.321060  |
| 19 | 6 | 0 | 1.205351  | 0.983836  | 3.425805  |
| 20 | 1 | 0 | 1.549342  | 1.718319  | 4.147134  |
| 21 | 6 | 0 | 0.322240  | -0.931159 | 1.554591  |
| 22 | 1 | 0 | -0.027977 | -1.683522 | 0.855816  |
| 23 | 6 | 0 | 1.392238  | -0.379775 | 3.657544  |
| 24 | 1 | 0 | 1.883075  | -0.706628 | 4.568206  |
| 25 | 6 | 0 | 0.958081  | -1.327193 | 2.732193  |
| 26 | 1 | 0 | 1.110404  | -2.382881 | 2.928399  |
| 27 | 6 | 0 | -0.595234 | -1.078954 | -4.171615 |
| 28 | 6 | 0 | -1.534219 | -2.105870 | -4.149137 |
| 29 | 6 | 0 | 0.271727  | -0.954654 | -5.254388 |
| 30 | 6 | 0 | -1.608458 | -3.010129 | -5.196726 |
| 31 | 6 | 0 | 0.189266  | -1.848651 | -6.311525 |
| 32 | 6 | 0 | -0.747432 | -2.875032 | -6.279290 |
| 33 | 9 | 0 | 1.180274  | 0.005835  | -5.280388 |
| 34 | 9 | 0 | 1.012688  | -1.735457 | -7.342792 |
| 35 | 9 | 0 | -0.816041 | -3.732191 | -7.282411 |
| 36 | 9 | 0 | -2.499619 | -3.989457 | -5.171956 |
| 37 | 9 | 0 | -2.355522 | -2.225052 | -3.112343 |
| 38 | 1 | 0 | -0.582907 | -1.384864 | -1.349134 |

-----  
**TS-NHC**  
 -----

| Center<br>Number | Atomic<br>Number | Atomic<br>Type | Coordinates (Angstroms) |           |           |
|------------------|------------------|----------------|-------------------------|-----------|-----------|
|                  |                  |                | X                       | Y         | Z         |
| 1                | 6                | 0              | -0.391591               | -3.002401 | -2.148227 |
| 2                | 6                | 0              | -1.096856               | -0.909220 | -2.387314 |
| 3                | 7                | 0              | -1.048020               | -1.374943 | -3.598230 |
| 4                | 7                | 0              | -0.669826               | -1.862700 | -1.484488 |
| 5                | 7                | 0              | -0.605360               | -2.657062 | -3.426272 |
| 6                | 6                | 0              | -1.551595               | 0.471213  | -1.967857 |
| 7                | 1                | 0              | -2.504045               | 0.693113  | -2.450560 |
| 8                | 1                | 0              | -0.803965               | 1.202395  | -2.301951 |
| 9                | 8                | 0              | -1.740065               | 0.552240  | -0.565864 |
| 10               | 6                | 0              | -0.627850               | -0.019992 | 0.074240  |
| 11               | 1                | 0              | 0.296942                | 0.336018  | -0.408489 |
| 12               | 6                | 0              | -0.656203               | -1.546827 | -0.057838 |
| 13               | 1                | 0              | -1.597211               | -1.918548 | 0.368766  |
| 14               | 6                | 0              | -0.468047               | 0.162495  | 1.582779  |
| 15               | 1                | 0              | -0.116916               | 1.156074  | 1.863543  |
| 16               | 1                | 0              | -1.420010               | -0.033202 | 2.090824  |
| 17               | 6                | 0              | 0.553148                | -0.935514 | 1.842368  |
| 18               | 6                | 0              | 0.506952                | -1.906658 | 0.827902  |
| 19               | 6                | 0              | 1.505767                | -1.036136 | 2.846178  |

|    |   |   |           |           |           |
|----|---|---|-----------|-----------|-----------|
| 20 | 1 | 0 | 1.561486  | -0.289760 | 3.632454  |
| 21 | 6 | 0 | 1.426483  | -2.939317 | 0.771008  |
| 22 | 1 | 0 | 1.423146  | -3.645876 | -0.051874 |
| 23 | 6 | 0 | 2.414017  | -2.098375 | 2.813878  |
| 24 | 1 | 0 | 3.166051  | -2.182935 | 3.591236  |
| 25 | 6 | 0 | 2.387169  | -3.031934 | 1.780109  |
| 26 | 1 | 0 | 3.120501  | -3.831069 | 1.750517  |
| 27 | 6 | 0 | -0.345138 | -3.466463 | -4.555971 |
| 28 | 6 | 0 | -1.382088 | -3.861360 | -5.395166 |
| 29 | 6 | 0 | 0.958179  | -3.870642 | -4.829731 |
| 30 | 6 | 0 | -1.125250 | -4.683406 | -6.482275 |
| 31 | 6 | 0 | 1.222394  | -4.697818 | -5.911390 |
| 32 | 6 | 0 | 0.177717  | -5.097503 | -6.737189 |
| 33 | 9 | 0 | 1.950166  | -3.491951 | -4.033725 |
| 34 | 9 | 0 | 2.460298  | -5.094936 | -6.166510 |
| 35 | 9 | 0 | 0.424746  | -5.883276 | -7.771084 |
| 36 | 9 | 0 | -2.111727 | -5.076880 | -7.274482 |
| 37 | 9 | 0 | -2.624056 | -3.479578 | -5.135215 |
| 38 | 1 | 0 | -0.343415 | -4.270046 | -1.712452 |
| 39 | 6 | 0 | -1.464928 | -4.969911 | -0.004691 |
| 40 | 1 | 0 | -2.214388 | -4.307868 | -0.449008 |
| 41 | 6 | 0 | 0.609764  | -6.172582 | -0.606630 |
| 42 | 1 | 0 | 0.786037  | -5.683834 | 0.357764  |
| 43 | 6 | 0 | 1.820797  | -5.867820 | -1.493984 |
| 44 | 1 | 0 | 1.868494  | -4.814563 | -1.786238 |
| 45 | 1 | 0 | 2.733130  | -6.101061 | -0.938255 |
| 46 | 1 | 0 | 1.829611  | -6.465930 | -2.407071 |
| 47 | 6 | 0 | 0.502377  | -7.672957 | -0.322483 |
| 48 | 1 | 0 | 1.398533  | -7.977744 | 0.223803  |
| 49 | 1 | 0 | -0.363869 | -7.923959 | 0.290872  |
| 50 | 1 | 0 | 0.459588  | -8.269174 | -1.235840 |
| 51 | 6 | 0 | -1.465014 | -6.362930 | -2.058016 |
| 52 | 1 | 0 | -1.763608 | -7.269406 | -1.517444 |
| 53 | 6 | 0 | -2.734890 | -5.626519 | -2.491647 |
| 54 | 1 | 0 | -3.229326 | -6.206239 | -3.273861 |
| 55 | 1 | 0 | -3.452214 | -5.498685 | -1.679041 |
| 56 | 1 | 0 | -2.508622 | -4.639264 | -2.908516 |
| 57 | 6 | 0 | -0.672931 | -6.787164 | -3.294036 |
| 58 | 1 | 0 | -0.237253 | -5.922765 | -3.799470 |
| 59 | 1 | 0 | 0.129853  | -7.487986 | -3.071413 |
| 60 | 1 | 0 | -1.350652 | -7.280962 | -3.994328 |
| 61 | 7 | 0 | -0.647233 | -5.517731 | -1.125123 |
| 62 | 6 | 0 | -2.142960 | -5.971836 | 0.921312  |
| 63 | 1 | 0 | -2.768067 | -6.683827 | 0.375724  |
| 64 | 1 | 0 | -1.416524 | -6.527400 | 1.517319  |
| 65 | 1 | 0 | -2.787985 | -5.424851 | 1.612701  |
| 66 | 1 | 0 | -0.795083 | -4.333228 | 0.582315  |

-----  
**NHC**  
 -----

| Center<br>Number | Atomic<br>Number | Atomic<br>Type | Coordinates (Angstroms) |           |           |
|------------------|------------------|----------------|-------------------------|-----------|-----------|
|                  |                  |                | X                       | Y         | Z         |
| 1                | 6                | 0              | -0.580398               | -0.469657 | -1.728985 |
| 2                | 6                | 0              | -0.505558               | 1.754360  | -2.176825 |
| 3                | 7                | 0              | -0.544878               | 1.208565  | -3.350138 |
| 4                | 7                | 0              | -0.513493               | 0.782690  | -1.195219 |
| 5                | 7                | 0              | -0.585046               | -0.141267 | -3.046856 |
| 6                | 6                | 0              | -0.389288               | 3.231157  | -1.872832 |
| 7                | 1                | 0              | -1.157924               | 3.782890  | -2.415973 |
| 8                | 1                | 0              | 0.596476                | 3.575037  | -2.215036 |

|    |   |   |           |           |           |
|----|---|---|-----------|-----------|-----------|
| 9  | 8 | 0 | -0.553740 | 3.513658  | -0.490430 |
| 10 | 6 | 0 | 0.144597  | 2.559821  | 0.276321  |
| 11 | 1 | 0 | 1.163219  | 2.433414  | -0.127399 |
| 12 | 6 | 0 | -0.553321 | 1.201717  | 0.194144  |
| 13 | 1 | 0 | -1.607021 | 1.343066  | 0.473745  |
| 14 | 6 | 0 | 0.251340  | 2.797296  | 1.780089  |
| 15 | 1 | 0 | 1.012608  | 3.530128  | 2.052902  |
| 16 | 1 | 0 | -0.715309 | 3.133605  | 2.175484  |
| 17 | 6 | 0 | 0.575455  | 1.382223  | 2.234239  |
| 18 | 6 | 0 | 0.157382  | 0.440338  | 1.278921  |
| 19 | 6 | 0 | 1.215142  | 0.957898  | 3.390153  |
| 20 | 1 | 0 | 1.553147  | 1.675466  | 4.131889  |
| 21 | 6 | 0 | 0.371957  | -0.917948 | 1.455140  |
| 22 | 1 | 0 | 0.049108  | -1.623014 | 0.696545  |
| 23 | 6 | 0 | 1.434480  | -0.409502 | 3.575469  |
| 24 | 1 | 0 | 1.940026  | -0.753516 | 4.472238  |
| 25 | 6 | 0 | 1.022874  | -1.335959 | 2.618296  |
| 26 | 1 | 0 | 1.211364  | -2.392649 | 2.777882  |
| 27 | 6 | 0 | -0.629075 | -1.064680 | -4.109925 |
| 28 | 6 | 0 | -1.615800 | -2.045935 | -4.164409 |
| 29 | 6 | 0 | 0.316023  | -1.011099 | -5.131781 |
| 30 | 6 | 0 | -1.650790 | -2.960085 | -5.208288 |
| 31 | 6 | 0 | 0.275663  | -1.909065 | -6.188169 |
| 32 | 6 | 0 | -0.707218 | -2.888244 | -6.223307 |
| 33 | 9 | 0 | 1.283377  | -0.101844 | -5.102514 |
| 34 | 9 | 0 | 1.186462  | -1.846600 | -7.154954 |
| 35 | 9 | 0 | -0.744424 | -3.756515 | -7.226831 |
| 36 | 9 | 0 | -2.598405 | -3.892097 | -5.248532 |
| 37 | 9 | 0 | -2.549616 | -2.117744 | -3.223943 |

## R1

| Center Number | Atomic Number | Atomic Type | Coordinates (Angstroms) |           |           |
|---------------|---------------|-------------|-------------------------|-----------|-----------|
|               |               |             | X                       | Y         | Z         |
| 1             | 6             | 0           | -3.909814               | 0.681585  | -0.710207 |
| 2             | 6             | 0           | -4.130308               | 1.870479  | 0.035243  |
| 3             | 6             | 0           | -5.432556               | 2.187151  | 0.442479  |
| 4             | 6             | 0           | -6.480371               | 1.336497  | 0.111223  |
| 5             | 6             | 0           | -6.248154               | 0.168341  | -0.623098 |
| 6             | 6             | 0           | -4.968215               | -0.183757 | -1.047313 |
| 7             | 1             | 0           | -5.619413               | 3.092679  | 1.012034  |
| 8             | 1             | 0           | -7.490129               | 1.579000  | 0.424028  |
| 9             | 1             | 0           | -7.067061               | -0.495402 | -0.881356 |
| 10            | 6             | 0           | -2.852255               | 2.505513  | 0.197873  |
| 11            | 1             | 0           | -2.647668               | 3.431030  | 0.714256  |
| 12            | 6             | 0           | -1.937356               | 1.712255  | -0.429805 |
| 13            | 1             | 0           | -0.869690               | 1.831742  | -0.539787 |
| 14            | 7             | 0           | -2.568101               | 0.614152  | -0.977757 |
| 15            | 1             | 0           | -2.096828               | -0.113945 | -1.490430 |
| 16            | 6             | 0           | -4.755736               | -1.419998 | -1.816767 |
| 17            | 1             | 0           | -3.710280               | -1.631665 | -2.117120 |
| 18            | 8             | 0           | -5.641259               | -2.191667 | -2.126316 |

## R2

| Center Number | Atomic Number | Atomic Type | Coordinates (Angstroms) |           |           |
|---------------|---------------|-------------|-------------------------|-----------|-----------|
|               |               |             | X                       | Y         | Z         |
| 1             | 6             | 0           | -2.672062               | -2.285930 | -0.010843 |
| 2             | 6             | 0           | -1.272148               | -2.293651 | 0.005947  |



|    |   |   |           |           |           |
|----|---|---|-----------|-----------|-----------|
| 3  | 6 | 0 | -0.563512 | -1.086093 | 0.011390  |
| 4  | 6 | 0 | -1.247640 | 0.120647  | 0.000283  |
| 5  | 6 | 0 | -2.643084 | 0.126465  | -0.016504 |
| 6  | 6 | 0 | -3.351766 | -1.072968 | -0.022064 |
| 7  | 1 | 0 | -3.233118 | -3.212886 | -0.015249 |
| 8  | 1 | 0 | 0.520741  | -1.116913 | 0.024614  |
| 9  | 1 | 0 | -0.698543 | 1.055895  | 0.004688  |
| 10 | 1 | 0 | -3.179626 | 1.069716  | -0.025384 |
| 11 | 1 | 0 | -4.436057 | -1.064302 | -0.035272 |
| 12 | 6 | 0 | -0.478652 | -3.544224 | 0.018779  |
| 13 | 8 | 0 | 0.729067  | -3.586199 | 0.032096  |
| 14 | 6 | 0 | -1.244011 | -4.888162 | 0.015861  |
| 15 | 9 | 0 | -0.403152 | -5.914098 | 0.028918  |
| 16 | 9 | 0 | -2.039984 | -4.982132 | 1.089921  |
| 17 | 9 | 0 | -2.017094 | -4.990678 | -1.073995 |

### DIEA

| Center Number | Atomic Number | Atomic Type | Coordinates (Angstroms) |           |           |
|---------------|---------------|-------------|-------------------------|-----------|-----------|
|               |               |             | X                       | Y         | Z         |
| 1             | 6             | 0           | -0.357194               | 1.636393  | -0.851499 |
| 2             | 1             | 0           | -0.249669               | 2.557219  | -0.260085 |
| 3             | 1             | 0           | -1.247586               | 1.793949  | -1.466548 |
| 4             | 6             | 0           | 0.862230                | 1.458703  | -1.747567 |
| 5             | 1             | 0           | 0.730992                | 0.585682  | -2.393214 |
| 6             | 1             | 0           | 1.028945                | 2.339465  | -2.375112 |
| 7             | 1             | 0           | 1.759849                | 1.294642  | -1.142747 |
| 8             | 6             | 0           | 0.001791                | 0.774652  | 1.368856  |
| 9             | 1             | 0           | 0.882364                | 1.392415  | 1.150894  |
| 10            | 6             | 0           | 0.557669                | -0.446813 | 2.108300  |
| 11            | 1             | 0           | 1.106076                | -1.085341 | 1.410869  |
| 12            | 1             | 0           | 1.249071                | -0.111376 | 2.887640  |
| 13            | 1             | 0           | -0.213291               | -1.046866 | 2.593724  |
| 14            | 6             | 0           | -0.918640               | 1.617636  | 2.261148  |
| 15            | 1             | 0           | -0.386329               | 1.932637  | 3.163544  |
| 16            | 1             | 0           | -1.258404               | 2.517388  | 1.738783  |
| 17            | 1             | 0           | -1.803663               | 1.058197  | 2.576397  |
| 18            | 6             | 0           | -1.909881               | -0.076919 | -0.070101 |
| 19            | 1             | 0           | -2.664274               | 0.713661  | 0.108309  |
| 20            | 6             | 0           | -2.118462               | -0.637969 | -1.481978 |
| 21            | 1             | 0           | -3.136940               | -1.022006 | -1.588527 |
| 22            | 1             | 0           | -1.959461               | 0.102812  | -2.268187 |
| 23            | 1             | 0           | -1.416012               | -1.461300 | -1.647096 |
| 24            | 6             | 0           | -2.183500               | -1.216400 | 0.910898  |
| 25            | 1             | 0           | -1.426995               | -1.999729 | 0.800872  |
| 26            | 1             | 0           | -2.204224               | -0.895192 | 1.952415  |
| 27            | 1             | 0           | -3.160242               | -1.652251 | 0.682907  |
| 28            | 7             | 0           | -0.547762               | 0.473034  | 0.031524  |

### DIEA-H<sup>+</sup>

| Center Number | Atomic Number | Atomic Type | Coordinates (Angstroms) |          |           |
|---------------|---------------|-------------|-------------------------|----------|-----------|
|               |               |             | X                       | Y        | Z         |
| 1             | 6             | 0           | -0.337726               | 1.640421 | -0.897772 |
| 2             | 1             | 0           | -0.297315               | 2.519898 | -0.255687 |
| 3             | 1             | 0           | -1.218447               | 1.735820 | -1.528183 |
| 4             | 6             | 0           | 0.925026                | 1.492581 | -1.725031 |
| 5             | 1             | 0           | 0.852981                | 0.639880 | -2.405926 |
| 6             | 1             | 0           | 1.066845                | 2.393337 | -2.324172 |

|    |   |   |           |           |           |
|----|---|---|-----------|-----------|-----------|
| 7  | 1 | 0 | 1.809110  | 1.367497  | -1.093180 |
| 8  | 6 | 0 | 0.042669  | 0.779384  | 1.399087  |
| 9  | 1 | 0 | 0.903953  | 1.405214  | 1.147569  |
| 10 | 6 | 0 | 0.584729  | -0.440801 | 2.133455  |
| 11 | 1 | 0 | 1.200396  | -1.063550 | 1.478189  |
| 12 | 1 | 0 | 1.230010  | -0.076320 | 2.935932  |
| 13 | 1 | 0 | -0.190508 | -1.057318 | 2.585171  |
| 14 | 6 | 0 | -0.938428 | 1.608144  | 2.213851  |
| 15 | 1 | 0 | -0.415698 | 1.963012  | 3.104225  |
| 16 | 1 | 0 | -1.296633 | 2.484766  | 1.668976  |
| 17 | 1 | 0 | -1.799894 | 1.026373  | 2.544899  |
| 18 | 6 | 0 | -1.950209 | -0.113777 | -0.063791 |
| 19 | 1 | 0 | -2.595848 | 0.740774  | 0.159274  |
| 20 | 6 | 0 | -2.201916 | -0.629223 | -1.479811 |
| 21 | 1 | 0 | -3.239848 | -0.960380 | -1.541087 |
| 22 | 1 | 0 | -2.051219 | 0.115011  | -2.261551 |
| 23 | 1 | 0 | -1.564512 | -1.493978 | -1.691523 |
| 24 | 6 | 0 | -2.194261 | -1.245195 | 0.926650  |
| 25 | 1 | 0 | -1.465492 | -2.050348 | 0.792255  |
| 26 | 1 | 0 | -2.188120 | -0.924116 | 1.966263  |
| 27 | 1 | 0 | -3.183593 | -1.657317 | 0.718014  |
| 28 | 7 | 0 | -0.527595 | 0.437660  | 0.014345  |
| 29 | 1 | 0 | 0.075012  | -0.307418 | -0.354335 |

## DQ

| Center<br>Number | Atomic<br>Number | Atomic<br>Type | Coordinates (Angstroms) |           |           |
|------------------|------------------|----------------|-------------------------|-----------|-----------|
|                  |                  |                | X                       | Y         | Z         |
| 1                | 6                | 0              | -3.428851               | 2.142552  | -0.095275 |
| 2                | 6                | 0              | -3.310686               | 0.797297  | -0.118656 |
| 3                | 6                | 0              | -2.038731               | 0.098506  | -0.044701 |
| 4                | 6                | 0              | -0.846697               | 0.925759  | 0.037533  |
| 5                | 6                | 0              | -0.873024               | 2.275293  | 0.086506  |
| 6                | 6                | 0              | -2.193480               | 2.970128  | 0.039708  |
| 7                | 1                | 0              | -4.207506               | 0.206575  | -0.232623 |
| 8                | 1                | 0              | 0.110280                | 0.429674  | 0.102088  |
| 9                | 6                | 0              | -1.966490               | -1.287057 | -0.044001 |
| 10               | 6                | 0              | -0.694528               | -1.985940 | -0.117043 |
| 11               | 6                | 0              | -3.158551               | -2.114212 | 0.038859  |
| 12               | 6                | 0              | -0.576385               | -3.331169 | -0.092232 |
| 13               | 1                | 0              | 0.202318                | -1.395352 | -0.231505 |
| 14               | 6                | 0              | -3.132248               | -3.463692 | 0.089237  |
| 15               | 1                | 0              | -4.115533               | -1.618038 | 0.102700  |
| 16               | 6                | 0              | -1.811792               | -4.158589 | 0.043370  |
| 17               | 6                | 0              | -4.779033               | 2.851135  | -0.200949 |
| 18               | 6                | 0              | -4.786088               | 3.788452  | -1.424262 |
| 19               | 1                | 0              | -5.770065               | 4.260445  | -1.513017 |
| 20               | 1                | 0              | -4.031792               | 4.569521  | -1.331098 |
| 21               | 1                | 0              | -4.598558               | 3.222230  | -2.342438 |
| 22               | 6                | 0              | -5.928467               | 1.850914  | -0.370754 |
| 23               | 1                | 0              | -6.006821               | 1.170590  | 0.483699  |
| 24               | 1                | 0              | -6.870358               | 2.401692  | -0.443600 |
| 25               | 1                | 0              | -5.818876               | 1.255698  | -1.283285 |
| 26               | 6                | 0              | -5.045865               | 3.660198  | 1.083087  |
| 27               | 1                | 0              | -4.290226               | 4.430953  | 1.231427  |
| 28               | 1                | 0              | -6.027132               | 4.140776  | 1.010191  |
| 29               | 1                | 0              | -5.055494               | 3.000474  | 1.956658  |
| 30               | 6                | 0              | 0.396901                | 3.118306  | 0.200979  |
| 31               | 6                | 0              | 0.506153                | 4.064693  | -1.010106 |
| 32               | 1                | 0              | 0.528863                | 3.492143  | -1.942999 |

|    |   |   |           |           |           |
|----|---|---|-----------|-----------|-----------|
| 33 | 1 | 0 | -0.329312 | 4.763458  | -1.044965 |
| 34 | 1 | 0 | 1.437941  | 4.635556  | -0.940601 |
| 35 | 6 | 0 | 1.654658  | 2.241202  | 0.224028  |
| 36 | 1 | 0 | 2.535203  | 2.885513  | 0.297219  |
| 37 | 1 | 0 | 1.664529  | 1.565649  | 1.085673  |
| 38 | 1 | 0 | 1.752571  | 1.645264  | -0.689489 |
| 39 | 6 | 0 | 0.369853  | 3.935595  | 1.506952  |
| 40 | 1 | 0 | 0.303672  | 3.270289  | 2.373910  |
| 41 | 1 | 0 | 1.297328  | 4.511509  | 1.592425  |
| 42 | 1 | 0 | -0.472883 | 4.626179  | 1.526431  |
| 43 | 6 | 0 | -4.402198 | -4.306579 | 0.204343  |
| 44 | 6 | 0 | -5.659949 | -3.429436 | 0.226235  |
| 45 | 1 | 0 | -6.540516 | -4.073667 | 0.299879  |
| 46 | 1 | 0 | -5.670004 | -2.753026 | 1.087205  |
| 47 | 1 | 0 | -5.757653 | -2.834411 | -0.687897 |
| 48 | 6 | 0 | -4.375416 | -5.122498 | 1.511175  |
| 49 | 1 | 0 | -5.302967 | -5.698218 | 1.597126  |
| 50 | 1 | 0 | -3.532760 | -5.813157 | 1.531502  |
| 51 | 1 | 0 | -4.309281 | -4.456292 | 2.377446  |
| 52 | 6 | 0 | -4.511247 | -5.254228 | -1.005774 |
| 53 | 1 | 0 | -4.533730 | -4.682652 | -1.939271 |
| 54 | 1 | 0 | -3.675817 | -5.953076 | -1.039723 |
| 55 | 1 | 0 | -5.443086 | -5.824959 | -0.935867 |
| 56 | 6 | 0 | 0.773802  | -4.039877 | -0.196983 |
| 57 | 6 | 0 | 1.923279  | -3.039833 | -0.367506 |
| 58 | 1 | 0 | 2.001482  | -2.358694 | 0.486313  |
| 59 | 1 | 0 | 2.865176  | -3.590694 | -0.439651 |
| 60 | 1 | 0 | 1.813868  | -2.445488 | -1.280623 |
| 61 | 6 | 0 | 0.781062  | -4.978311 | -1.419437 |
| 62 | 1 | 0 | 0.026717  | -5.759262 | -1.325704 |
| 63 | 1 | 0 | 0.593740  | -4.412931 | -2.338172 |
| 64 | 1 | 0 | 1.765036  | -5.450431 | -1.507565 |
| 65 | 6 | 0 | 1.040388  | -4.847779 | 1.087835  |
| 66 | 1 | 0 | 1.049869  | -4.187267 | 1.960812  |
| 67 | 1 | 0 | 0.284711  | -5.618392 | 1.236724  |
| 68 | 1 | 0 | 2.021664  | -5.328435 | 1.015551  |
| 69 | 8 | 0 | -2.261908 | 4.193979  | 0.109954  |
| 70 | 8 | 0 | -1.743396 | -5.382373 | 0.114840  |

-----  
**DQ-H**  
 -----

| Center<br>Number | Atomic<br>Number | Atomic<br>Type | Coordinates (Angstroms) |           |           |
|------------------|------------------|----------------|-------------------------|-----------|-----------|
|                  |                  |                | X                       | Y         | Z         |
| 1                | 6                | 0              | -3.364930               | 2.203478  | -0.358883 |
| 2                | 6                | 0              | -3.246290               | 0.814105  | -0.361263 |
| 3                | 6                | 0              | -2.059685               | 0.147096  | -0.033208 |
| 4                | 6                | 0              | -0.954578               | 0.939306  | 0.292658  |
| 5                | 6                | 0              | -0.992591               | 2.335371  | 0.293464  |
| 6                | 6                | 0              | -2.217687               | 2.953566  | -0.028677 |
| 7                | 1                | 0              | -4.100005               | 0.211491  | -0.646388 |
| 8                | 1                | 0              | -0.039774               | 0.434125  | 0.576673  |
| 9                | 6                | 0              | -1.978666               | -1.329230 | -0.027269 |
| 10               | 6                | 0              | -0.787942               | -1.999464 | -0.341849 |
| 11               | 6                | 0              | -3.086600               | -2.124235 | 0.300650  |
| 12               | 6                | 0              | -0.669396               | -3.382261 | -0.336679 |
| 13               | 1                | 0              | 0.068971                | -1.396103 | -0.628751 |
| 14               | 6                | 0              | -3.046287               | -3.511399 | 0.324259  |
| 15               | 1                | 0              | -4.006762               | -1.616036 | 0.575812  |
| 16               | 6                | 0              | -1.813935               | -4.209035 | 0.002156  |
| 17               | 6                | 0              | -4.695265               | 2.887770  | -0.714393 |

|    |   |   |           |           |           |
|----|---|---|-----------|-----------|-----------|
| 18 | 6 | 0 | -4.528092 | 3.781621  | -1.956820 |
| 19 | 1 | 0 | -5.489312 | 4.242576  | -2.211202 |
| 20 | 1 | 0 | -3.798037 | 4.573133  | -1.789716 |
| 21 | 1 | 0 | -4.203593 | 3.182522  | -2.814003 |
| 22 | 6 | 0 | -5.790104 | 1.862562  | -1.040746 |
| 23 | 1 | 0 | -5.993134 | 1.198728  | -0.194337 |
| 24 | 1 | 0 | -6.716039 | 2.395394  | -1.278082 |
| 25 | 1 | 0 | -5.526735 | 1.247572  | -1.906818 |
| 26 | 6 | 0 | -5.198603 | 3.724717  | 0.476401  |
| 27 | 1 | 0 | -4.492501 | 4.510861  | 0.743901  |
| 28 | 1 | 0 | -6.157881 | 4.189233  | 0.221478  |
| 29 | 1 | 0 | -5.355364 | 3.083647  | 1.350258  |
| 30 | 6 | 0 | 0.260462  | 3.155612  | 0.654679  |
| 31 | 6 | 0 | 0.686977  | 4.050667  | -0.530095 |
| 32 | 1 | 0 | 0.961532  | 3.422533  | -1.382541 |
| 33 | 1 | 0 | -0.082933 | 4.740391  | -0.885662 |
| 34 | 1 | 0 | 1.560822  | 4.647440  | -0.249650 |
| 35 | 6 | 0 | 1.467201  | 2.253482  | 0.953793  |
| 36 | 1 | 0 | 2.332792  | 2.881737  | 1.184553  |
| 37 | 1 | 0 | 1.284445  | 1.605266  | 1.815445  |
| 38 | 1 | 0 | 1.725095  | 1.626671  | 0.095311  |
| 39 | 6 | 0 | 0.022759  | 3.983227  | 1.936578  |
| 40 | 1 | 0 | -0.182652 | 3.309688  | 2.773663  |
| 41 | 1 | 0 | 0.918759  | 4.564623  | 2.176216  |
| 42 | 1 | 0 | -0.816981 | 4.681736  | 1.884598  |
| 43 | 6 | 0 | -4.287652 | -4.332678 | 0.695985  |
| 44 | 6 | 0 | -5.502780 | -3.455144 | 1.020470  |
| 45 | 1 | 0 | -6.356296 | -4.095807 | 1.268190  |
| 46 | 1 | 0 | -5.315836 | -2.801045 | 1.879064  |
| 47 | 1 | 0 | -5.790679 | -2.828039 | 0.169641  |
| 48 | 6 | 0 | -3.994504 | -5.196947 | 1.935225  |
| 49 | 1 | 0 | -4.868718 | -5.809061 | 2.190411  |
| 50 | 1 | 0 | -3.141004 | -5.845056 | 1.736006  |
| 51 | 1 | 0 | -3.764680 | -4.559163 | 2.796394  |
| 52 | 6 | 0 | -4.676305 | -5.243722 | -0.482278 |
| 53 | 1 | 0 | -4.962698 | -4.638585 | -1.350015 |
| 54 | 1 | 0 | -3.829605 | -5.874796 | -0.752745 |
| 55 | 1 | 0 | -5.532076 | -5.875179 | -0.211852 |
| 56 | 6 | 0 | 0.657498  | -4.063238 | -0.694158 |
| 57 | 6 | 0 | 1.766199  | -3.057138 | -1.026176 |
| 58 | 1 | 0 | 1.975961  | -2.388718 | -0.183799 |
| 59 | 1 | 0 | 2.688873  | -3.599064 | -1.261321 |
| 60 | 1 | 0 | 1.509719  | -2.441026 | -1.894740 |
| 61 | 6 | 0 | 0.470987  | -4.967127 | -1.925618 |
| 62 | 1 | 0 | -0.313663 | -5.698650 | -1.733304 |
| 63 | 1 | 0 | 0.190364  | -4.365628 | -2.797705 |
| 64 | 1 | 0 | 1.406657  | -5.489728 | -2.161608 |
| 65 | 6 | 0 | 1.142836  | -4.911018 | 0.495579  |
| 66 | 1 | 0 | 1.351795  | -4.268087 | 1.358378  |
| 67 | 1 | 0 | 0.373866  | -5.633642 | 0.769374  |
| 68 | 1 | 0 | 2.068132  | -5.440790 | 0.235950  |
| 69 | 8 | 0 | -2.357920 | 4.322508  | -0.038355 |
| 70 | 8 | 0 | -1.739291 | -5.486379 | 0.016018  |
| 71 | 1 | 0 | -1.529670 | 4.735828  | 0.217978  |

-----  
**Si-TS1**  
-----

| Center<br>Number | Atomic<br>Number | Atomic<br>Type | Coordinates (Angstroms) |          |           |
|------------------|------------------|----------------|-------------------------|----------|-----------|
|                  |                  |                | X                       | Y        | Z         |
| 1                | 6                | 0              | -3.619951               | 0.562512 | -1.146932 |

|    |   |   |           |           |           |
|----|---|---|-----------|-----------|-----------|
| 2  | 6 | 0 | -3.189478 | 1.674000  | -0.380053 |
| 3  | 6 | 0 | -4.065455 | 2.226865  | 0.569569  |
| 4  | 6 | 0 | -5.319406 | 1.660225  | 0.732315  |
| 5  | 6 | 0 | -5.726865 | 0.561688  | -0.048532 |
| 6  | 6 | 0 | -4.897696 | -0.001994 | -1.004348 |
| 7  | 1 | 0 | -3.762508 | 3.085402  | 1.161337  |
| 8  | 1 | 0 | -6.007550 | 2.075496  | 1.462531  |
| 9  | 1 | 0 | -6.715836 | 0.129069  | 0.065448  |
| 10 | 6 | 0 | -1.860183 | 1.994863  | -0.820470 |
| 11 | 1 | 0 | -1.229534 | 2.791987  | -0.456108 |
| 12 | 6 | 0 | -1.540235 | 1.101507  | -1.801344 |
| 13 | 1 | 0 | -0.633914 | 0.998148  | -2.379719 |
| 14 | 7 | 0 | -2.599802 | 0.245182  | -2.015083 |
| 15 | 1 | 0 | -2.558682 | -0.570941 | -2.604234 |
| 16 | 6 | 0 | -5.402084 | -1.166347 | -1.840615 |
| 17 | 1 | 0 | -4.577268 | -1.899240 | -2.026358 |
| 18 | 8 | 0 | -6.569441 | -1.596000 | -1.647655 |
| 19 | 6 | 0 | -5.202707 | -0.409861 | -3.584990 |
| 20 | 7 | 0 | -4.659488 | -0.927740 | -4.706100 |
| 21 | 7 | 0 | -5.460747 | 0.852906  | -3.943781 |
| 22 | 6 | 0 | -4.547476 | 0.073009  | -5.656129 |
| 23 | 6 | 0 | -4.071313 | -2.242210 | -4.964287 |
| 24 | 7 | 0 | -5.051262 | 1.182393  | -5.212378 |
| 25 | 6 | 0 | -6.067197 | 1.828107  | -3.119354 |
| 26 | 6 | 0 | -3.907827 | -0.150075 | -7.005733 |
| 27 | 6 | 0 | -3.929512 | -2.385857 | -6.483913 |
| 28 | 1 | 0 | -3.061465 | -2.236178 | -4.529650 |
| 29 | 6 | 0 | -4.756196 | -3.548630 | -4.630713 |
| 30 | 6 | 0 | -5.311098 | 2.888924  | -2.634300 |
| 31 | 6 | 0 | -7.392633 | 1.685826  | -2.729121 |
| 32 | 1 | 0 | -3.236797 | 0.680451  | -7.227246 |
| 33 | 1 | 0 | -4.694401 | -0.185892 | -7.771419 |
| 34 | 8 | 0 | -3.148070 | -1.346415 | -7.019143 |
| 35 | 1 | 0 | -4.943198 | -2.342641 | -6.915433 |
| 36 | 6 | 0 | -3.414105 | -3.813350 | -6.622723 |
| 37 | 6 | 0 | -4.283837 | -4.482596 | -5.572192 |
| 38 | 6 | 0 | -5.645143 | -3.915239 | -3.629865 |
| 39 | 6 | 0 | -5.873958 | 3.805546  | -1.761303 |
| 40 | 9 | 0 | -4.037867 | 3.008714  | -2.984188 |
| 41 | 6 | 0 | -7.962791 | 2.603234  | -1.858243 |
| 42 | 9 | 0 | -8.117176 | 0.673681  | -3.181636 |
| 43 | 1 | 0 | -3.545210 | -4.227455 | -7.623448 |
| 44 | 1 | 0 | -2.349406 | -3.854958 | -6.360977 |
| 45 | 6 | 0 | -4.673534 | -5.810824 | -5.492613 |
| 46 | 1 | 0 | -6.062109 | -3.194321 | -2.926936 |
| 47 | 6 | 0 | -6.036965 | -5.256555 | -3.567574 |
| 48 | 6 | 0 | -7.199804 | 3.656950  | -1.374382 |
| 49 | 9 | 0 | -5.142838 | 4.796509  | -1.264262 |
| 50 | 9 | 0 | -9.230283 | 2.472569  | -1.480524 |
| 51 | 1 | 0 | -4.317514 | -6.534480 | -6.219655 |
| 52 | 6 | 0 | -5.549756 | -6.194493 | -4.475243 |
| 53 | 1 | 0 | -6.736552 | -5.568363 | -2.798657 |
| 54 | 9 | 0 | -7.738136 | 4.522927  | -0.525978 |
| 55 | 1 | 0 | -5.868747 | -7.229386 | -4.403185 |

-----  
**Re-TS1**  
-----

| Center<br>Number | Atomic<br>Number | Atomic<br>Type | Coordinates (Angstroms) |           |           |
|------------------|------------------|----------------|-------------------------|-----------|-----------|
|                  |                  |                | X                       | Y         | Z         |
| 1                | 6                | 0              | -3.303988               | -2.682286 | -2.188871 |

|    |   |   |           |           |           |
|----|---|---|-----------|-----------|-----------|
| 2  | 6 | 0 | -3.126253 | -3.945298 | -1.567554 |
| 3  | 6 | 0 | -4.256207 | -4.653328 | -1.124160 |
| 4  | 6 | 0 | -5.510147 | -4.088894 | -1.294117 |
| 5  | 6 | 0 | -5.660257 | -2.828688 | -1.902375 |
| 6  | 6 | 0 | -4.572687 | -2.109710 | -2.371704 |
| 7  | 1 | 0 | -4.143434 | -5.628615 | -0.659892 |
| 8  | 1 | 0 | -6.391952 | -4.624208 | -0.956834 |
| 9  | 1 | 0 | -6.644455 | -2.384916 | -2.022466 |
| 10 | 6 | 0 | -1.715777 | -4.218043 | -1.569285 |
| 11 | 1 | 0 | -1.222977 | -5.095067 | -1.176518 |
| 12 | 6 | 0 | -1.106999 | -3.151833 | -2.169582 |
| 13 | 1 | 0 | -0.061580 | -2.969768 | -2.370463 |
| 14 | 7 | 0 | -2.054398 | -2.229050 | -2.552109 |
| 15 | 1 | 0 | -1.850031 | -1.350392 | -3.001282 |
| 16 | 6 | 0 | -4.781435 | -0.760165 | -3.041218 |
| 17 | 1 | 0 | -3.799349 | -0.293390 | -3.279608 |
| 18 | 8 | 0 | -5.740355 | -0.031106 | -2.657594 |
| 19 | 6 | 0 | -5.260746 | -1.310792 | -4.757278 |
| 20 | 7 | 0 | -6.281392 | -0.682094 | -5.379574 |
| 21 | 7 | 0 | -5.299524 | -2.538108 | -5.301367 |
| 22 | 6 | 0 | -6.917501 | -1.580491 | -6.214575 |
| 23 | 6 | 0 | -6.874093 | 0.641797  | -5.167243 |
| 24 | 7 | 0 | -6.321569 | -2.732170 | -6.197797 |
| 25 | 6 | 0 | -4.411190 | -3.599036 | -5.023175 |
| 26 | 6 | 0 | -8.149150 | -1.233820 | -7.016626 |
| 27 | 6 | 0 | -7.746891 | 0.933821  | -6.393791 |
| 28 | 1 | 0 | -7.490273 | 0.563667  | -4.264504 |
| 29 | 6 | 0 | -6.062505 | 1.912728  | -5.108957 |
| 30 | 6 | 0 | -4.894622 | -4.813232 | -4.546481 |
| 31 | 6 | 0 | -3.040716 | -3.425465 | -5.181498 |
| 32 | 1 | 0 | -8.876054 | -2.041225 | -6.920394 |
| 33 | 1 | 0 | -7.867758 | -1.133886 | -8.073985 |
| 34 | 8 | 0 | -8.750225 | -0.040697 | -6.549600 |
| 35 | 1 | 0 | -7.089148 | 0.921078  | -7.279291 |
| 36 | 6 | 0 | -8.182422 | 2.374214  | -6.158556 |
| 37 | 6 | 0 | -6.870796 | 2.934138  | -5.636686 |
| 38 | 6 | 0 | -4.797947 | 2.189473  | -4.614272 |
| 39 | 6 | 0 | -4.018896 | -5.842105 | -4.236756 |
| 40 | 9 | 0 | -6.195837 | -4.985479 | -4.358954 |
| 41 | 6 | 0 | -2.159902 | -4.447554 | -4.868532 |
| 42 | 9 | 0 | -2.559162 | -2.253030 | -5.586607 |
| 43 | 1 | 0 | -8.543752 | 2.871249  | -7.060158 |
| 44 | 1 | 0 | -8.969673 | 2.410258  | -5.395443 |
| 45 | 6 | 0 | -6.415516 | 4.245024  | -5.663878 |
| 46 | 1 | 0 | -4.174544 | 1.403576  | -4.207767 |
| 47 | 6 | 0 | -4.338636 | 3.507106  | -4.658088 |
| 48 | 6 | 0 | -2.652016 | -5.654982 | -4.393308 |
| 49 | 9 | 0 | -4.478880 | -6.987225 | -3.743330 |
| 50 | 9 | 0 | -0.849254 | -4.261829 | -4.989017 |
| 51 | 1 | 0 | -7.035408 | 5.035534  | -6.076188 |
| 52 | 6 | 0 | -5.140935 | 4.525820  | -5.169501 |
| 53 | 1 | 0 | -3.346637 | 3.739868  | -4.284734 |
| 54 | 9 | 0 | -1.810334 | -6.621846 | -4.053431 |
| 55 | 1 | 0 | -4.767849 | 5.544695  | -5.191675 |

-----  
**TS2**  
-----

| Center<br>Number | Atomic<br>Number | Atomic<br>Type | Coordinates (Angstroms) |           |           |
|------------------|------------------|----------------|-------------------------|-----------|-----------|
|                  |                  |                | X                       | Y         | Z         |
| 1                | 6                | 0              | -3.173192               | -2.281627 | -2.738352 |

|    |   |   |           |           |           |
|----|---|---|-----------|-----------|-----------|
| 2  | 6 | 0 | -2.340198 | -3.377200 | -2.413694 |
| 3  | 6 | 0 | -2.895909 | -4.468542 | -1.719505 |
| 4  | 6 | 0 | -4.237239 | -4.424097 | -1.376345 |
| 5  | 6 | 0 | -5.054258 | -3.335632 | -1.742429 |
| 6  | 6 | 0 | -4.551557 | -2.261620 | -2.463697 |
| 7  | 1 | 0 | -2.281819 | -5.324207 | -1.455766 |
| 8  | 1 | 0 | -4.678973 | -5.252706 | -0.831545 |
| 9  | 1 | 0 | -6.110672 | -3.322794 | -1.495689 |
| 10 | 6 | 0 | -1.034805 | -3.070126 | -2.932320 |
| 11 | 1 | 0 | -0.149117 | -3.685449 | -2.873320 |
| 12 | 6 | 0 | -1.119514 | -1.840348 | -3.525088 |
| 13 | 1 | 0 | -0.361016 | -1.254215 | -4.022695 |
| 14 | 7 | 0 | -2.406722 | -1.362740 | -3.417297 |
| 15 | 1 | 0 | -2.713055 | -0.447152 | -3.708929 |
| 16 | 6 | 0 | -5.431003 | -1.165140 | -2.937800 |
| 17 | 1 | 0 | -5.569183 | -0.223080 | -2.270202 |
| 18 | 8 | 0 | -6.693672 | -0.956331 | -2.235597 |
| 19 | 6 | 0 | -5.526220 | -0.899071 | -4.342765 |
| 20 | 7 | 0 | -6.257525 | 0.107122  | -4.905349 |
| 21 | 7 | 0 | -5.023504 | -1.566432 | -5.417426 |
| 22 | 6 | 0 | -6.249588 | -0.080958 | -6.271519 |
| 23 | 6 | 0 | -7.124214 | 1.111850  | -4.289743 |
| 24 | 7 | 0 | -5.489877 | -1.068286 | -6.616899 |
| 25 | 6 | 0 | -4.389887 | -2.828644 | -5.409300 |
| 26 | 6 | 0 | -7.123739 | 0.729148  | -7.199952 |
| 27 | 6 | 0 | -7.613324 | 2.044622  | -5.406180 |
| 28 | 1 | 0 | -7.965792 | 0.570146  | -3.846607 |
| 29 | 6 | 0 | -6.652393 | 2.163657  | -3.303627 |
| 30 | 6 | 0 | -5.051698 | -3.929430 | -4.875438 |
| 31 | 6 | 0 | -3.082950 | -2.966216 | -5.861926 |
| 32 | 1 | 0 | -7.555732 | 0.059153  | -7.943645 |
| 33 | 1 | 0 | -6.521122 | 1.491443  | -7.711320 |
| 34 | 8 | 0 | -8.181061 | 1.332613  | -6.475946 |
| 35 | 1 | 0 | -6.737480 | 2.602647  | -5.776437 |
| 36 | 6 | 0 | -8.480467 | 3.025182  | -4.624251 |
| 37 | 6 | 0 | -7.544610 | 3.244487  | -3.447265 |
| 38 | 6 | 0 | -5.602439 | 2.236463  | -2.399416 |
| 39 | 6 | 0 | -4.396044 | -5.141517 | -4.733567 |
| 40 | 9 | 0 | -6.302678 | -3.801139 | -4.449361 |
| 41 | 6 | 0 | -2.425277 | -4.179929 | -5.741138 |
| 42 | 9 | 0 | -2.437146 | -1.916378 | -6.356102 |
| 43 | 1 | 0 | -8.706693 | 3.941747  | -5.170871 |
| 44 | 1 | 0 | -9.420719 | 2.545972  | -4.325648 |
| 45 | 6 | 0 | -7.428853 | 4.365128  | -2.639523 |
| 46 | 1 | 0 | -4.854348 | 1.453457  | -2.336249 |
| 47 | 6 | 0 | -5.486894 | 3.371110  | -1.592143 |
| 48 | 6 | 0 | -3.083523 | -5.261974 | -5.170559 |
| 49 | 9 | 0 | -5.012818 | -6.182603 | -4.185654 |
| 50 | 9 | 0 | -1.162594 | -4.304432 | -6.136800 |
| 51 | 1 | 0 | -8.113223 | 5.199970  | -2.757034 |
| 52 | 6 | 0 | -6.400338 | 4.416483  | -1.696403 |
| 53 | 1 | 0 | -4.668974 | 3.437515  | -0.882491 |
| 54 | 9 | 0 | -2.446162 | -6.416654 | -5.025759 |
| 55 | 1 | 0 | -6.295837 | 5.289283  | -1.060162 |

-----  
**TS3**  
-----

| Center<br>Number | Atomic<br>Number | Atomic<br>Type | Coordinates (Angstroms) |           |           |
|------------------|------------------|----------------|-------------------------|-----------|-----------|
|                  |                  |                | X                       | Y         | Z         |
| 1                | 6                | 0              | -2.587990               | -2.232589 | -2.633065 |

|    |   |   |            |           |           |
|----|---|---|------------|-----------|-----------|
| 2  | 6 | 0 | -1.490022  | -3.109746 | -2.444798 |
| 3  | 6 | 0 | -1.665816  | -4.266396 | -1.667446 |
| 4  | 6 | 0 | -2.910168  | -4.502895 | -1.106574 |
| 5  | 6 | 0 | -3.983212  | -3.617620 | -1.316965 |
| 6  | 6 | 0 | -3.865645  | -2.481387 | -2.106152 |
| 7  | 1 | 0 | -0.841881  | -4.956332 | -1.512248 |
| 8  | 1 | 0 | -3.066561  | -5.387838 | -0.497360 |
| 9  | 1 | 0 | -4.952127  | -3.801711 | -0.864882 |
| 10 | 6 | 0 | -0.381157  | -2.556657 | -3.174329 |
| 11 | 1 | 0 | 0.615661   | -2.965593 | -3.249332 |
| 12 | 6 | 0 | -0.824291  | -1.405905 | -3.761942 |
| 13 | 1 | 0 | -0.307510  | -0.701418 | -4.397072 |
| 14 | 7 | 0 | -2.146182  | -1.200967 | -3.431258 |
| 15 | 1 | 0 | -2.725019  | -0.465001 | -3.802611 |
| 16 | 6 | 0 | -5.107367  | -1.604220 | -2.274996 |
| 17 | 1 | 0 | -4.632290  | -0.310603 | -2.317057 |
| 18 | 8 | 0 | -5.909084  | -1.573802 | -1.239072 |
| 19 | 6 | 0 | -5.644951  | -1.558020 | -3.618436 |
| 20 | 7 | 0 | -6.778542  | -0.882733 | -4.077572 |
| 21 | 7 | 0 | -4.940435  | -1.869207 | -4.773699 |
| 22 | 6 | 0 | -6.585382  | -0.742002 | -5.459829 |
| 23 | 6 | 0 | -8.249314  | -0.909327 | -3.725583 |
| 24 | 7 | 0 | -5.527262  | -1.316069 | -5.901952 |
| 25 | 6 | 0 | -4.113329  | -2.990399 | -4.979561 |
| 26 | 6 | 0 | -7.480158  | 0.084805  | -6.339180 |
| 27 | 6 | 0 | -8.876967  | 0.251080  | -4.530786 |
| 28 | 1 | 0 | -8.624602  | -1.854609 | -4.142022 |
| 29 | 6 | 0 | -8.910748  | -0.716120 | -2.361463 |
| 30 | 6 | 0 | -4.419087  | -4.229892 | -4.424258 |
| 31 | 6 | 0 | -2.924351  | -2.850544 | -5.689599 |
| 32 | 1 | 0 | -7.414087  | -0.286857 | -7.361922 |
| 33 | 1 | 0 | -7.119484  | 1.125212  | -6.314399 |
| 34 | 8 | 0 | -8.821687  | 0.025084  | -5.917674 |
| 35 | 1 | 0 | -8.309636  | 1.163385  | -4.275679 |
| 36 | 6 | 0 | -10.294198 | 0.377239  | -4.010149 |
| 37 | 6 | 0 | -10.102904 | 0.000260  | -2.564934 |
| 38 | 6 | 0 | -8.647862  | -1.265819 | -1.109657 |
| 39 | 6 | 0 | -3.514323  | -5.277863 | -4.490476 |
| 40 | 9 | 0 | -5.566001  | -4.402616 | -3.771576 |
| 41 | 6 | 0 | -2.027490  | -3.900897 | -5.789006 |
| 42 | 9 | 0 | -2.607938  | -1.670204 | -6.220393 |
| 43 | 1 | 0 | -10.716268 | 1.372621  | -4.161863 |
| 44 | 1 | 0 | -10.935117 | -0.350772 | -4.523376 |
| 45 | 6 | 0 | -10.986356 | 0.241310  | -1.520258 |
| 46 | 1 | 0 | -7.736978  | -1.830839 | -0.959106 |
| 47 | 6 | 0 | -9.537661  | -1.019127 | -0.063253 |
| 48 | 6 | 0 | -2.320593  | -5.113817 | -5.178868 |
| 49 | 9 | 0 | -3.796178  | -6.443233 | -3.914902 |
| 50 | 9 | 0 | -0.876651  | -3.743009 | -6.437583 |
| 51 | 1 | 0 | -11.895852 | 0.808390  | -1.696397 |
| 52 | 6 | 0 | -10.691553 | -0.262055 | -0.255881 |
| 53 | 1 | 0 | -9.323386  | -1.429654 | 0.918888  |
| 54 | 9 | 0 | -1.451081  | -6.116688 | -5.249051 |
| 55 | 1 | 0 | -11.367015 | -0.076145 | 0.573492  |
| 56 | 6 | 0 | -3.738779  | 1.828700  | -2.988596 |
| 57 | 1 | 0 | -2.649362  | 1.757485  | -3.059247 |
| 58 | 1 | 0 | -3.960069  | 2.886272  | -2.802463 |
| 59 | 6 | 0 | -4.339498  | 1.431653  | -4.337303 |
| 60 | 1 | 0 | -5.423707  | 1.335047  | -4.289672 |
| 61 | 1 | 0 | -4.098987  | 2.209962  | -5.066291 |
| 62 | 1 | 0 | -3.947470  | 0.494021  | -4.744291 |



|    |   |   |           |           |           |
|----|---|---|-----------|-----------|-----------|
| 63 | 6 | 0 | -2.982078 | 0.780987  | -0.913800 |
| 64 | 1 | 0 | -2.226298 | 0.422312  | -1.615472 |
| 65 | 6 | 0 | -3.172522 | -0.330453 | 0.134179  |
| 66 | 1 | 0 | -4.071242 | -0.922042 | -0.052409 |
| 67 | 1 | 0 | -2.310123 | -1.002640 | 0.101475  |
| 68 | 1 | 0 | -3.231877 | 0.082338  | 1.144737  |
| 69 | 6 | 0 | -2.442815 | 2.063208  | -0.276019 |
| 70 | 1 | 0 | -1.493998 | 1.834870  | 0.216963  |
| 71 | 1 | 0 | -2.257263 | 2.852033  | -1.010889 |
| 72 | 1 | 0 | -3.123969 | 2.451746  | 0.486241  |
| 73 | 6 | 0 | -5.296252 | 1.774530  | -1.106138 |
| 74 | 1 | 0 | -4.914942 | 2.791076  | -0.926689 |
| 75 | 6 | 0 | -6.520113 | 1.869696  | -2.012577 |
| 76 | 1 | 0 | -7.341370 | 2.332763  | -1.459680 |
| 77 | 1 | 0 | -6.347723 | 2.471248  | -2.907555 |
| 78 | 1 | 0 | -6.829566 | 0.858364  | -2.291320 |
| 79 | 6 | 0 | -5.728619 | 1.177699  | 0.230219  |
| 80 | 1 | 0 | -6.015787 | 0.132948  | 0.086870  |
| 81 | 1 | 0 | -4.958031 | 1.254527  | 0.997190  |
| 82 | 1 | 0 | -6.594260 | 1.747327  | 0.579900  |
| 83 | 7 | 0 | -4.182844 | 1.029851  | -1.800205 |

-----

**TS4**

-----

| Center<br>Number | Atomic<br>Number | Atomic<br>Type | Coordinates (Angstroms) |           |           |
|------------------|------------------|----------------|-------------------------|-----------|-----------|
|                  |                  |                | X                       | Y         | Z         |
| 1                | 6                | 0              | -2.608585               | -2.279414 | -2.599417 |
| 2                | 6                | 0              | -1.521828               | -3.153261 | -2.343710 |
| 3                | 6                | 0              | -1.750700               | -4.347428 | -1.641805 |
| 4                | 6                | 0              | -3.038567               | -4.635715 | -1.225717 |
| 5                | 6                | 0              | -4.105199               | -3.761338 | -1.502976 |
| 6                | 6                | 0              | -3.926846               | -2.574688 | -2.206455 |
| 7                | 1                | 0              | -0.931390               | -5.028709 | -1.435517 |
| 8                | 1                | 0              | -3.239152               | -5.553412 | -0.683211 |
| 9                | 1                | 0              | -5.107664               | -4.018534 | -1.178306 |
| 10               | 6                | 0              | -0.354037               | -2.558945 | -2.932809 |
| 11               | 1                | 0              | 0.649733                | -2.956423 | -2.922953 |
| 12               | 6                | 0              | -0.751789               | -1.389848 | -3.513196 |
| 13               | 1                | 0              | -0.186238               | -0.652559 | -4.063723 |
| 14               | 7                | 0              | -2.105203               | -1.210956 | -3.306787 |
| 15               | 1                | 0              | -2.642988               | -0.470462 | -3.727077 |
| 16               | 6                | 0              | -5.104980               | -1.660691 | -2.459893 |
| 17               | 1                | 0              | -4.667388               | -0.281586 | -2.217805 |
| 18               | 8                | 0              | -6.124458               | -1.844353 | -1.506526 |
| 19               | 6                | 0              | -5.722915               | -1.702558 | -3.771842 |
| 20               | 7                | 0              | -6.908130               | -1.153845 | -4.195448 |
| 21               | 7                | 0              | -5.076741               | -2.048135 | -4.919469 |
| 22               | 6                | 0              | -6.831252               | -1.109904 | -5.590350 |
| 23               | 6                | 0              | -8.335026               | -0.936104 | -3.709519 |
| 24               | 7                | 0              | -5.754205               | -1.649093 | -6.045050 |
| 25               | 6                | 0              | -4.041274               | -2.998370 | -5.083550 |
| 26               | 6                | 0              | -7.805122               | -0.374867 | -6.484310 |
| 27               | 6                | 0              | -8.794718               | 0.303091  | -4.515122 |
| 28               | 1                | 0              | -8.863448               | -1.814499 | -4.097942 |
| 29               | 6                | 0              | -8.857151               | -0.657474 | -2.306824 |
| 30               | 6                | 0              | -4.208635               | -4.297029 | -4.613839 |
| 31               | 6                | 0              | -2.851411               | -2.641481 | -5.704292 |
| 32               | 1                | 0              | -8.014815               | -0.983799 | -7.364457 |
| 33               | 1                | 0              | -7.294519               | 0.544397  | -6.807301 |
| 34               | 8                | 0              | -9.023591               | -0.061866 | -5.854122 |

|    |   |   |            |           |           |
|----|---|---|------------|-----------|-----------|
| 35 | 1 | 0 | -7.991876  | 1.056641  | -4.464311 |
| 36 | 6 | 0 | -10.025684 | 0.837800  | -3.810610 |
| 37 | 6 | 0 | -9.803396  | 0.376891  | -2.392786 |
| 38 | 6 | 0 | -8.761983  | -1.391881 | -1.124687 |
| 39 | 6 | 0 | -3.165146  | -5.205766 | -4.679552 |
| 40 | 9 | 0 | -5.353503  | -4.643983 | -4.038093 |
| 41 | 6 | 0 | -1.808803  | -3.548930 | -5.796051 |
| 42 | 9 | 0 | -2.681712  | -1.394111 | -6.137070 |
| 43 | 1 | 0 | -10.136585 | 1.918241  | -3.920398 |
| 44 | 1 | 0 | -10.920820 | 0.357901  | -4.223745 |
| 45 | 6 | 0 | -10.516039 | 0.791914  | -1.273165 |
| 46 | 1 | 0 | -8.141099  | -2.272971 | -1.069842 |
| 47 | 6 | 0 | -9.479203  | -0.977794 | -0.004586 |
| 48 | 6 | 0 | -1.969436  | -4.828770 | -5.278440 |
| 49 | 9 | 0 | -3.304129  | -6.427961 | -4.181597 |
| 50 | 9 | 0 | -0.655354  | -3.194128 | -6.347724 |
| 51 | 1 | 0 | -11.228195 | 1.607455  | -1.353921 |
| 52 | 6 | 0 | -10.326232 | 0.128749  | -0.064852 |
| 53 | 1 | 0 | -9.385359  | -1.535245 | 0.921588  |
| 54 | 9 | 0 | -0.964018  | -5.688757 | -5.336152 |
| 55 | 1 | 0 | -10.870301 | 0.444259  | 0.819462  |
| 56 | 6 | 0 | -3.831875  | 1.698437  | -3.015712 |
| 57 | 1 | 0 | -2.741742  | 1.642943  | -3.064751 |
| 58 | 1 | 0 | -4.070299  | 2.755891  | -2.868656 |
| 59 | 6 | 0 | -4.413485  | 1.233096  | -4.352275 |
| 60 | 1 | 0 | -5.498706  | 1.132415  | -4.326940 |
| 61 | 1 | 0 | -4.166271  | 1.983207  | -5.106947 |
| 62 | 1 | 0 | -4.003261  | 0.285675  | -4.714555 |
| 63 | 6 | 0 | -3.078259  | 0.758457  | -0.877017 |
| 64 | 1 | 0 | -2.297684  | 0.424898  | -1.561869 |
| 65 | 6 | 0 | -3.210406  | -0.343678 | 0.182280  |
| 66 | 1 | 0 | -3.911021  | -1.130580 | -0.099231 |
| 67 | 1 | 0 | -2.236207  | -0.827221 | 0.293163  |
| 68 | 1 | 0 | -3.495375  | 0.045051  | 1.160686  |
| 69 | 6 | 0 | -2.617008  | 2.068758  | -0.243058 |
| 70 | 1 | 0 | -1.659946  | 1.891109  | 0.253503  |
| 71 | 1 | 0 | -2.468142  | 2.861210  | -0.981474 |
| 72 | 1 | 0 | -3.320003  | 2.422853  | 0.516124  |
| 73 | 6 | 0 | -5.421600  | 1.703157  | -1.152921 |
| 74 | 1 | 0 | -5.019766  | 2.694696  | -0.912158 |
| 75 | 6 | 0 | -6.571473  | 1.867145  | -2.140393 |
| 76 | 1 | 0 | -7.440132  | 2.274159  | -1.617705 |
| 77 | 1 | 0 | -6.337870  | 2.534557  | -2.971833 |
| 78 | 1 | 0 | -6.855263  | 0.883669  | -2.525130 |
| 79 | 6 | 0 | -5.967357  | 1.079836  | 0.125736  |
| 80 | 1 | 0 | -6.451020  | 0.121698  | -0.080742 |
| 81 | 1 | 0 | -5.226301  | 0.962289  | 0.912537  |
| 82 | 1 | 0 | -6.744870  | 1.745536  | 0.508226  |
| 83 | 7 | 0 | -4.281413  | 0.941074  | -1.791032 |
| 84 | 1 | 0 | -5.784610  | -1.602808 | -0.635104 |

-----  
**TS5**  
-----

| Center<br>Number | Atomic<br>Number | Atomic<br>Type | Coordinates (Angstroms) |           |           |
|------------------|------------------|----------------|-------------------------|-----------|-----------|
|                  |                  |                | X                       | Y         | Z         |
| 1                | 6                | 0              | -2.656340               | -1.869879 | -2.729061 |
| 2                | 6                | 0              | -1.435365               | -2.583605 | -2.613364 |
| 3                | 6                | 0              | -1.396145               | -3.774647 | -1.872260 |
| 4                | 6                | 0              | -2.562950               | -4.214487 | -1.273280 |
| 5                | 6                | 0              | -3.762791               | -3.497700 | -1.416186 |

|    |   |   |            |           |           |
|----|---|---|------------|-----------|-----------|
| 6  | 6 | 0 | -3.860140  | -2.326002 | -2.159248 |
| 7  | 1 | 0 | -0.469387  | -4.330892 | -1.774536 |
| 8  | 1 | 0 | -2.565031  | -5.127565 | -0.686418 |
| 9  | 1 | 0 | -4.650981  | -3.875308 | -0.926110 |
| 10 | 6 | 0 | -0.448222  | -1.858271 | -3.363736 |
| 11 | 1 | 0 | 0.592423   | -2.118683 | -3.485392 |
| 12 | 6 | 0 | -1.074163  | -0.769214 | -3.895402 |
| 13 | 1 | 0 | -0.692539  | 0.020063  | -4.526095 |
| 14 | 7 | 0 | -2.398290  | -0.763282 | -3.506123 |
| 15 | 1 | 0 | -3.080663  | -0.113972 | -3.861386 |
| 16 | 6 | 0 | -5.184108  | -1.600201 | -2.252716 |
| 17 | 1 | 0 | -4.859937  | -0.252652 | -1.896544 |
| 18 | 8 | 0 | -6.058959  | -1.950979 | -1.223945 |
| 19 | 6 | 0 | -5.825313  | -1.511901 | -3.566086 |
| 20 | 7 | 0 | -6.987731  | -0.863764 | -3.958597 |
| 21 | 7 | 0 | -5.172770  | -1.777282 | -4.733491 |
| 22 | 6 | 0 | -6.880635  | -0.728631 | -5.348570 |
| 23 | 6 | 0 | -8.437744  | -0.777877 | -3.470873 |
| 24 | 7 | 0 | -5.815837  | -1.264440 | -5.829666 |
| 25 | 6 | 0 | -4.184864  | -2.759569 | -4.985576 |
| 26 | 6 | 0 | -7.848697  | 0.017133  | -6.222320 |
| 27 | 6 | 0 | -9.115724  | 0.304888  | -4.349031 |
| 28 | 1 | 0 | -8.855428  | -1.751656 | -3.758056 |
| 29 | 6 | 0 | -9.001972  | -0.416338 | -2.088040 |
| 30 | 6 | 0 | -4.309171  | -4.035788 | -4.450858 |
| 31 | 6 | 0 | -3.068880  | -2.450208 | -5.756056 |
| 32 | 1 | 0 | -7.835723  | -0.430020 | -7.216254 |
| 33 | 1 | 0 | -7.510943  | 1.061783  | -6.294686 |
| 34 | 8 | 0 | -9.150373  | -0.048978 | -5.704173 |
| 35 | 1 | 0 | -8.549513  | 1.243141  | -4.212881 |
| 36 | 6 | 0 | -10.502142 | 0.461471  | -3.762400 |
| 37 | 6 | 0 | -10.215458 | 0.261519  | -2.302201 |
| 38 | 6 | 0 | -8.642063  | -0.741191 | -0.783731 |
| 39 | 6 | 0 | -3.290023  | -4.962974 | -4.586528 |
| 40 | 9 | 0 | -5.389234  | -4.346975 | -3.734281 |
| 41 | 6 | 0 | -2.054173  | -3.379116 | -5.921459 |
| 42 | 9 | 0 | -2.935053  | -1.232894 | -6.271349 |
| 43 | 1 | 0 | -10.953114 | 1.426296  | -3.999975 |
| 44 | 1 | 0 | -11.151297 | -0.331563 | -4.153866 |
| 45 | 6 | 0 | -11.028078 | 0.649007  | -1.244545 |
| 46 | 1 | 0 | -7.722697  | -1.264317 | -0.585658 |
| 47 | 6 | 0 | -9.456561  | -0.348475 | 0.278699  |
| 48 | 6 | 0 | -2.163782  | -4.632304 | -5.329173 |
| 49 | 9 | 0 | -3.392058  | -6.156039 | -4.014977 |
| 50 | 9 | 0 | -0.969172  | -3.067654 | -6.618736 |
| 51 | 1 | 0 | -11.953725 | 1.180830  | -1.442197 |
| 52 | 6 | 0 | -10.641469 | 0.348076  | 0.058143  |
| 53 | 1 | 0 | -9.149435  | -0.592502 | 1.291435  |
| 54 | 9 | 0 | -1.180690  | -5.509985 | -5.461421 |
| 55 | 1 | 0 | -11.262146 | 0.650001  | 0.895267  |
| 56 | 6 | 0 | -4.064776  | 1.884859  | -2.486391 |
| 57 | 1 | 0 | -2.991743  | 1.768269  | -2.656665 |
| 58 | 1 | 0 | -4.209060  | 2.920773  | -2.159943 |
| 59 | 6 | 0 | -4.788946  | 1.684869  | -3.819288 |
| 60 | 1 | 0 | -5.864861  | 1.834142  | -3.751720 |
| 61 | 1 | 0 | -4.392878  | 2.417444  | -4.526565 |
| 62 | 1 | 0 | -4.631710  | 0.699526  | -4.268706 |
| 63 | 6 | 0 | -3.186868  | 0.657036  | -0.557297 |
| 64 | 1 | 0 | -2.470461  | 0.376662  | -1.331934 |
| 65 | 6 | 0 | -3.306027  | -0.546522 | 0.393828  |
| 66 | 1 | 0 | -4.158450  | -1.185435 | 0.162524  |

|     |   |   |            |           |           |
|-----|---|---|------------|-----------|-----------|
| 67  | 1 | 0 | -2.404090  | -1.157871 | 0.299339  |
| 68  | 1 | 0 | -3.384764  | -0.230004 | 1.436017  |
| 69  | 6 | 0 | -2.628349  | 1.876576  | 0.173262  |
| 70  | 1 | 0 | -1.653218  | 1.608854  | 0.588052  |
| 71  | 1 | 0 | -2.485678  | 2.736224  | -0.486876 |
| 72  | 1 | 0 | -3.267182  | 2.175760  | 1.008859  |
| 73  | 6 | 0 | -5.526874  | 1.626807  | -0.531849 |
| 74  | 1 | 0 | -5.105920  | 2.576580  | -0.175649 |
| 75  | 6 | 0 | -6.735721  | 1.958202  | -1.405637 |
| 76  | 1 | 0 | -7.593305  | 2.192764  | -0.771037 |
| 77  | 1 | 0 | -6.555856  | 2.817984  | -2.053513 |
| 78  | 1 | 0 | -7.010866  | 1.099186  | -2.021749 |
| 79  | 6 | 0 | -5.941028  | 0.805157  | 0.685226  |
| 80  | 1 | 0 | -6.164965  | -0.228435 | 0.413355  |
| 81  | 1 | 0 | -5.176245  | 0.806630  | 1.461374  |
| 82  | 1 | 0 | -6.843137  | 1.251625  | 1.110053  |
| 83  | 7 | 0 | -4.443691  | 0.970468  | -1.354090 |
| 84  | 6 | 0 | -8.059034  | -4.213441 | -2.099409 |
| 85  | 1 | 0 | -7.522242  | -4.664507 | -2.939060 |
| 86  | 6 | 0 | -7.981122  | -4.092460 | 0.361788  |
| 87  | 1 | 0 | -8.636608  | -3.275312 | 0.036741  |
| 88  | 6 | 0 | -7.057732  | -3.486728 | 1.428391  |
| 89  | 1 | 0 | -6.320754  | -2.812761 | 0.982569  |
| 90  | 1 | 0 | -7.663676  | -2.911087 | 2.135424  |
| 91  | 1 | 0 | -6.528383  | -4.249730 | 2.002867  |
| 92  | 6 | 0 | -8.884854  | -5.154038 | 1.003412  |
| 93  | 1 | 0 | -9.451768  | -4.687402 | 1.814889  |
| 94  | 1 | 0 | -9.597188  | -5.581041 | 0.296585  |
| 95  | 1 | 0 | -8.303680  | -5.970002 | 1.440824  |
| 96  | 6 | 0 | -6.523573  | -5.764825 | -0.953956 |
| 97  | 6 | 0 | -5.653885  | -6.037752 | 0.273579  |
| 98  | 1 | 0 | -6.246989  | -6.346367 | 1.137888  |
| 99  | 1 | 0 | -5.053396  | -5.173776 | 0.566138  |
| 100 | 1 | 0 | -4.972346  | -6.859252 | 0.036624  |
| 101 | 7 | 0 | -7.264427  | -4.478311 | -0.882261 |
| 102 | 1 | 0 | -6.289284  | -2.934207 | -1.204593 |
| 103 | 1 | 0 | -8.034374  | -3.126697 | -2.262839 |
| 104 | 6 | 0 | -9.530591  | -4.635135 | -2.148341 |
| 105 | 1 | 0 | -9.930465  | -4.383824 | -3.135699 |
| 106 | 1 | 0 | -9.672596  | -5.706260 | -1.992085 |
| 107 | 1 | 0 | -10.128090 | -4.095541 | -1.408381 |
| 108 | 6 | 0 | -7.366504  | -7.006778 | -1.276652 |
| 109 | 1 | 0 | -6.706520  | -7.877074 | -1.341160 |
| 110 | 1 | 0 | -8.114646  | -7.209004 | -0.506550 |
| 111 | 1 | 0 | -7.873285  | -6.911290 | -2.239632 |
| 112 | 1 | 0 | -5.835936  | -5.631154 | -1.800395 |

-----  
**TS6**  
-----

| Center<br>Number | Atomic<br>Number | Atomic<br>Type | Coordinates (Angstroms) |           |           |
|------------------|------------------|----------------|-------------------------|-----------|-----------|
|                  |                  |                | X                       | Y         | Z         |
| 1                | 6                | 0              | -16.089317              | -2.657024 | 26.896619 |
| 2                | 6                | 0              | -16.195318              | -3.934886 | 27.491259 |
| 3                | 6                | 0              | -16.893398              | -4.079475 | 28.700733 |
| 4                | 6                | 0              | -17.465189              | -2.949641 | 29.275174 |
| 5                | 6                | 0              | -17.362373              | -1.693365 | 28.669106 |
| 6                | 6                | 0              | -16.615478              | -1.488964 | 27.497999 |
| 7                | 1                | 0              | -16.995340              | -5.055670 | 29.166520 |
| 8                | 1                | 0              | -18.016467              | -3.041038 | 30.206307 |
| 9                | 1                | 0              | -17.798127              | -0.821340 | 29.146198 |

|    |   |   |            |           |           |
|----|---|---|------------|-----------|-----------|
| 10 | 6 | 0 | -15.535340 | -4.860553 | 26.613822 |
| 11 | 1 | 0 | -15.423606 | -5.924684 | 26.761566 |
| 12 | 6 | 0 | -15.069864 | -4.139082 | 25.550665 |
| 13 | 1 | 0 | -14.516723 | -4.454120 | 24.678049 |
| 14 | 7 | 0 | -15.398201 | -2.810152 | 25.720424 |
| 15 | 1 | 0 | -15.176294 | -2.079849 | 25.061723 |
| 16 | 6 | 0 | -16.369008 | -0.130574 | 27.025168 |
| 17 | 8 | 0 | -17.275299 | 0.799286  | 27.078952 |
| 18 | 6 | 0 | -15.034448 | 0.277670  | 26.702543 |
| 19 | 7 | 0 | -14.575275 | 1.433554  | 26.103840 |
| 20 | 7 | 0 | -13.873944 | -0.409239 | 27.006066 |
| 21 | 6 | 0 | -13.195859 | 1.346582  | 26.080439 |
| 22 | 6 | 0 | -15.020241 | 2.805327  | 25.693682 |
| 23 | 7 | 0 | -12.747294 | 0.257908  | 26.608789 |
| 24 | 6 | 0 | -13.691723 | -1.476943 | 27.911592 |
| 25 | 6 | 0 | -12.361310 | 2.471403  | 25.549469 |
| 26 | 6 | 0 | -14.111377 | 3.739271  | 26.531186 |
| 27 | 1 | 0 | -14.732509 | 2.871587  | 24.636027 |
| 28 | 6 | 0 | -16.384036 | 3.436631  | 25.845181 |
| 29 | 6 | 0 | -13.008786 | -2.618884 | 27.504754 |
| 30 | 6 | 0 | -14.205156 | -1.416003 | 29.204550 |
| 31 | 1 | 0 | -12.428164 | 2.484284  | 24.454394 |
| 32 | 1 | 0 | -11.322955 | 2.293392  | 25.832772 |
| 33 | 8 | 0 | -12.775893 | 3.728788  | 26.071319 |
| 34 | 1 | 0 | -14.154839 | 3.364222  | 27.565069 |
| 35 | 6 | 0 | -14.763880 | 5.112230  | 26.473257 |
| 36 | 6 | 0 | -16.219692 | 4.753281  | 26.293491 |
| 37 | 6 | 0 | -17.622876 | 3.002480  | 25.391938 |
| 38 | 6 | 0 | -12.893947 | -3.709664 | 28.351510 |
| 39 | 9 | 0 | -12.509421 | -2.689898 | 26.275723 |
| 40 | 6 | 0 | -14.118958 | -2.512777 | 30.046522 |
| 41 | 9 | 0 | -14.825832 | -0.317584 | 29.621737 |
| 42 | 1 | 0 | -14.556994 | 5.715543  | 27.359333 |
| 43 | 1 | 0 | -14.396296 | 5.654769  | 25.594266 |
| 44 | 6 | 0 | -17.319331 | 5.597687  | 26.414326 |
| 45 | 1 | 0 | -17.739907 | 2.021889  | 24.956671 |
| 46 | 6 | 0 | -18.723411 | 3.844403  | 25.516874 |
| 47 | 6 | 0 | -13.458781 | -3.657394 | 29.619000 |
| 48 | 9 | 0 | -12.273983 | -4.812011 | 27.944748 |
| 49 | 9 | 0 | -14.655556 | -2.469304 | 31.260564 |
| 50 | 1 | 0 | -17.191024 | 6.612615  | 26.778072 |
| 51 | 6 | 0 | -18.577349 | 5.128731  | 26.046112 |
| 52 | 1 | 0 | -19.698250 | 3.494908  | 25.191725 |
| 53 | 9 | 0 | -13.374050 | -4.708655 | 30.423547 |
| 54 | 1 | 0 | -19.444151 | 5.774639  | 26.143361 |
| 55 | 6 | 0 | -20.232524 | -1.157688 | 26.885015 |
| 56 | 6 | 0 | -20.255830 | -2.457745 | 27.324781 |
| 57 | 6 | 0 | -19.510458 | -3.503222 | 26.698673 |
| 58 | 6 | 0 | -18.868410 | -3.177597 | 25.468301 |
| 59 | 6 | 0 | -18.831351 | -1.897255 | 24.964217 |
| 60 | 6 | 0 | -19.384603 | -0.850975 | 25.770768 |
| 61 | 1 | 0 | -20.873553 | -2.705544 | 28.175897 |
| 62 | 1 | 0 | -18.357179 | -3.961104 | 24.925328 |
| 63 | 6 | 0 | -19.429792 | -4.803996 | 27.277404 |
| 64 | 6 | 0 | -18.810082 | -5.901010 | 26.594930 |
| 65 | 6 | 0 | -19.961666 | -5.080741 | 28.581064 |
| 66 | 6 | 0 | -18.739729 | -7.164157 | 27.102185 |
| 67 | 1 | 0 | -18.381430 | -5.716690 | 25.619176 |
| 68 | 6 | 0 | -19.927086 | -6.309156 | 29.169306 |
| 69 | 1 | 0 | -20.382915 | -4.255838 | 29.139107 |
| 70 | 6 | 0 | -19.323016 | -7.439930 | 28.434221 |

|     |   |   |            |            |           |
|-----|---|---|------------|------------|-----------|
| 71  | 6 | 0 | -21.089005 | -0.059928  | 27.534296 |
| 72  | 6 | 0 | -21.978521 | 0.575864   | 26.449565 |
| 73  | 1 | 0 | -22.596036 | 1.365262   | 26.891835 |
| 74  | 1 | 0 | -21.370911 | 1.015001   | 25.655465 |
| 75  | 1 | 0 | -22.645903 | -0.172502  | 26.009746 |
| 76  | 6 | 0 | -22.008376 | -0.642647  | 28.615556 |
| 77  | 1 | 0 | -21.436511 | -1.054796  | 29.454088 |
| 78  | 1 | 0 | -22.647010 | 0.153672   | 29.008431 |
| 79  | 1 | 0 | -22.658433 | -1.428594  | 28.218069 |
| 80  | 6 | 0 | -20.239599 | 1.040459   | 28.198260 |
| 81  | 1 | 0 | -19.685394 | 1.629033   | 27.467140 |
| 82  | 1 | 0 | -20.902878 | 1.714984   | 28.751529 |
| 83  | 1 | 0 | -19.524966 | 0.612064   | 28.907030 |
| 84  | 6 | 0 | -18.268055 | -1.582971  | 23.571845 |
| 85  | 6 | 0 | -19.430823 | -1.045463  | 22.713785 |
| 86  | 1 | 0 | -20.221326 | -1.796098  | 22.617327 |
| 87  | 1 | 0 | -19.855517 | -0.143517  | 23.163298 |
| 88  | 1 | 0 | -19.070518 | -0.794475  | 21.709971 |
| 89  | 6 | 0 | -17.724026 | -2.846392  | 22.892971 |
| 90  | 1 | 0 | -17.382834 | -2.593926  | 21.884939 |
| 91  | 1 | 0 | -16.876644 | -3.269096  | 23.443859 |
| 92  | 1 | 0 | -18.493142 | -3.619183  | 22.800498 |
| 93  | 6 | 0 | -17.148920 | -0.520869  | 23.576713 |
| 94  | 1 | 0 | -16.466707 | -0.652697  | 24.422135 |
| 95  | 1 | 0 | -16.570175 | -0.588605  | 22.649549 |
| 96  | 1 | 0 | -17.563254 | 0.483661   | 23.647534 |
| 97  | 6 | 0 | -20.474736 | -6.551134  | 30.576958 |
| 98  | 6 | 0 | -21.035129 | -5.267312  | 31.200144 |
| 99  | 1 | 0 | -21.413501 | -5.491480  | 32.202023 |
| 100 | 1 | 0 | -20.266010 | -4.493633  | 31.299442 |
| 101 | 1 | 0 | -21.864807 | -4.858214  | 30.613957 |
| 102 | 6 | 0 | -19.346138 | -7.060778  | 31.493266 |
| 103 | 1 | 0 | -18.542240 | -6.318532  | 31.555822 |
| 104 | 1 | 0 | -19.735812 | -7.223313  | 32.504318 |
| 105 | 1 | 0 | -18.932906 | -7.997623  | 31.119266 |
| 106 | 6 | 0 | -21.616029 | -7.583978  | 30.528432 |
| 107 | 1 | 0 | -22.433599 | -7.218352  | 29.898169 |
| 108 | 1 | 0 | -21.263755 | -8.535537  | 30.131259 |
| 109 | 1 | 0 | -22.012330 | -7.744831  | 31.537272 |
| 110 | 6 | 0 | -18.084442 | -8.312427  | 26.331944 |
| 111 | 6 | 0 | -17.530287 | -7.849111  | 24.979093 |
| 112 | 1 | 0 | -16.779846 | -7.059428  | 25.093565 |
| 113 | 1 | 0 | -17.053972 | -8.697237  | 24.478278 |
| 114 | 1 | 0 | -18.323483 | -7.476394  | 24.322228 |
| 115 | 6 | 0 | -19.120288 | -9.419082  | 26.056788 |
| 116 | 1 | 0 | -19.511774 | -9.827252  | 26.988134 |
| 117 | 1 | 0 | -19.952784 | -9.022824  | 25.465839 |
| 118 | 1 | 0 | -18.652363 | -10.227549 | 25.483944 |
| 119 | 6 | 0 | -16.913371 | -8.891705  | 27.147835 |
| 120 | 1 | 0 | -16.154152 | -8.123330  | 27.330652 |
| 121 | 1 | 0 | -17.259274 | -9.276240  | 28.107241 |
| 122 | 1 | 0 | -16.439869 | -9.706321  | 26.588736 |
| 123 | 8 | 0 | -19.064462 | 0.401279   | 25.529328 |
| 124 | 8 | 0 | -19.296666 | -8.582976  | 28.921314 |
| 125 | 1 | 0 | -18.222975 | 0.640970   | 26.300136 |

---

**TS7**

| Center<br>Number | Atomic<br>Number | Atomic<br>Type | Coordinates (Angstroms) |           |           |
|------------------|------------------|----------------|-------------------------|-----------|-----------|
|                  |                  |                | X                       | Y         | Z         |
| 1                | 6                | 0              | -16.914070              | -2.527495 | 27.257299 |
| 2                | 6                | 0              | -15.720622              | -3.158309 | 26.782199 |
| 3                | 6                | 0              | -14.733019              | -2.404647 | 26.144914 |
| 4                | 6                | 0              | -14.916790              | -1.033650 | 25.968962 |
| 5                | 6                | 0              | -16.109092              | -0.426713 | 26.357038 |
| 6                | 6                | 0              | -17.145237              | -1.159908 | 26.962474 |
| 7                | 1                | 0              | -13.832039              | -2.886242 | 25.775298 |
| 8                | 1                | 0              | -14.153440              | -0.443537 | 25.474971 |
| 9                | 1                | 0              | -16.295487              | 0.614987  | 26.118402 |
| 10               | 6                | 0              | -15.860269              | -4.550690 | 27.091911 |
| 11               | 1                | 0              | -15.156668              | -5.341233 | 26.875166 |
| 12               | 6                | 0              | -17.064359              | -4.667984 | 27.728807 |
| 13               | 1                | 0              | -17.518432              | -5.561802 | 28.141850 |
| 14               | 7                | 0              | -17.722220              | -3.452961 | 27.855435 |
| 15               | 1                | 0              | -18.293687              | -3.384644 | 28.997543 |
| 16               | 6                | 0              | -18.449001              | -0.499656 | 26.938247 |
| 17               | 8                | 0              | -18.640857              | 0.698792  | 26.874882 |
| 18               | 6                | 0              | -19.709321              | -1.328212 | 26.698307 |
| 19               | 7                | 0              | -20.968323              | -1.093935 | 27.121961 |
| 20               | 7                | 0              | -19.814880              | -2.257902 | 25.743200 |
| 21               | 6                | 0              | -21.779626              | -1.958932 | 26.405464 |
| 22               | 6                | 0              | -21.618599              | -0.328853 | 28.238449 |
| 23               | 7                | 0              | -21.092495              | -2.662549 | 25.556654 |
| 24               | 6                | 0              | -18.783376              | -2.810028 | 24.938900 |
| 25               | 6                | 0              | -23.279647              | -2.036461 | 26.541651 |
| 26               | 6                | 0              | -23.071568              | -0.102215 | 27.777919 |
| 27               | 1                | 0              | -21.658317              | -1.045847 | 29.068957 |
| 28               | 6                | 0              | -21.230690              | 1.032160  | 28.798861 |
| 29               | 6                | 0              | -18.540406              | -4.177315 | 24.992881 |
| 30               | 6                | 0              | -17.985990              | -1.987157 | 24.150386 |
| 31               | 1                | 0              | -23.572466              | -3.083047 | 26.641162 |
| 32               | 1                | 0              | -23.716636              | -1.630391 | 25.619371 |
| 33               | 8                | 0              | -23.738092              | -1.335510 | 27.671974 |
| 34               | 1                | 0              | -23.048218              | 0.410300  | 26.803308 |
| 35               | 6                | 0              | -23.644320              | 0.827517  | 28.829845 |
| 36               | 6                | 0              | -22.432841              | 1.660036  | 29.171872 |
| 37               | 6                | 0              | -20.015582              | 1.605766  | 29.163955 |
| 38               | 6                | 0              | -17.471359              | -4.716378 | 24.294585 |
| 39               | 9                | 0              | -19.292621              | -4.959562 | 25.753514 |
| 40               | 6                | 0              | -16.904364              | -2.518329 | 23.467894 |
| 41               | 9                | 0              | -18.226046              | -0.681074 | 24.101278 |
| 42               | 1                | 0              | -24.493799              | 1.407357  | 28.466589 |
| 43               | 1                | 0              | -23.969374              | 0.239482  | 29.696833 |
| 44               | 6                | 0              | -22.425884              | 2.881124  | 29.832854 |
| 45               | 1                | 0              | -19.069358              | 1.140779  | 28.934903 |
| 46               | 6                | 0              | -20.013987              | 2.832229  | 29.827524 |
| 47               | 6                | 0              | -16.654106              | -3.884054 | 23.539870 |
| 48               | 9                | 0              | -17.206006              | -6.011878 | 24.378054 |
| 49               | 9                | 0              | -16.110685              | -1.732444 | 22.754653 |
| 50               | 1                | 0              | -23.363038              | 3.359404  | 30.100112 |
| 51               | 6                | 0              | -21.207071              | 3.473958  | 30.150882 |
| 52               | 1                | 0              | -19.065290              | 3.286116  | 30.093117 |
| 53               | 9                | 0              | -15.611476              | -4.391436 | 22.903182 |
| 54               | 1                | 0              | -21.186104              | 4.430434  | 30.662501 |
| 55               | 6                | 0              | -19.978326              | -4.427937 | 29.924001 |
| 56               | 1                | 0              | -20.564420              | -4.566167 | 30.837436 |

|    |   |   |            |           |           |
|----|---|---|------------|-----------|-----------|
| 57 | 1 | 0 | -19.516403 | -5.387725 | 29.688238 |
| 58 | 6 | 0 | -20.884023 | -4.039265 | 28.762464 |
| 59 | 1 | 0 | -20.297376 | -3.859331 | 27.857279 |
| 60 | 1 | 0 | -21.560854 | -4.871759 | 28.558267 |
| 61 | 1 | 0 | -21.509589 | -3.168901 | 28.985845 |
| 62 | 6 | 0 | -19.362957 | -2.069574 | 30.392256 |
| 63 | 1 | 0 | -19.813344 | -1.799620 | 29.428574 |
| 64 | 6 | 0 | -18.233291 | -1.073039 | 30.641890 |
| 65 | 1 | 0 | -18.674677 | -0.082232 | 30.763700 |
| 66 | 1 | 0 | -17.678440 | -1.292630 | 31.556573 |
| 67 | 1 | 0 | -17.529874 | -1.034452 | 29.804146 |
| 68 | 6 | 0 | -20.434588 | -1.964774 | 31.474966 |
| 69 | 1 | 0 | -20.754335 | -0.921568 | 31.555297 |
| 70 | 1 | 0 | -21.318205 | -2.568518 | 31.255305 |
| 71 | 1 | 0 | -20.045866 | -2.267255 | 32.451943 |
| 72 | 6 | 0 | -17.891962 | -3.915089 | 31.244210 |
| 73 | 1 | 0 | -18.119616 | -3.313602 | 32.130278 |
| 74 | 6 | 0 | -18.030288 | -5.379581 | 31.656788 |
| 75 | 1 | 0 | -17.301190 | -5.563099 | 32.449457 |
| 76 | 1 | 0 | -19.017136 | -5.625600 | 32.051063 |
| 77 | 1 | 0 | -17.792045 | -6.058703 | 30.832926 |
| 78 | 6 | 0 | -16.441233 | -3.662318 | 30.821140 |
| 79 | 1 | 0 | -16.289361 | -2.688739 | 30.355205 |
| 80 | 1 | 0 | -15.801503 | -3.719499 | 31.705536 |
| 81 | 1 | 0 | -16.108907 | -4.425809 | 30.112905 |
| 82 | 7 | 0 | -18.862635 | -3.467108 | 30.166395 |

-----  
**Re-TS8**  
 -----

| Center<br>Number | Atomic<br>Number | Atomic<br>Type | Coordinates (Angstroms) |           |           |
|------------------|------------------|----------------|-------------------------|-----------|-----------|
|                  |                  |                | X                       | Y         | Z         |
| 1                | 6                | 0              | -19.512330              | -1.615182 | 26.336878 |
| 2                | 6                | 0              | -18.783383              | -2.464801 | 27.236789 |
| 3                | 6                | 0              | -17.428996              | -2.723052 | 27.002110 |
| 4                | 6                | 0              | -16.803771              | -2.204101 | 25.870139 |
| 5                | 6                | 0              | -17.507521              | -1.387541 | 24.978943 |
| 6                | 6                | 0              | -18.841396              | -1.059892 | 25.223855 |
| 7                | 1                | 0              | -16.864858              | -3.352531 | 27.686464 |
| 8                | 1                | 0              | -15.759914              | -2.428482 | 25.677340 |
| 9                | 1                | 0              | -17.002995              | -0.963970 | 24.112301 |
| 10               | 6                | 0              | -19.744830              | -2.892193 | 28.200257 |
| 11               | 1                | 0              | -19.584375              | -3.545385 | 29.046808 |
| 12               | 6                | 0              | -20.935322              | -2.315544 | 27.805985 |
| 13               | 1                | 0              | -21.902859              | -2.436323 | 28.278938 |
| 14               | 7                | 0              | -20.821247              | -1.527980 | 26.685985 |
| 15               | 6                | 0              | -19.488193              | -0.010343 | 24.460853 |
| 16               | 8                | 0              | -20.108813              | 0.912131  | 24.946530 |
| 17               | 6                | 0              | -19.402300              | 0.039580  | 22.928163 |
| 18               | 7                | 0              | -19.375826              | -0.880474 | 21.944853 |
| 19               | 7                | 0              | -19.552009              | 1.217791  | 22.302558 |
| 20               | 6                | 0              | -19.549815              | -0.188795 | 20.764514 |
| 21               | 6                | 0              | -19.475042              | -2.383622 | 21.816252 |
| 22               | 7                | 0              | -19.636966              | 1.090817  | 20.956349 |
| 23               | 6                | 0              | -19.655826              | 2.517885  | 22.861133 |
| 24               | 6                | 0              | -19.559482              | -0.928895 | 19.470290 |
| 25               | 6                | 0              | -18.638604              | -2.807249 | 20.555955 |
| 26               | 1                | 0              | -20.546778              | -2.553141 | 21.690148 |
| 27               | 6                | 0              | -18.879959              | -3.290056 | 22.864129 |
| 28               | 6                | 0              | -18.652762              | 3.026960  | 23.675405 |
| 29               | 6                | 0              | -20.785856              | 3.277598  | 22.595972 |



|    |   |   |            |           |           |
|----|---|---|------------|-----------|-----------|
| 30 | 1 | 0 | -19.378336 | -0.235173 | 18.649785 |
| 31 | 1 | 0 | -20.527305 | -1.425074 | 19.315535 |
| 32 | 8 | 0 | -18.494241 | -1.846330 | 19.530857 |
| 33 | 1 | 0 | -19.147178 | -3.697422 | 20.162477 |
| 34 | 6 | 0 | -17.264512 | -3.188841 | 21.108629 |
| 35 | 6 | 0 | -17.636954 | -3.772097 | 22.442955 |
| 36 | 6 | 0 | -19.495423 | -3.789028 | 24.007169 |
| 37 | 6 | 0 | -18.782465 | 4.286255  | 24.236127 |
| 38 | 9 | 0 | -17.596818 | 2.273375  | 23.959118 |
| 39 | 6 | 0 | -20.924773 | 4.538812  | 23.156089 |
| 40 | 9 | 0 | -21.757176 | 2.790399  | 21.833443 |
| 41 | 1 | 0 | -16.734821 | -3.884864 | 20.455145 |
| 42 | 1 | 0 | -16.655110 | -2.282177 | 21.210038 |
| 43 | 6 | 0 | -16.964736 | -4.730267 | 23.190756 |
| 44 | 1 | 0 | -20.472170 | -3.429716 | 24.308808 |
| 45 | 6 | 0 | -18.817765 | -4.747622 | 24.755146 |
| 46 | 6 | 0 | -19.920445 | 5.041942  | 23.971438 |
| 47 | 9 | 0 | -17.831548 | 4.773712  | 25.021641 |
| 48 | 9 | 0 | -22.021480 | 5.250197  | 22.924691 |
| 49 | 1 | 0 | -16.004323 | -5.113866 | 22.860402 |
| 50 | 6 | 0 | -17.561232 | -5.207071 | 24.355904 |
| 51 | 1 | 0 | -19.272826 | -5.131443 | 25.662567 |
| 52 | 9 | 0 | -20.046909 | 6.245231  | 24.508909 |
| 53 | 1 | 0 | -17.050449 | -5.957396 | 24.951720 |
| 54 | 6 | 0 | -22.268689 | -1.218020 | 24.936826 |
| 55 | 8 | 0 | -21.604451 | -1.454278 | 23.930518 |
| 56 | 6 | 0 | -23.112780 | -2.391845 | 25.462259 |
| 57 | 9 | 0 | -24.168541 | -2.515186 | 24.632917 |
| 58 | 9 | 0 | -22.454303 | -3.550063 | 25.436091 |
| 59 | 9 | 0 | -23.610504 | -2.219948 | 26.691141 |
| 60 | 6 | 0 | -22.770116 | 0.159628  | 25.249837 |
| 61 | 6 | 0 | -22.920540 | 1.031750  | 24.168543 |
| 62 | 6 | 0 | -23.102873 | 0.586535  | 26.536954 |
| 63 | 6 | 0 | -23.409730 | 2.318852  | 24.368844 |
| 64 | 1 | 0 | -22.640393 | 0.690385  | 23.175853 |
| 65 | 6 | 0 | -23.584823 | 1.876085  | 26.735218 |
| 66 | 1 | 0 | -22.940628 | -0.077384 | 27.376944 |
| 67 | 6 | 0 | -23.742202 | 2.741737  | 25.654054 |
| 68 | 1 | 0 | -23.527022 | 2.994009  | 23.526834 |
| 69 | 1 | 0 | -23.829338 | 2.210129  | 27.738233 |
| 70 | 1 | 0 | -24.119578 | 3.747005  | 25.813285 |

-----  
**Si-TS8**  
 -----

| Center<br>Number | Atomic<br>Number | Atomic<br>Type | Coordinates (Angstroms) |           |           |
|------------------|------------------|----------------|-------------------------|-----------|-----------|
|                  |                  |                | X                       | Y         | Z         |
| 1                | 6                | 0              | -11.660236              | -2.135346 | 26.002168 |
| 2                | 6                | 0              | -11.369831              | -2.315295 | 27.399006 |
| 3                | 6                | 0              | -10.849817              | -1.253757 | 28.148113 |
| 4                | 6                | 0              | -10.636974              | -0.019170 | 27.540980 |
| 5                | 6                | 0              | -10.907254              | 0.162338  | 26.179234 |
| 6                | 6                | 0              | -11.373383              | -0.893653 | 25.391680 |
| 7                | 1                | 0              | -10.607222              | -1.392126 | 29.198776 |
| 8                | 1                | 0              | -10.237614              | 0.808020  | 28.117999 |
| 9                | 1                | 0              | -10.696008              | 1.114585  | 25.702301 |
| 10               | 6                | 0              | -11.704835              | -3.675246 | 27.675636 |
| 11               | 1                | 0              | -11.628163              | -4.189868 | 28.623293 |
| 12               | 6                | 0              | -12.164573              | -4.189858 | 26.481580 |
| 13               | 1                | 0              | -12.527666              | -5.195075 | 26.294916 |
| 14               | 7                | 0              | -12.138804              | -3.282801 | 25.453084 |

|    |   |   |            |           |           |
|----|---|---|------------|-----------|-----------|
| 15 | 6 | 0 | -11.431538 | -0.645800 | 23.942840 |
| 16 | 8 | 0 | -11.942310 | 0.322152  | 23.422787 |
| 17 | 6 | 0 | -10.742975 | -1.624016 | 23.000175 |
| 18 | 7 | 0 | -10.975781 | -1.719532 | 21.681115 |
| 19 | 7 | 0 | -9.942647  | -2.651120 | 23.298844 |
| 20 | 6 | 0 | -10.455814 | -2.928000 | 21.283322 |
| 21 | 6 | 0 | -11.896905 | -0.975687 | 20.806254 |
| 22 | 7 | 0 | -9.774388  | -3.487120 | 22.243929 |
| 23 | 6 | 0 | -9.238814  | -2.871616 | 24.507161 |
| 24 | 6 | 0 | -10.789236 | -3.567439 | 19.957399 |
| 25 | 6 | 0 | -11.792410 | -1.605816 | 19.407218 |
| 26 | 1 | 0 | -12.893670 | -1.147341 | 21.231579 |
| 27 | 6 | 0 | -11.716745 | 0.479753  | 20.410447 |
| 28 | 6 | 0 | -9.311513  | -4.101169 | 25.152157 |
| 29 | 6 | 0 | -8.542277  | -1.817659 | 25.092484 |
| 30 | 1 | 0 | -10.966031 | -4.629380 | 20.132168 |
| 31 | 1 | 0 | -9.952513  | -3.450157 | 19.256537 |
| 32 | 8 | 0 | -11.971846 | -2.996959 | 19.433341 |
| 33 | 1 | 0 | -10.780712 | -1.386138 | 19.028446 |
| 34 | 6 | 0 | -12.764561 | -0.744181 | 18.611804 |
| 35 | 6 | 0 | -12.330061 | 0.608630  | 19.149568 |
| 36 | 6 | 0 | -11.097365 | 1.566897  | 21.009103 |
| 37 | 6 | 0 | -8.735553  | -4.255742 | 26.404016 |
| 38 | 9 | 0 | -9.951123  | -5.120403 | 24.602133 |
| 39 | 6 | 0 | -7.976384  | -1.965390 | 26.346583 |
| 40 | 9 | 0 | -8.468388  | -0.643807 | 24.468612 |
| 41 | 1 | 0 | -12.642586 | -0.838414 | 17.531921 |
| 42 | 1 | 0 | -13.799453 | -0.989627 | 18.878229 |
| 43 | 6 | 0 | -12.382420 | 1.841052  | 18.515669 |
| 44 | 1 | 0 | -10.592796 | 1.469404  | 21.961238 |
| 45 | 6 | 0 | -11.140101 | 2.801179  | 20.357575 |
| 46 | 6 | 0 | -8.078218  | -3.187499 | 26.999529 |
| 47 | 9 | 0 | -8.823465  | -5.417579 | 27.038653 |
| 48 | 9 | 0 | -7.341591  | -0.951136 | 26.921505 |
| 49 | 1 | 0 | -12.852239 | 1.938671  | 17.541704 |
| 50 | 6 | 0 | -11.791781 | 2.943681  | 19.134762 |
| 51 | 1 | 0 | -10.658335 | 3.659305  | 20.814430 |
| 52 | 9 | 0 | -7.549553  | -3.330324 | 28.206049 |
| 53 | 1 | 0 | -11.819987 | 3.913356  | 18.648382 |
| 54 | 6 | 0 | -14.730513 | -5.626389 | 24.511446 |
| 55 | 6 | 0 | -13.654900 | -4.982232 | 23.897307 |
| 56 | 6 | 0 | -12.616256 | -5.733514 | 23.343229 |
| 57 | 6 | 0 | -12.639626 | -7.119599 | 23.419071 |
| 58 | 6 | 0 | -13.714186 | -7.764678 | 24.033501 |
| 59 | 6 | 0 | -14.758747 | -7.018459 | 24.571455 |
| 60 | 1 | 0 | -15.546099 | -5.056098 | 24.941657 |
| 61 | 1 | 0 | -11.784616 | -5.210441 | 22.882634 |
| 62 | 1 | 0 | -11.822618 | -7.699600 | 23.002010 |
| 63 | 1 | 0 | -13.735045 | -8.848158 | 24.092639 |
| 64 | 1 | 0 | -15.597372 | -7.518213 | 25.044767 |
| 65 | 6 | 0 | -13.559066 | -3.496751 | 23.769827 |
| 66 | 8 | 0 | -13.028825 | -2.967137 | 22.798302 |
| 67 | 6 | 0 | -14.595634 | -2.635196 | 24.517105 |
| 68 | 9 | 0 | -14.237150 | -1.351369 | 24.510109 |
| 69 | 9 | 0 | -15.765255 | -2.732806 | 23.850284 |
| 70 | 9 | 0 | -14.841863 | -2.995302 | 25.779151 |

---

**Re-TS9**

| Center<br>Number | Atomic<br>Number | Atomic<br>Type | Coordinates (Angstroms) |           |           |
|------------------|------------------|----------------|-------------------------|-----------|-----------|
|                  |                  |                | X                       | Y         | Z         |
| 1                | 6                | 0              | -18.950359              | -1.344691 | 25.909752 |
| 2                | 6                | 0              | -18.143711              | -2.117123 | 26.761596 |
| 3                | 6                | 0              | -16.751778              | -1.957071 | 26.639158 |
| 4                | 6                | 0              | -16.261338              | -1.040095 | 25.715907 |
| 5                | 6                | 0              | -17.110056              | -0.274623 | 24.888541 |
| 6                | 6                | 0              | -18.483241              | -0.431599 | 24.968954 |
| 7                | 1                | 0              | -16.068301              | -2.537916 | 27.250211 |
| 8                | 1                | 0              | -15.188382              | -0.913878 | 25.617052 |
| 9                | 1                | 0              | -16.690356              | 0.422281  | 24.168849 |
| 10               | 6                | 0              | -19.059759              | -2.898501 | 27.555515 |
| 11               | 1                | 0              | -18.810476              | -3.635089 | 28.305049 |
| 12               | 6                | 0              | -20.330959              | -2.550572 | 27.180184 |
| 13               | 1                | 0              | -21.283305              | -2.904190 | 27.546301 |
| 14               | 7                | 0              | -20.268737              | -1.613693 | 26.159418 |
| 15               | 6                | 0              | -19.516059              | 0.293977  | 24.148555 |
| 16               | 8                | 0              | -19.471539              | 1.495713  | 23.934035 |
| 17               | 6                | 0              | -19.088235              | -0.585706 | 22.332200 |
| 18               | 7                | 0              | -18.780456              | 0.133562  | 21.228485 |
| 19               | 7                | 0              | -18.442146              | -1.738838 | 22.100567 |
| 20               | 6                | 0              | -17.947731              | -0.606091 | 20.421805 |
| 21               | 6                | 0              | -19.264593              | 1.489711  | 20.901890 |
| 22               | 7                | 0              | -17.720562              | -1.778636 | 20.932471 |
| 23               | 6                | 0              | -18.475441              | -2.839378 | 22.980721 |
| 24               | 6                | 0              | -17.387120              | -0.039756 | 19.154240 |
| 25               | 6                | 0              | -18.756987              | 1.873472  | 19.484077 |
| 26               | 1                | 0              | -18.899387              | 2.153349  | 21.687033 |
| 27               | 6                | 0              | -20.766435              | 1.525764  | 20.732940 |
| 28               | 6                | 0              | -19.705404              | -3.369119 | 23.360520 |
| 29               | 6                | 0              | -17.307858              | -3.327477 | 23.557070 |
| 30               | 1                | 0              | -17.904743              | -0.465264 | 18.286125 |
| 31               | 1                | 0              | -16.330083              | -0.299245 | 19.078262 |
| 32               | 8                | 0              | -17.470652              | 1.368888  | 19.183628 |
| 33               | 1                | 0              | -18.644293              | 2.959577  | 19.471729 |
| 34               | 6                | 0              | -19.885161              | 1.479964  | 18.505103 |
| 35               | 6                | 0              | -21.111004              | 1.528195  | 19.379679 |
| 36               | 6                | 0              | -21.739004              | 1.551174  | 21.726473 |
| 37               | 6                | 0              | -19.772697              | -4.345984 | 24.342997 |
| 38               | 9                | 0              | -20.818845              | -2.938132 | 22.785741 |
| 39               | 6                | 0              | -17.367921              | -4.323418 | 24.518547 |
| 40               | 9                | 0              | -16.132170              | -2.813938 | 23.218148 |
| 41               | 1                | 0              | -19.930238              | 2.158852  | 17.650671 |
| 42               | 1                | 0              | -19.744995              | 0.468462  | 18.107377 |
| 43               | 6                | 0              | -22.448930              | 1.558460  | 19.000059 |
| 44               | 1                | 0              | -21.443140              | 1.557613  | 22.769719 |
| 45               | 6                | 0              | -23.078603              | 1.571225  | 21.342415 |
| 46               | 6                | 0              | -18.601839              | -4.817954 | 24.921007 |
| 47               | 9                | 0              | -20.946069              | -4.832201 | 24.733325 |
| 48               | 9                | 0              | -16.257699              | -4.755475 | 25.108763 |
| 49               | 1                | 0              | -22.725570              | 1.568047  | 17.949962 |
| 50               | 6                | 0              | -23.429512              | 1.576141  | 19.990864 |
| 51               | 1                | 0              | -23.855269              | 1.587718  | 22.100887 |
| 52               | 9                | 0              | -18.662710              | -5.737721 | 25.875335 |
| 53               | 1                | 0              | -24.477347              | 1.598087  | 19.708054 |
| 54               | 6                | 0              | -21.218683              | -0.659519 | 25.603253 |
| 55               | 8                | 0              | -20.812520              | -0.346620 | 24.292853 |
| 56               | 6                | 0              | -22.572544              | -1.368608 | 25.430129 |

|    |   |   |            |           |           |
|----|---|---|------------|-----------|-----------|
| 57 | 9 | 0 | -23.430045 | -0.608840 | 24.749775 |
| 58 | 9 | 0 | -22.438244 | -2.528208 | 24.788302 |
| 59 | 9 | 0 | -23.109457 | -1.629781 | 26.631905 |
| 60 | 6 | 0 | -21.374149 | 0.585935  | 26.474165 |
| 61 | 6 | 0 | -20.897665 | 0.628693  | 27.782874 |
| 62 | 6 | 0 | -22.016867 | 1.701601  | 25.931790 |
| 63 | 6 | 0 | -21.068132 | 1.781419  | 28.547192 |
| 64 | 1 | 0 | -20.385697 | -0.228766 | 28.209023 |
| 65 | 6 | 0 | -22.188699 | 2.847651  | 26.698287 |
| 66 | 1 | 0 | -22.370469 | 1.667630  | 24.907045 |
| 67 | 6 | 0 | -21.714606 | 2.889384  | 28.008779 |
| 68 | 1 | 0 | -20.689780 | 1.811390  | 29.563570 |
| 69 | 1 | 0 | -22.684788 | 3.712166  | 26.269764 |
| 70 | 1 | 0 | -21.843966 | 3.786920  | 28.605037 |

-----  
**Si-TS9**  
 -----

| Center<br>Number | Atomic<br>Number | Atomic<br>Type | Coordinates (Angstroms) |           |           |
|------------------|------------------|----------------|-------------------------|-----------|-----------|
|                  |                  |                | X                       | Y         | Z         |
| 1                | 6                | 0              | -18.799563              | -1.333888 | 25.863699 |
| 2                | 6                | 0              | -18.126301              | -2.211233 | 26.727737 |
| 3                | 6                | 0              | -16.724699              | -2.103739 | 26.782397 |
| 4                | 6                | 0              | -16.092507              | -1.142508 | 26.001790 |
| 5                | 6                | 0              | -16.811296              | -0.279770 | 25.147511 |
| 6                | 6                | 0              | -18.189272              | -0.378097 | 25.066709 |
| 7                | 1                | 0              | -16.140325              | -2.763686 | 27.416407 |
| 8                | 1                | 0              | -15.011701              | -1.056859 | 26.041189 |
| 9                | 1                | 0              | -16.292366              | 0.454878  | 24.539812 |
| 10               | 6                | 0              | -19.154379              | -3.028457 | 27.324123 |
| 11               | 1                | 0              | -19.019116              | -3.839790 | 28.024391 |
| 12               | 6                | 0              | -20.355206              | -2.611251 | 26.818792 |
| 13               | 1                | 0              | -21.351098              | -2.981165 | 27.011977 |
| 14               | 7                | 0              | -20.147091              | -1.587879 | 25.902986 |
| 15               | 6                | 0              | -19.066755              | 0.434536  | 24.160880 |
| 16               | 8                | 0              | -18.790896              | 1.592756  | 23.851635 |
| 17               | 6                | 0              | -18.833577              | -0.586527 | 22.496625 |
| 18               | 7                | 0              | -18.759152              | 0.038815  | 21.297995 |
| 19               | 7                | 0              | -18.214853              | -1.751308 | 22.255081 |
| 20               | 6                | 0              | -18.075002              | -0.769617 | 20.417775 |
| 21               | 6                | 0              | -19.302356              | 1.371079  | 20.926155 |
| 22               | 7                | 0              | -17.731305              | -1.889193 | 20.976262 |
| 23               | 6                | 0              | -18.086440              | -2.834324 | 23.153760 |
| 24               | 6                | 0              | -17.796092              | -0.366055 | 19.001962 |
| 25               | 6                | 0              | -19.249786              | 1.462887  | 19.381366 |
| 26               | 1                | 0              | -18.702110              | 2.122100  | 21.439128 |
| 27               | 6                | 0              | -20.789681              | 1.483493  | 21.174603 |
| 28               | 6                | 0              | -19.218895              | -3.496394 | 23.618892 |
| 29               | 6                | 0              | -16.829248              | -3.255942 | 23.568073 |
| 30               | 1                | 0              | -18.401009              | -0.975140 | 18.318847 |
| 31               | 1                | 0              | -16.743756              | -0.546546 | 18.776024 |
| 32               | 8                | 0              | -18.034245              | 1.011259  | 18.825895 |
| 33               | 1                | 0              | -19.310715              | 2.522877  | 19.124322 |
| 34               | 6                | 0              | -20.541675              | 0.761499  | 18.904557 |
| 35               | 6                | 0              | -21.492491              | 1.103544  | 20.024485 |
| 36               | 6                | 0              | -21.455116              | 1.954497  | 22.300563 |
| 37               | 6                | 0              | -19.098722              | -4.561987 | 24.495920 |
| 38               | 9                | 0              | -20.427550              | -3.099554 | 23.237471 |
| 39               | 6                | 0              | -16.701376              | -4.324912 | 24.442327 |
| 40               | 9                | 0              | -15.743623              | -2.616029 | 23.155092 |
| 41               | 1                | 0              | -20.869584              | 1.123301  | 17.927801 |

|    |   |   |            |           |           |
|----|---|---|------------|-----------|-----------|
| 42 | 1 | 0 | -20.408880 | -0.324457 | 18.827427 |
| 43 | 6 | 0 | -22.882032 | 1.128286  | 20.011924 |
| 44 | 1 | 0 | -20.893481 | 2.265743  | 23.172465 |
| 45 | 6 | 0 | -22.849394 | 1.977674  | 22.284137 |
| 46 | 6 | 0 | -17.837279 | -4.972761 | 24.906191 |
| 47 | 9 | 0 | -20.181227 | -5.172758 | 24.964786 |
| 48 | 9 | 0 | -15.501371 | -4.691490 | 24.880641 |
| 49 | 1 | 0 | -23.433378 | 0.837912  | 19.122610 |
| 50 | 6 | 0 | -23.555514 | 1.556158  | 21.156980 |
| 51 | 1 | 0 | -23.389040 | 2.322597  | 23.160586 |
| 52 | 9 | 0 | -17.721859 | -5.960003 | 25.785002 |
| 53 | 1 | 0 | -24.640920 | 1.578381  | 21.163805 |
| 54 | 6 | 0 | -21.054174 | -0.561647 | 25.398635 |
| 55 | 8 | 0 | -20.478522 | 0.144355  | 24.339453 |
| 56 | 6 | 0 | -21.272337 | 0.483056  | 26.521251 |
| 57 | 9 | 0 | -22.187913 | 1.382412  | 26.159057 |
| 58 | 9 | 0 | -20.132788 | 1.134030  | 26.782098 |
| 59 | 9 | 0 | -21.674165 | -0.083224 | 27.670081 |
| 60 | 6 | 0 | -22.379649 | -1.144880 | 24.915471 |
| 61 | 6 | 0 | -23.348528 | -1.608004 | 25.810989 |
| 62 | 6 | 0 | -22.620091 | -1.217928 | 23.542738 |
| 63 | 6 | 0 | -24.537260 | -2.153373 | 25.332949 |
| 64 | 1 | 0 | -23.194929 | -1.534750 | 26.881581 |
| 65 | 6 | 0 | -23.813014 | -1.757858 | 23.071501 |
| 66 | 1 | 0 | -21.874995 | -0.839412 | 22.851656 |
| 67 | 6 | 0 | -24.772677 | -2.230009 | 23.963057 |
| 68 | 1 | 0 | -25.281534 | -2.510896 | 26.036695 |
| 69 | 1 | 0 | -23.992707 | -1.799519 | 22.001916 |
| 70 | 1 | 0 | -25.702850 | -2.648752 | 23.592752 |

-----  
**Si-INT1**  
 -----

| Center<br>Number | Atomic<br>Number | Atomic<br>Type | Coordinates (Angstroms) |           |           |
|------------------|------------------|----------------|-------------------------|-----------|-----------|
|                  |                  |                | X                       | Y         | Z         |
| 1                | 6                | 0              | -3.597724               | 0.584435  | -1.031536 |
| 2                | 6                | 0              | -3.241815               | 1.710113  | -0.247879 |
| 3                | 6                | 0              | -4.215396               | 2.301273  | 0.576889  |
| 4                | 6                | 0              | -5.489475               | 1.759437  | 0.598570  |
| 5                | 6                | 0              | -5.825216               | 0.656318  | -0.212458 |
| 6                | 6                | 0              | -4.898322               | 0.058010  | -1.047096 |
| 7                | 1                | 0              | -3.967847               | 3.168939  | 1.181026  |
| 8                | 1                | 0              | -6.252141               | 2.203862  | 1.231437  |
| 9                | 1                | 0              | -6.831760               | 0.249795  | -0.234589 |
| 10               | 6                | 0              | -1.862075               | 1.994417  | -0.528883 |
| 11               | 1                | 0              | -1.263533               | 2.788933  | -0.108560 |
| 12               | 6                | 0              | -1.441585               | 1.064656  | -1.436134 |
| 13               | 1                | 0              | -0.472274               | 0.927004  | -1.892385 |
| 14               | 7                | 0              | -2.482187               | 0.219174  | -1.752732 |
| 15               | 1                | 0              | -2.386242               | -0.605837 | -2.322111 |
| 16               | 6                | 0              | -5.343402               | -1.087689 | -1.966697 |
| 17               | 1                | 0              | -4.615428               | -1.928575 | -1.792797 |
| 18               | 8                | 0              | -6.631115               | -1.410582 | -1.917990 |
| 19               | 6                | 0              | -5.065750               | -0.698383 | -3.437196 |
| 20               | 7                | 0              | -4.673871               | -1.497419 | -4.445718 |
| 21               | 7                | 0              | -5.357623               | 0.463523  | -4.029062 |
| 22               | 6                | 0              | -4.671918               | -0.739573 | -5.603081 |
| 23               | 6                | 0              | -4.116365               | -2.855452 | -4.444169 |
| 24               | 7                | 0              | -5.106721               | 0.460898  | -5.374199 |
| 25               | 6                | 0              | -5.910034               | 1.596321  | -3.384281 |
| 26               | 6                | 0              | -4.160549               | -1.275409 | -6.918660 |

|    |   |   |           |           |           |
|----|---|---|-----------|-----------|-----------|
| 27 | 6 | 0 | -4.060569 | -3.324281 | -5.903819 |
| 28 | 1 | 0 | -3.087134 | -2.771220 | -4.071309 |
| 29 | 6 | 0 | -4.785705 | -4.059887 | -3.811442 |
| 30 | 6 | 0 | -5.074899 | 2.611291  | -2.929355 |
| 31 | 6 | 0 | -7.270391 | 1.629026  | -3.103910 |
| 32 | 1 | 0 | -3.553668 | -0.508550 | -7.400776 |
| 33 | 1 | 0 | -5.012516 | -1.518004 | -7.567396 |
| 34 | 8 | 0 | -3.350413 | -2.417989 | -6.710363 |
| 35 | 1 | 0 | -5.099012 | -3.397485 | -6.265356 |
| 36 | 6 | 0 | -3.513677 | -4.739165 | -5.752228 |
| 37 | 6 | 0 | -4.327437 | -5.171599 | -4.544087 |
| 38 | 6 | 0 | -5.657375 | -4.206857 | -2.740614 |
| 39 | 6 | 0 | -5.590713 | 3.646669  | -2.169381 |
| 40 | 9 | 0 | -3.776392 | 2.566679  | -3.191528 |
| 41 | 6 | 0 | -7.794418 | 2.674405  | -2.357386 |
| 42 | 9 | 0 | -8.069019 | 0.675207  | -3.550417 |
| 43 | 1 | 0 | -3.678652 | -5.363555 | -6.631484 |
| 44 | 1 | 0 | -2.438109 | -4.705914 | -5.538244 |
| 45 | 6 | 0 | -4.696152 | -6.454429 | -4.168581 |
| 46 | 1 | 0 | -6.095406 | -3.340807 | -2.239210 |
| 47 | 6 | 0 | -6.026354 | -5.506944 | -2.379697 |
| 48 | 6 | 0 | -6.950597 | 3.669758  | -1.883253 |
| 49 | 9 | 0 | -4.796239 | 4.599667  | -1.696660 |
| 50 | 9 | 0 | -9.094207 | 2.722826  | -2.084521 |
| 51 | 1 | 0 | -4.352345 | -7.315104 | -4.734406 |
| 52 | 6 | 0 | -5.541155 | -6.615901 | -3.068720 |
| 53 | 1 | 0 | -6.713706 | -5.650200 | -1.552008 |
| 54 | 9 | 0 | -7.446449 | 4.655789  | -1.149407 |
| 55 | 1 | 0 | -5.843491 | -7.613326 | -2.765867 |

-----  
**Re-INT1**  
 -----

| Center<br>Number | Atomic<br>Number | Atomic<br>Type | Coordinates (Angstroms) |           |           |
|------------------|------------------|----------------|-------------------------|-----------|-----------|
|                  |                  |                | X                       | Y         | Z         |
| 1                | 6                | 0              | -3.101528               | -2.175192 | -2.764785 |
| 2                | 6                | 0              | -2.279374               | -3.283057 | -2.446143 |
| 3                | 6                | 0              | -2.831802               | -4.349027 | -1.711871 |
| 4                | 6                | 0              | -4.161077               | -4.279325 | -1.331455 |
| 5                | 6                | 0              | -4.963447               | -3.174293 | -1.684385 |
| 6                | 6                | 0              | -4.461064               | -2.117868 | -2.420532 |
| 7                | 1                | 0              | -2.224207               | -5.211995 | -1.455686 |
| 8                | 1                | 0              | -4.600444               | -5.093119 | -0.763027 |
| 9                | 1                | 0              | -6.010648               | -3.119195 | -1.406615 |
| 10               | 6                | 0              | -0.991192               | -3.026673 | -3.029881 |
| 11               | 1                | 0              | -0.119656               | -3.663429 | -2.990403 |
| 12               | 6                | 0              | -1.073012               | -1.815874 | -3.659549 |
| 13               | 1                | 0              | -0.324516               | -1.266013 | -4.210845 |
| 14               | 7                | 0              | -2.341568               | -1.299201 | -3.507336 |
| 15               | 1                | 0              | -2.631927               | -0.391667 | -3.836767 |
| 16               | 6                | 0              | -5.380012               | -0.958590 | -2.812960 |
| 17               | 1                | 0              | -4.760917               | -0.028437 | -2.660798 |
| 18               | 8                | 0              | -6.583481               | -0.944891 | -2.253579 |
| 19               | 6                | 0              | -5.632978               | -0.918395 | -4.341084 |
| 20               | 7                | 0              | -6.388040               | 0.036289  | -4.921951 |
| 21               | 7                | 0              | -5.367329               | -1.783486 | -5.329023 |
| 22               | 6                | 0              | -6.552628               | -0.318007 | -6.246832 |
| 23               | 6                | 0              | -7.181884               | 1.186181  | -4.406761 |
| 24               | 7                | 0              | -5.934789               | -1.423448 | -6.522067 |
| 25               | 6                | 0              | -4.577094               | -2.960096 | -5.292138 |
| 26               | 6                | 0              | -7.303185               | 0.513121  | -7.258290 |

|    |   |   |           |           |           |
|----|---|---|-----------|-----------|-----------|
| 27 | 6 | 0 | -7.286181 | 2.130522  | -5.620518 |
| 28 | 1 | 0 | -8.167756 | 0.769282  | -4.171239 |
| 29 | 6 | 0 | -6.760476 | 2.150397  | -3.307287 |
| 30 | 6 | 0 | -5.056527 | -4.115049 | -4.688004 |
| 31 | 6 | 0 | -3.303968 | -2.942474 | -5.848765 |
| 32 | 1 | 0 | -7.991461 | -0.128337 | -7.810593 |
| 33 | 1 | 0 | -6.568348 | 0.929156  | -7.961284 |
| 34 | 8 | 0 | -8.047763 | 1.543550  | -6.647642 |
| 35 | 1 | 0 | -6.258947 | 2.316032  | -5.976669 |
| 36 | 6 | 0 | -7.831331 | 3.427795  | -5.058652 |
| 37 | 6 | 0 | -7.150868 | 3.440072  | -3.709285 |
| 38 | 6 | 0 | -6.286191 | 1.937823  | -2.014467 |
| 39 | 6 | 0 | -4.244444 | -5.234516 | -4.592190 |
| 40 | 9 | 0 | -6.274487 | -4.134901 | -4.166860 |
| 41 | 6 | 0 | -2.491957 | -4.061700 | -5.768085 |
| 42 | 9 | 0 | -2.844290 | -1.833674 | -6.417318 |
| 43 | 1 | 0 | -7.601897 | 4.292079  | -5.684219 |
| 44 | 1 | 0 | -8.920004 | 3.358635  | -4.943523 |
| 45 | 6 | 0 | -6.967250 | 4.533247  | -2.872404 |
| 46 | 1 | 0 | -6.157909 | 0.921746  | -1.653684 |
| 47 | 6 | 0 | -6.092589 | 3.042619  | -1.184801 |
| 48 | 6 | 0 | -2.966932 | -5.203487 | -5.135840 |
| 49 | 9 | 0 | -4.678767 | -6.329241 | -3.979230 |
| 50 | 9 | 0 | -1.263326 | -4.041310 | -6.271836 |
| 51 | 1 | 0 | -7.264240 | 5.526167  | -3.196435 |
| 52 | 6 | 0 | -6.409841 | 4.331335  | -1.611516 |
| 53 | 1 | 0 | -5.706386 | 2.890129  | -0.181934 |
| 54 | 9 | 0 | -2.181823 | -6.266074 | -5.026503 |
| 55 | 1 | 0 | -6.250088 | 5.176102  | -0.948827 |

-----

## INT2

-----

| Center<br>Number | Atomic<br>Number | Atomic<br>Type | Coordinates (Angstroms) |           |           |
|------------------|------------------|----------------|-------------------------|-----------|-----------|
|                  |                  |                | X                       | Y         | Z         |
| 1                | 6                | 0              | -4.445869               | 0.567253  | -0.796839 |
| 2                | 6                | 0              | -4.339813               | 1.585757  | 0.182443  |
| 3                | 6                | 0              | -5.498872               | 1.999404  | 0.859156  |
| 4                | 6                | 0              | -6.707950               | 1.394152  | 0.551193  |
| 5                | 6                | 0              | -6.797035               | 0.406689  | -0.445017 |
| 6                | 6                | 0              | -5.675823               | -0.005454 | -1.160178 |
| 7                | 1                | 0              | -5.445275               | 2.780477  | 1.611406  |
| 8                | 1                | 0              | -7.610060               | 1.700312  | 1.070535  |
| 9                | 1                | 0              | -7.760464               | -0.023001 | -0.699920 |
| 10               | 6                | 0              | -2.956938               | 1.973086  | 0.225567  |
| 11               | 1                | 0              | -2.511982               | 2.725129  | 0.859918  |
| 12               | 6                | 0              | -2.299372               | 1.198231  | -0.689136 |
| 13               | 1                | 0              | -1.254696               | 1.179942  | -0.962474 |
| 14               | 7                | 0              | -3.189272               | 0.345276  | -1.301944 |
| 15               | 1                | 0              | -2.964376               | -0.305113 | -2.040205 |
| 16               | 6                | 0              | -5.795952               | -0.920519 | -2.302330 |
| 17               | 8                | 0              | -6.596979               | -2.011038 | -2.081812 |
| 18               | 6                | 0              | -5.236241               | -0.721039 | -3.513473 |
| 19               | 7                | 0              | -5.405839               | -1.627152 | -4.600741 |
| 20               | 7                | 0              | -4.665361               | 0.460084  | -4.082424 |
| 21               | 6                | 0              | -5.207451               | -0.801050 | -5.741159 |
| 22               | 6                | 0              | -4.519580               | -2.809150 | -4.787230 |
| 23               | 7                | 0              | -4.810105               | 0.383802  | -5.483675 |
| 24               | 6                | 0              | -4.887928               | 1.739052  | -3.521699 |
| 25               | 6                | 0              | -5.364569               | -1.397187 | -7.110571 |
| 26               | 6                | 0              | -4.965334               | -3.445155 | -6.113072 |

|    |   |   |           |           |           |
|----|---|---|-----------|-----------|-----------|
| 27 | 1 | 0 | -3.482210 | -2.450880 | -4.903934 |
| 28 | 6 | 0 | -4.515446 | -4.000327 | -3.857332 |
| 29 | 6 | 0 | -3.797664 | 2.550856  | -3.217870 |
| 30 | 6 | 0 | -6.158292 | 2.175403  | -3.148772 |
| 31 | 1 | 0 | -4.969679 | -0.709468 | -7.857532 |
| 32 | 1 | 0 | -6.432713 | -1.574724 | -7.299954 |
| 33 | 8 | 0 | -4.646517 | -2.621297 | -7.210954 |
| 34 | 1 | 0 | -6.058893 | -3.572797 | -6.047750 |
| 35 | 6 | 0 | -4.304369 | -4.816087 | -6.116565 |
| 36 | 6 | 0 | -4.361399 | -5.155900 | -4.641504 |
| 37 | 6 | 0 | -4.481553 | -4.080099 | -2.469598 |
| 38 | 6 | 0 | -3.956701 | 3.729975  | -2.506250 |
| 39 | 9 | 0 | -2.568512 | 2.166785  | -3.549672 |
| 40 | 6 | 0 | -6.330989 | 3.340561  | -2.418228 |
| 41 | 9 | 0 | -7.226029 | 1.435335  | -3.438124 |
| 42 | 1 | 0 | -4.811956 | -5.539035 | -6.757922 |
| 43 | 1 | 0 | -3.264372 | -4.724354 | -6.454128 |
| 44 | 6 | 0 | -4.239381 | -6.402768 | -4.042606 |
| 45 | 1 | 0 | -4.546885 | -3.189397 | -1.856192 |
| 46 | 6 | 0 | -4.366074 | -5.336247 | -1.872559 |
| 47 | 6 | 0 | -5.226284 | 4.118683  | -2.100774 |
| 48 | 9 | 0 | -2.901272 | 4.476525  | -2.189819 |
| 49 | 9 | 0 | -7.545646 | 3.717117  | -2.025598 |
| 50 | 1 | 0 | -4.131802 | -7.296898 | -4.649600 |
| 51 | 6 | 0 | -4.254468 | -6.487846 | -2.650421 |
| 52 | 1 | 0 | -4.355697 | -5.414178 | -0.790337 |
| 53 | 9 | 0 | -5.383843 | 5.236079  | -1.400230 |
| 54 | 1 | 0 | -4.166222 | -7.456587 | -2.169024 |
| 55 | 1 | 0 | -6.847542 | -2.377351 | -2.945416 |

### INT3

| Center<br>Number | Atomic<br>Number | Atomic<br>Type | Coordinates (Angstroms) |           |           |
|------------------|------------------|----------------|-------------------------|-----------|-----------|
|                  |                  |                | X                       | Y         | Z         |
| 1                | 6                | 0              | -3.176113               | -2.301731 | -3.361235 |
| 2                | 6                | 0              | -2.260618               | -3.382029 | -3.463044 |
| 3                | 6                | 0              | -2.438524               | -4.518094 | -2.659010 |
| 4                | 6                | 0              | -3.503183               | -4.552475 | -1.775594 |
| 5                | 6                | 0              | -4.417567               | -3.487101 | -1.704600 |
| 6                | 6                | 0              | -4.280686               | -2.352532 | -2.491916 |
| 7                | 1                | 0              | -1.752917               | -5.355803 | -2.738071 |
| 8                | 1                | 0              | -3.659703               | -5.423011 | -1.147116 |
| 9                | 1                | 0              | -5.284208               | -3.554637 | -1.056615 |
| 10               | 6                | 0              | -1.309196               | -3.033665 | -4.478569 |
| 11               | 1                | 0              | -0.473767               | -3.629772 | -4.813205 |
| 12               | 6                | 0              | -1.661140               | -1.802648 | -4.946033 |
| 13               | 1                | 0              | -1.198750               | -1.184370 | -5.701070 |
| 14               | 7                | 0              | -2.791924               | -1.358587 | -4.291376 |
| 15               | 1                | 0              | -3.146825               | -0.419142 | -4.386791 |
| 16               | 6                | 0              | -5.387597               | -1.299989 | -2.481630 |
| 17               | 1                | 0              | -5.035506               | -0.340507 | -2.084058 |
| 18               | 8                | 0              | -6.510770               | -1.725372 | -1.788348 |
| 19               | 6                | 0              | -5.821586               | -1.032026 | -3.914205 |
| 20               | 7                | 0              | -5.854059               | 0.105547  | -4.623223 |
| 21               | 7                | 0              | -6.344751               | -1.964196 | -4.709075 |
| 22               | 6                | 0              | -6.462312               | -0.199243 | -5.834004 |
| 23               | 6                | 0              | -5.547423               | 1.516906  | -4.292432 |
| 24               | 7                | 0              | -6.752301               | -1.462484 | -5.904112 |
| 25               | 6                | 0              | -6.391124               | -3.355796 | -4.427837 |
| 26               | 6                | 0              | -6.741204               | 0.834265  | -6.896554 |



|    |   |   |           |           |           |
|----|---|---|-----------|-----------|-----------|
| 27 | 6 | 0 | -5.472136 | 2.265356  | -5.634850 |
| 28 | 1 | 0 | -6.420165 | 1.887466  | -3.742098 |
| 29 | 6 | 0 | -4.269678 | 2.015936  | -3.625654 |
| 30 | 6 | 0 | -7.384038 | -3.891085 | -3.617277 |
| 31 | 6 | 0 | -5.353316 | -4.156994 | -4.896621 |
| 32 | 1 | 0 | -7.747025 | 0.678319  | -7.287225 |
| 33 | 1 | 0 | -6.016301 | 0.707528  | -7.711464 |
| 34 | 8 | 0 | -6.668260 | 2.136349  | -6.354930 |
| 35 | 1 | 0 | -4.638631 | 1.831908  | -6.211847 |
| 36 | 6 | 0 | -5.081215 | 3.667657  | -5.201177 |
| 37 | 6 | 0 | -4.074095 | 3.320353  | -4.126573 |
| 38 | 6 | 0 | -3.396257 | 1.511152  | -2.664294 |
| 39 | 6 | 0 | -7.308804 | -5.223700 | -3.236054 |
| 40 | 9 | 0 | -8.389405 | -3.144730 | -3.195907 |
| 41 | 6 | 0 | -5.273874 | -5.484731 | -4.515793 |
| 42 | 9 | 0 | -4.419298 | -3.628406 | -5.673665 |
| 43 | 1 | 0 | -4.662192 | 4.266569  | -6.010553 |
| 44 | 1 | 0 | -5.953386 | 4.189677  | -4.789078 |
| 45 | 6 | 0 | -3.034289 | 4.111729  | -3.665303 |
| 46 | 1 | 0 | -3.470582 | 0.511149  | -2.255379 |
| 47 | 6 | 0 | -2.342050 | 2.310536  | -2.214740 |
| 48 | 6 | 0 | -6.255342 | -6.011694 | -3.682448 |
| 49 | 9 | 0 | -8.242825 | -5.747172 | -2.452360 |
| 50 | 9 | 0 | -4.270973 | -6.247715 | -4.927303 |
| 51 | 1 | 0 | -2.892212 | 5.110257  | -4.066291 |
| 52 | 6 | 0 | -2.166049 | 3.601530  | -2.700209 |
| 53 | 1 | 0 | -1.655275 | 1.908576  | -1.478114 |
| 54 | 9 | 0 | -6.183506 | -7.279738 | -3.312631 |
| 55 | 1 | 0 | -1.342816 | 4.208084  | -2.338484 |
| 56 | 6 | 0 | -7.826406 | 0.861793  | -0.055938 |
| 57 | 1 | 0 | -7.719621 | 1.678344  | 0.667687  |
| 58 | 1 | 0 | -8.878573 | 0.582177  | -0.044742 |
| 59 | 6 | 0 | -7.452042 | 1.347531  | -1.449713 |
| 60 | 1 | 0 | -7.656037 | 0.564061  | -2.187577 |
| 61 | 1 | 0 | -8.031461 | 2.235426  | -1.715792 |
| 62 | 1 | 0 | -6.389776 | 1.618501  | -1.498385 |
| 63 | 6 | 0 | -5.753880 | 0.232476  | 1.007409  |
| 64 | 1 | 0 | -5.505609 | 1.106828  | 0.393739  |
| 65 | 6 | 0 | -4.537119 | -0.695026 | 0.914422  |
| 66 | 1 | 0 | -4.511668 | -1.248187 | -0.028029 |
| 67 | 1 | 0 | -3.629122 | -0.087881 | 0.972843  |
| 68 | 1 | 0 | -4.493221 | -1.423298 | 1.725114  |
| 69 | 6 | 0 | -5.956267 | 0.731162  | 2.441074  |
| 70 | 1 | 0 | -5.048509 | 1.242581  | 2.771998  |
| 71 | 1 | 0 | -6.784544 | 1.439275  | 2.523011  |
| 72 | 1 | 0 | -6.143137 | -0.091607 | 3.135329  |
| 73 | 6 | 0 | -7.803845 | -1.276121 | 1.157726  |
| 74 | 1 | 0 | -8.296199 | -0.737604 | 1.982467  |
| 75 | 6 | 0 | -8.874925 | -1.926364 | 0.272119  |
| 76 | 1 | 0 | -9.507127 | -2.564986 | 0.893782  |
| 77 | 1 | 0 | -9.529322 | -1.212303 | -0.230089 |
| 78 | 1 | 0 | -8.405611 | -2.551013 | -0.494105 |
| 79 | 6 | 0 | -6.951617 | -2.402982 | 1.737643  |
| 80 | 1 | 0 | -6.350714 | -2.865304 | 0.947632  |
| 81 | 1 | 0 | -6.288074 | -2.080334 | 2.538903  |
| 82 | 1 | 0 | -7.614284 | -3.168338 | 2.148578  |
| 83 | 7 | 0 | -6.997963 | -0.300644 | 0.361155  |
| 84 | 1 | 0 | -6.658951 | -1.134339 | -0.947996 |

---

## INT4

| Center<br>Number | Atomic<br>Number | Atomic<br>Type | Coordinates (Angstroms) |           |           |
|------------------|------------------|----------------|-------------------------|-----------|-----------|
|                  |                  |                | X                       | Y         | Z         |
| 1                | 6                | 0              | -2.943359               | -2.254758 | -2.762148 |
| 2                | 6                | 0              | -2.197810               | -3.303695 | -2.170388 |
| 3                | 6                | 0              | -2.840077               | -4.159197 | -1.258776 |
| 4                | 6                | 0              | -4.183296               | -3.952769 | -0.981150 |
| 5                | 6                | 0              | -4.910339               | -2.924732 | -1.609037 |
| 6                | 6                | 0              | -4.314761               | -2.063426 | -2.528300 |
| 7                | 1                | 0              | -2.294149               | -4.968874 | -0.784435 |
| 8                | 1                | 0              | -4.694366               | -4.606174 | -0.281080 |
| 9                | 1                | 0              | -5.971827               | -2.814402 | -1.407496 |
| 10               | 6                | 0              | -0.868425               | -3.215652 | -2.708463 |
| 11               | 1                | 0              | -0.029858               | -3.856323 | -2.479435 |
| 12               | 6                | 0              | -0.858245               | -2.153679 | -3.570859 |
| 13               | 1                | 0              | -0.056944               | -1.759502 | -4.178301 |
| 14               | 7                | 0              | -2.100686               | -1.563049 | -3.595697 |
| 15               | 1                | 0              | -2.380142               | -0.800809 | -4.195803 |
| 16               | 6                | 0              | -5.096623               | -1.032084 | -3.233769 |
| 17               | 1                | 0              | -5.546922               | -0.136092 | -1.553687 |
| 18               | 8                | 0              | -5.933675               | -0.248603 | -2.475447 |
| 19               | 6                | 0              | -5.136914               | -0.922856 | -4.582206 |
| 20               | 7                | 0              | -5.858628               | 0.009477  | -5.360841 |
| 21               | 7                | 0              | -4.572271               | -1.772885 | -5.582720 |
| 22               | 6                | 0              | -6.019924               | -0.569530 | -6.608185 |
| 23               | 6                | 0              | -6.783928               | 1.040202  | -4.928545 |
| 24               | 7                | 0              | -5.295451               | -1.609907 | -6.794985 |
| 25               | 6                | 0              | -4.208478               | -3.111496 | -5.315686 |
| 26               | 6                | 0              | -6.980318               | -0.013479 | -7.633787 |
| 27               | 6                | 0              | -7.373213               | 1.695522  | -6.184473 |
| 28               | 1                | 0              | -7.597291               | 0.581570  | -4.348359 |
| 29               | 6                | 0              | -6.314231               | 2.290083  | -4.221209 |
| 30               | 6                | 0              | -5.050390               | -3.996595 | -4.645435 |
| 31               | 6                | 0              | -2.932106               | -3.551416 | -5.658423 |
| 32               | 1                | 0              | -7.448553               | -0.844770 | -8.161223 |
| 33               | 1                | 0              | -6.429193               | 0.602495  | -8.358196 |
| 34               | 8                | 0              | -8.001451               | 0.755963  | -7.018963 |
| 35               | 1                | 0              | -6.533509               | 2.153983  | -6.733681 |
| 36               | 6                | 0              | -8.208386               | 2.831031  | -5.599124 |
| 37               | 6                | 0              | -7.212903               | 3.317371  | -4.557966 |
| 38               | 6                | 0              | -5.219725               | 2.536538  | -3.409809 |
| 39               | 6                | 0              | -4.604111               | -5.246057 | -4.242426 |
| 40               | 9                | 0              | -6.285234               | -3.621788 | -4.320329 |
| 41               | 6                | 0              | -2.477929               | -4.805006 | -5.279539 |
| 42               | 9                | 0              | -2.096881               | -2.740244 | -6.302545 |
| 43               | 1                | 0              | -8.479823               | 3.595370  | -6.329300 |
| 44               | 1                | 0              | -9.124529               | 2.433959  | -5.144750 |
| 45               | 6                | 0              | -7.051248               | 4.589573  | -4.028255 |
| 46               | 1                | 0              | -4.514851               | 1.742991  | -3.184275 |
| 47               | 6                | 0              | -5.051169               | 3.824072  | -2.891535 |
| 48               | 6                | 0              | -3.316315               | -5.649614 | -4.564921 |
| 49               | 9                | 0              | -5.403946               | -6.059178 | -3.555642 |
| 50               | 9                | 0              | -1.241101               | -5.195698 | -5.580561 |
| 51               | 1                | 0              | -7.739323               | 5.388909  | -4.287188 |
| 52               | 6                | 0              | -5.966961               | 4.833931  | -3.181563 |
| 53               | 1                | 0              | -4.195465               | 4.043773  | -2.259279 |
| 54               | 9                | 0              | -2.881161               | -6.845604 | -4.180675 |
| 55               | 1                | 0              | -5.822532               | 5.825944  | -2.765673 |
| 56               | 6                | 0              | -5.878094               | -0.742054 | 0.980611  |

|    |   |   |           |           |           |
|----|---|---|-----------|-----------|-----------|
| 57 | 1 | 0 | -5.277005 | -1.645329 | 0.840979  |
| 58 | 6 | 0 | -7.285143 | -1.081454 | 0.480543  |
| 59 | 1 | 0 | -7.316228 | -1.117929 | -0.611756 |
| 60 | 1 | 0 | -7.580815 | -2.058914 | 0.872344  |
| 61 | 1 | 0 | -8.031567 | -0.358683 | 0.823549  |
| 62 | 6 | 0 | -5.970808 | 1.564885  | 0.055378  |
| 63 | 1 | 0 | -7.032545 | 1.329708  | 0.152341  |
| 64 | 6 | 0 | -5.607752 | 2.665742  | 1.055274  |
| 65 | 1 | 0 | -6.326933 | 3.482421  | 0.948085  |
| 66 | 1 | 0 | -5.638677 | 2.321016  | 2.091442  |
| 67 | 1 | 0 | -4.613396 | 3.080218  | 0.866415  |
| 68 | 6 | 0 | -3.783019 | 0.483020  | 0.399394  |
| 69 | 1 | 0 | -3.660423 | 1.118829  | 1.290281  |
| 70 | 6 | 0 | -3.025419 | -0.816872 | 0.665398  |
| 71 | 1 | 0 | -1.959349 | -0.584919 | 0.739039  |
| 72 | 1 | 0 | -3.322112 | -1.295397 | 1.601616  |
| 73 | 1 | 0 | -3.163636 | -1.529209 | -0.151729 |
| 74 | 6 | 0 | -3.141786 | 1.197623  | -0.789955 |
| 75 | 1 | 0 | -3.181397 | 0.551342  | -1.676114 |
| 76 | 1 | 0 | -3.641904 | 2.140926  | -1.022851 |
| 77 | 1 | 0 | -2.092717 | 1.417619  | -0.575478 |
| 78 | 7 | 0 | -5.228146 | 0.282674  | 0.127346  |
| 79 | 6 | 0 | -5.914067 | -0.407621 | 2.474917  |
| 80 | 1 | 0 | -4.928940 | -0.126947 | 2.860351  |
| 81 | 1 | 0 | -6.608835 | 0.414770  | 2.673098  |
| 82 | 1 | 0 | -6.262420 | -1.277290 | 3.040255  |
| 83 | 1 | 0 | -5.852351 | 1.967333  | -0.956586 |

-----

### INT5

-----

| Center<br>Number | Atomic<br>Number | Atomic<br>Type | Coordinates (Angstroms) |           |           |
|------------------|------------------|----------------|-------------------------|-----------|-----------|
|                  |                  |                | X                       | Y         | Z         |
| 1                | 6                | 0              | -17.467992              | -4.117377 | 29.733206 |
| 2                | 6                | 0              | -17.585632              | -5.214723 | 30.626025 |
| 3                | 6                | 0              | -18.326293              | -5.064978 | 31.804531 |
| 4                | 6                | 0              | -18.944931              | -3.849725 | 32.080555 |
| 5                | 6                | 0              | -18.793565              | -2.762669 | 31.217549 |
| 6                | 6                | 0              | -18.030499              | -2.863167 | 30.047936 |
| 7                | 1                | 0              | -18.409903              | -5.893133 | 32.501533 |
| 8                | 1                | 0              | -19.517933              | -3.729628 | 32.992547 |
| 9                | 1                | 0              | -19.209919              | -1.793661 | 31.472624 |
| 10               | 6                | 0              | -16.836953              | -6.300648 | 30.056106 |
| 11               | 1                | 0              | -16.710867              | -7.288265 | 30.473002 |
| 12               | 6                | 0              | -16.325442              | -5.850118 | 28.876964 |
| 13               | 1                | 0              | -15.719694              | -6.353120 | 28.138411 |
| 14               | 7                | 0              | -16.695969              | -4.529721 | 28.680081 |
| 15               | 1                | 0              | -16.550234              | -4.038219 | 27.810548 |
| 16               | 6                | 0              | -17.679567              | -1.611896 | 29.378286 |
| 17               | 8                | 0              | -18.305666              | -0.576868 | 29.405560 |
| 18               | 6                | 0              | -16.293676              | -1.507396 | 28.742949 |
| 19               | 7                | 0              | -15.938666              | -0.834402 | 27.641841 |
| 20               | 7                | 0              | -15.146932              | -1.819762 | 29.360969 |
| 21               | 6                | 0              | -14.560728              | -0.753621 | 27.651228 |
| 22               | 6                | 0              | -16.619787              | -0.330752 | 26.415922 |
| 23               | 7                | 0              | -14.063805              | -1.353979 | 28.694473 |
| 24               | 6                | 0              | -14.985993              | -2.587912 | 30.545550 |
| 25               | 6                | 0              | -13.761869              | 0.053851  | 26.652030 |
| 26               | 6                | 0              | -15.834209              | 0.940678  | 26.051074 |
| 27               | 1                | 0              | -16.407644              | -1.095962 | 25.659948 |
| 28               | 6                | 0              | -18.062427              | 0.099062  | 26.309575 |

|    |   |   |            |           |           |
|----|---|---|------------|-----------|-----------|
| 29 | 6 | 0 | -14.325276 | -3.810844 | 30.469553 |
| 30 | 6 | 0 | -15.588478 | -2.191398 | 31.733673 |
| 31 | 1 | 0 | -12.986460 | -0.576229 | 26.213291 |
| 32 | 1 | 0 | -13.279792 | 0.859987  | 27.220797 |
| 33 | 8 | 0 | -14.548734 | 0.577514  | 25.604128 |
| 34 | 1 | 0 | -15.768028 | 1.569514  | 26.952911 |
| 35 | 6 | 0 | -16.706468 | 1.633909  | 25.017569 |
| 36 | 6 | 0 | -18.090781 | 1.231306  | 25.480006 |
| 37 | 6 | 0 | -19.244599 | -0.534328 | 26.680151 |
| 38 | 6 | 0 | -14.292171 | -4.648775 | 31.572815 |
| 39 | 9 | 0 | -13.779333 | -4.199262 | 29.327226 |
| 40 | 6 | 0 | -15.575010 | -3.033957 | 32.833841 |
| 41 | 9 | 0 | -16.241990 | -1.036928 | 31.790348 |
| 42 | 1 | 0 | -16.545281 | 2.712114  | 24.982402 |
| 43 | 1 | 0 | -16.500486 | 1.219252  | 24.023597 |
| 44 | 6 | 0 | -19.303346 | 1.795457  | 25.104160 |
| 45 | 1 | 0 | -19.245450 | -1.460521 | 27.242208 |
| 46 | 6 | 0 | -20.457522 | 0.037737  | 26.303270 |
| 47 | 6 | 0 | -14.922162 | -4.258377 | 32.749281 |
| 48 | 9 | 0 | -13.691133 | -5.826652 | 31.502280 |
| 49 | 9 | 0 | -16.183652 | -2.680948 | 33.955680 |
| 50 | 1 | 0 | -19.323201 | 2.678970  | 24.473980 |
| 51 | 6 | 0 | -20.487471 | 1.203154  | 25.537121 |
| 52 | 1 | 0 | -21.386002 | -0.435193 | 26.604141 |
| 53 | 9 | 0 | -14.916372 | -5.068019 | 33.793914 |
| 54 | 1 | 0 | -21.441263 | 1.637721  | 25.256631 |

## INT6

| Center<br>Number | Atomic<br>Number | Atomic<br>Type | Coordinates (Angstroms) |           |           |
|------------------|------------------|----------------|-------------------------|-----------|-----------|
|                  |                  |                | X                       | Y         | Z         |
| 1                | 6                | 0              | -17.149948              | -2.713893 | 27.592650 |
| 2                | 6                | 0              | -15.949130              | -3.516153 | 27.566887 |
| 3                | 6                | 0              | -14.853159              | -3.075744 | 26.828493 |
| 4                | 6                | 0              | -14.920376              | -1.870819 | 26.110847 |
| 5                | 6                | 0              | -16.084033              | -1.106769 | 26.099015 |
| 6                | 6                | 0              | -17.216473              | -1.528918 | 26.816131 |
| 7                | 1                | 0              | -13.942170              | -3.668453 | 26.790172 |
| 8                | 1                | 0              | -14.062686              | -1.547240 | 25.530773 |
| 9                | 1                | 0              | -16.156295              | -0.210974 | 25.489601 |
| 10               | 6                | 0              | -16.265907              | -4.652175 | 28.371747 |
| 11               | 1                | 0              | -15.625032              | -5.487431 | 28.617223 |
| 12               | 6                | 0              | -17.564100              | -4.437742 | 28.798818 |
| 13               | 1                | 0              | -18.150499              | -5.094794 | 29.433082 |
| 14               | 7                | 0              | -18.119618              | -3.264420 | 28.345376 |
| 15               | 6                | 0              | -18.487143              | -0.891423 | 26.589192 |
| 16               | 8                | 0              | -18.728745              | 0.210786  | 26.127895 |
| 17               | 6                | 0              | -19.723252              | -1.773522 | 26.789917 |
| 18               | 7                | 0              | -20.853039              | -1.497248 | 27.443358 |
| 19               | 7                | 0              | -19.993529              | -2.842366 | 26.031480 |
| 20               | 6                | 0              | -21.775260              | -2.461938 | 27.070984 |
| 21               | 6                | 0              | -21.189678              | -0.661176 | 28.618666 |
| 22               | 7                | 0              | -21.266005              | -3.291659 | 26.213683 |
| 23               | 6                | 0              | -19.023812              | -3.639064 | 25.371365 |
| 24               | 6                | 0              | -23.214276              | -2.442229 | 27.532042 |
| 25               | 6                | 0              | -22.695758              | -0.393640 | 28.486837 |
| 26               | 1                | 0              | -21.018443              | -1.318592 | 29.480761 |
| 27               | 6                | 0              | -20.629522              | 0.710585  | 28.915960 |
| 28               | 6                | 0              | -18.760915              | -4.915981 | 25.863523 |
| 29               | 6                | 0              | -18.200868              | -3.091212 | 24.395480 |

|    |   |   |            |           |           |
|----|---|---|------------|-----------|-----------|
| 30 | 1 | 0 | -23.517228 | -3.451456 | 27.813091 |
| 31 | 1 | 0 | -23.825023 | -2.112821 | 26.680242 |
| 32 | 8 | 0 | -23.413655 | -1.595018 | 28.644714 |
| 33 | 1 | 0 | -22.874142 | 0.027086  | 27.484168 |
| 34 | 6 | 0 | -22.969845 | 0.678575  | 29.528220 |
| 35 | 6 | 0 | -21.677426 | 1.465794  | 29.469151 |
| 36 | 6 | 0 | -19.328959 | 1.203558  | 28.917311 |
| 37 | 6 | 0 | -17.666615 | -5.626054 | 25.398250 |
| 38 | 9 | 0 | -19.534851 | -5.449389 | 26.795105 |
| 39 | 6 | 0 | -17.095188 | -3.791068 | 23.938994 |
| 40 | 9 | 0 | -18.428570 | -1.860317 | 23.947592 |
| 41 | 1 | 0 | -23.860677 | 1.268733  | 29.308085 |
| 42 | 1 | 0 | -23.094132 | 0.213541  | 30.513713 |
| 43 | 6 | 0 | -21.444866 | 2.748945  | 29.945783 |
| 44 | 1 | 0 | -18.490978 | 0.608589  | 28.577345 |
| 45 | 6 | 0 | -19.103401 | 2.495415  | 29.390950 |
| 46 | 6 | 0 | -16.832035 | -5.057369 | 24.443497 |
| 47 | 9 | 0 | -17.405305 | -6.839566 | 25.867666 |
| 48 | 9 | 0 | -16.291969 | -3.252894 | 23.029026 |
| 49 | 1 | 0 | -22.258297 | 3.333867  | 30.363999 |
| 50 | 6 | 0 | -20.152407 | 3.267387  | 29.887773 |
| 51 | 1 | 0 | -18.095754 | 2.896730  | 29.379614 |
| 52 | 9 | 0 | -15.776408 | -5.730614 | 24.010012 |
| 53 | 1 | 0 | -19.957640 | 4.271517  | 30.250135 |

-----  
**Re-INT7**

| Center<br>Number | Atomic<br>Number | Atomic<br>Type | Coordinates (Angstroms) |           |           |
|------------------|------------------|----------------|-------------------------|-----------|-----------|
|                  |                  |                | X                       | Y         | Z         |
| 1                | 6                | 0              | -18.796779              | -1.374764 | 26.143252 |
| 2                | 6                | 0              | -17.977209              | -1.994049 | 27.104932 |
| 3                | 6                | 0              | -16.587516              | -1.812547 | 26.978805 |
| 4                | 6                | 0              | -16.110657              | -1.011452 | 25.950625 |
| 5                | 6                | 0              | -16.973381              | -0.394335 | 25.017598 |
| 6                | 6                | 0              | -18.340877              | -0.593191 | 25.085647 |
| 7                | 1                | 0              | -15.898479              | -2.282009 | 27.673791 |
| 8                | 1                | 0              | -15.041037              | -0.858108 | 25.850994 |
| 9                | 1                | 0              | -16.557030              | 0.215026  | 24.219607 |
| 10               | 6                | 0              | -18.874630              | -2.684501 | 27.994925 |
| 11               | 1                | 0              | -18.609698              | -3.289902 | 28.849147 |
| 12               | 6                | 0              | -20.151506              | -2.435642 | 27.562236 |
| 13               | 1                | 0              | -21.097136              | -2.762041 | 27.969069 |
| 14               | 7                | 0              | -20.106246              | -1.657225 | 26.420053 |
| 15               | 6                | 0              | -19.355282              | 0.008028  | 24.103142 |
| 16               | 8                | 0              | -19.411465              | 1.272252  | 24.058266 |
| 17               | 6                | 0              | -19.086421              | -0.629084 | 22.674340 |
| 18               | 7                | 0              | -19.019878              | 0.038417  | 21.508635 |
| 19               | 7                | 0              | -18.641006              | -1.856990 | 22.385523 |
| 20               | 6                | 0              | -18.476373              | -0.817747 | 20.580942 |
| 21               | 6                | 0              | -19.406506              | 1.445384  | 21.202657 |
| 22               | 7                | 0              | -18.240252              | -1.989414 | 21.090852 |
| 23               | 6                | 0              | -18.540623              | -2.940884 | 23.290946 |
| 24               | 6                | 0              | -18.119572              | -0.347784 | 19.206867 |
| 25               | 6                | 0              | -18.998801              | 1.782927  | 19.730747 |
| 26               | 1                | 0              | -18.889742              | 2.050506  | 21.945315 |
| 27               | 6                | 0              | -20.903494              | 1.674114  | 21.193262 |
| 28               | 6                | 0              | -19.692910              | -3.590310 | 23.715986 |
| 29               | 6                | 0              | -17.299441              | -3.296256 | 23.809596 |
| 30               | 1                | 0              | -18.896780              | -0.629841 | 18.487523 |
| 31               | 1                | 0              | -17.186588              | -0.824384 | 18.903771 |

|    |   |   |            |           |           |
|----|---|---|------------|-----------|-----------|
| 32 | 8 | 0 | -17.895104 | 1.042519  | 19.248467 |
| 33 | 1 | 0 | -18.657911 | 2.819760  | 19.741161 |
| 34 | 6 | 0 | -20.278438 | 1.684581  | 18.874277 |
| 35 | 6 | 0 | -21.380010 | 1.822190  | 19.889132 |
| 36 | 6 | 0 | -21.756216 | 1.798151  | 22.287216 |
| 37 | 6 | 0 | -19.615819 | -4.538294 | 24.727173 |
| 38 | 9 | 0 | -20.854196 | -3.308984 | 23.149393 |
| 39 | 6 | 0 | -17.217274 | -4.241563 | 24.816778 |
| 40 | 9 | 0 | -16.203040 | -2.699446 | 23.364523 |
| 41 | 1 | 0 | -20.301388 | 2.464330  | 18.109540 |
| 42 | 1 | 0 | -20.350497 | 0.726086  | 18.350425 |
| 43 | 6 | 0 | -22.728832 | 2.077501  | 19.658574 |
| 44 | 1 | 0 | -21.344457 | 1.705998  | 23.286060 |
| 45 | 6 | 0 | -23.105642 | 2.050175  | 22.051081 |
| 46 | 6 | 0 | -18.380774 | -4.843051 | 25.285157 |
| 47 | 9 | 0 | -20.704171 | -5.165708 | 25.155283 |
| 48 | 9 | 0 | -16.046150 | -4.556378 | 25.357570 |
| 49 | 1 | 0 | -23.101326 | 2.197953  | 18.645769 |
| 50 | 6 | 0 | -23.590133 | 2.184193  | 20.747782 |
| 51 | 1 | 0 | -23.788588 | 2.158921  | 22.888830 |
| 52 | 9 | 0 | -18.305202 | -5.736486 | 26.260638 |
| 53 | 1 | 0 | -24.643951 | 2.384934  | 20.581913 |
| 54 | 6 | 0 | -21.105674 | -0.870299 | 25.703917 |
| 55 | 8 | 0 | -20.697263 | -0.740572 | 24.378650 |
| 56 | 6 | 0 | -22.403886 | -1.705231 | 25.669752 |
| 57 | 9 | 0 | -23.277497 | -1.219355 | 24.788089 |
| 58 | 9 | 0 | -22.164187 | -2.979597 | 25.349570 |
| 59 | 9 | 0 | -22.990188 | -1.706637 | 26.878055 |
| 60 | 6 | 0 | -21.370074 | 0.474748  | 26.387126 |
| 61 | 6 | 0 | -20.735433 | 0.827299  | 27.574808 |
| 62 | 6 | 0 | -22.271306 | 1.364017  | 25.796157 |
| 63 | 6 | 0 | -20.993961 | 2.064362  | 28.164228 |
| 64 | 1 | 0 | -20.033075 | 0.144638  | 28.043605 |
| 65 | 6 | 0 | -22.531116 | 2.594355  | 26.386876 |
| 66 | 1 | 0 | -22.764538 | 1.086291  | 24.871024 |
| 67 | 6 | 0 | -21.889825 | 2.949065  | 27.573738 |
| 68 | 1 | 0 | -20.489037 | 2.333642  | 29.086158 |
| 69 | 1 | 0 | -23.231719 | 3.278688  | 25.918741 |
| 70 | 1 | 0 | -22.088010 | 3.911703  | 28.033859 |

-----  
**Si-INT7**  
 -----

| Center<br>Number | Atomic<br>Number | Atomic<br>Type | Coordinates (Angstroms) |           |           |
|------------------|------------------|----------------|-------------------------|-----------|-----------|
|                  |                  |                | X                       | Y         | Z         |
| 1                | 6                | 0              | -18.983238              | -1.508504 | 25.723074 |
| 2                | 6                | 0              | -18.357764              | -2.635314 | 26.286751 |
| 3                | 6                | 0              | -16.976381              | -2.791521 | 26.069944 |
| 4                | 6                | 0              | -16.301857              | -1.828062 | 25.332938 |
| 5                | 6                | 0              | -16.967988              | -0.713574 | 24.779391 |
| 6                | 6                | 0              | -18.331871              | -0.553843 | 24.948496 |
| 7                | 1                | 0              | -16.446359              | -3.651610 | 26.467637 |
| 8                | 1                | 0              | -15.235442              | -1.937703 | 25.164697 |
| 9                | 1                | 0              | -16.416733              | 0.013169  | 24.189611 |
| 10               | 6                | 0              | -19.401936              | -3.369923 | 26.952509 |
| 11               | 1                | 0              | -19.307282              | -4.310054 | 27.475940 |
| 12               | 6                | 0              | -20.564151              | -2.665892 | 26.789383 |
| 13               | 1                | 0              | -21.559904              | -2.902986 | 27.129478 |
| 14               | 7                | 0              | -20.325086              | -1.534660 | 26.025802 |
| 15               | 6                | 0              | -19.127069              | 0.577069  | 24.304590 |
| 16               | 8                | 0              | -18.721598              | 1.760569  | 24.489592 |

|    |   |   |            |           |           |
|----|---|---|------------|-----------|-----------|
| 17 | 6 | 0 | -19.294284 | 0.281024  | 22.763283 |
| 18 | 7 | 0 | -19.410867 | 1.220646  | 21.810098 |
| 19 | 7 | 0 | -19.153337 | -0.868658 | 22.096089 |
| 20 | 6 | 0 | -19.267508 | 0.588317  | 20.597004 |
| 21 | 6 | 0 | -19.692032 | 2.681151  | 21.957971 |
| 22 | 7 | 0 | -19.121467 | -0.694779 | 20.741816 |
| 23 | 6 | 0 | -19.155530 | -2.177251 | 22.641753 |
| 24 | 6 | 0 | -19.218176 | 1.351343  | 19.307899 |
| 25 | 6 | 0 | -19.874379 | 3.265922  | 20.530277 |
| 26 | 1 | 0 | -18.850634 | 3.097402  | 22.507746 |
| 27 | 6 | 0 | -21.044106 | 2.959770  | 22.584202 |
| 28 | 6 | 0 | -20.337423 | -2.703528 | 23.152144 |
| 29 | 6 | 0 | -17.982546 | -2.920723 | 22.702169 |
| 30 | 1 | 0 | -20.134240 | 1.181112  | 18.730512 |
| 31 | 1 | 0 | -18.373462 | 0.990204  | 18.718889 |
| 32 | 8 | 0 | -18.994944 | 2.715763  | 19.571243 |
| 33 | 1 | 0 | -19.606311 | 4.322726  | 20.593977 |
| 34 | 6 | 0 | -21.380917 | 3.152460  | 20.216474 |
| 35 | 6 | 0 | -21.993918 | 3.217141  | 21.590055 |
| 36 | 6 | 0 | -21.384847 | 3.025536  | 23.932599 |
| 37 | 6 | 0 | -20.343343 | -3.952342 | 23.753124 |
| 38 | 9 | 0 | -21.458799 | -1.999191 | 23.094219 |
| 39 | 6 | 0 | -17.983814 | -4.172113 | 23.296141 |
| 40 | 9 | 0 | -16.852601 | -2.413763 | 22.231316 |
| 41 | 1 | 0 | -21.715203 | 3.952117  | 19.551913 |
| 42 | 1 | 0 | -21.631363 | 2.202064  | 19.731712 |
| 43 | 6 | 0 | -23.311497 | 3.504108  | 21.930592 |
| 44 | 1 | 0 | -20.633679 | 2.831965  | 24.687014 |
| 45 | 6 | 0 | -22.707572 | 3.306644  | 24.269305 |
| 46 | 6 | 0 | -19.164036 | -4.681101 | 23.825249 |
| 47 | 9 | 0 | -21.461126 | -4.438939 | 24.279670 |
| 48 | 9 | 0 | -16.855826 | -4.864282 | 23.405364 |
| 49 | 1 | 0 | -24.049263 | 3.705532  | 21.159670 |
| 50 | 6 | 0 | -23.663975 | 3.536529  | 23.278859 |
| 51 | 1 | 0 | -22.994068 | 3.340607  | 25.315232 |
| 52 | 9 | 0 | -19.156137 | -5.859985 | 24.429771 |
| 53 | 1 | 0 | -24.689754 | 3.754026  | 23.560583 |
| 54 | 6 | 0 | -23.366753 | -1.065062 | 26.712421 |
| 55 | 6 | 0 | -22.598954 | -0.536016 | 25.669430 |
| 56 | 6 | 0 | -23.232562 | -0.157032 | 24.484450 |
| 57 | 6 | 0 | -24.605198 | -0.330689 | 24.334516 |
| 58 | 6 | 0 | -25.361974 | -0.882968 | 25.364070 |
| 59 | 6 | 0 | -24.738454 | -1.246225 | 26.554127 |
| 60 | 1 | 0 | -22.913481 | -1.317987 | 27.663225 |
| 61 | 1 | 0 | -22.642757 | 0.283744  | 23.689879 |
| 62 | 1 | 0 | -25.083208 | -0.025280 | 23.408967 |
| 63 | 1 | 0 | -26.431972 | -1.019776 | 25.244542 |
| 64 | 1 | 0 | -25.318484 | -1.663313 | 27.370824 |
| 65 | 6 | 0 | -21.089879 | -0.301433 | 25.802933 |
| 66 | 8 | 0 | -20.635693 | 0.306690  | 24.648879 |
| 67 | 6 | 0 | -20.828639 | 0.640188  | 27.007979 |
| 68 | 9 | 0 | -19.543106 | 0.980549  | 27.114663 |
| 69 | 9 | 0 | -21.540723 | 1.766827  | 26.887279 |
| 70 | 9 | 0 | -21.172831 | 0.059239  | 28.170788 |

-----  
**R-P**  
 -----

| Center<br>Number | Atomic<br>Number | Atomic<br>Type | Coordinates (Angstroms) |           |           |
|------------------|------------------|----------------|-------------------------|-----------|-----------|
|                  |                  |                | X                       | Y         | Z         |
| 1                | 6                | 0              | -19.347357              | -1.357869 | 25.748269 |

|    |   |   |            |           |           |
|----|---|---|------------|-----------|-----------|
| 2  | 6 | 0 | -18.566494 | -2.293056 | 26.442050 |
| 3  | 6 | 0 | -17.175862 | -2.190471 | 26.276555 |
| 4  | 6 | 0 | -16.655952 | -1.189565 | 25.457130 |
| 5  | 6 | 0 | -17.478322 | -0.278262 | 24.771796 |
| 6  | 6 | 0 | -18.856651 | -0.362318 | 24.915707 |
| 7  | 1 | 0 | -16.505336 | -2.879609 | 26.780164 |
| 8  | 1 | 0 | -15.580950 | -1.115193 | 25.336040 |
| 9  | 1 | 0 | -17.050776 | 0.479466  | 24.124101 |
| 10 | 6 | 0 | -19.506527 | -3.124188 | 27.156835 |
| 11 | 1 | 0 | -19.278987 | -3.964889 | 27.794705 |
| 12 | 6 | 0 | -20.761376 | -2.664736 | 26.870894 |
| 13 | 1 | 0 | -21.729121 | -3.010692 | 27.204342 |
| 14 | 7 | 0 | -20.666770 | -1.589424 | 25.994635 |
| 15 | 6 | 0 | -19.856833 | 0.446904  | 24.207770 |
| 16 | 8 | 0 | -19.642306 | 1.319969  | 23.413373 |
| 17 | 6 | 0 | -24.129444 | -1.234325 | 25.896682 |
| 18 | 6 | 0 | -22.947775 | -1.327289 | 25.163499 |
| 19 | 6 | 0 | -22.895491 | -2.128618 | 24.019802 |
| 20 | 6 | 0 | -24.022732 | -2.824453 | 23.604480 |
| 21 | 6 | 0 | -25.207705 | -2.729175 | 24.334246 |
| 22 | 6 | 0 | -25.257457 | -1.938047 | 25.476375 |
| 23 | 1 | 0 | -24.190775 | -0.622547 | 26.788428 |
| 24 | 1 | 0 | -21.968337 | -2.195660 | 23.458531 |
| 25 | 1 | 0 | -23.978742 | -3.440606 | 22.712885 |
| 26 | 1 | 0 | -26.089455 | -3.273001 | 24.011704 |
| 27 | 1 | 0 | -26.176415 | -1.862161 | 26.047535 |
| 28 | 6 | 0 | -21.658204 | -0.629787 | 25.556359 |
| 29 | 8 | 0 | -21.182491 | 0.084519  | 24.419676 |
| 30 | 6 | 0 | -21.834133 | 0.429662  | 26.665094 |
| 31 | 9 | 0 | -20.683950 | 1.087886  | 26.851785 |
| 32 | 9 | 0 | -22.771232 | 1.320289  | 26.346517 |
| 33 | 9 | 0 | -22.169147 | -0.145397 | 27.825489 |

S-P

| Center<br>Number | Atomic<br>Number | Atomic<br>Type | Coordinates (Angstroms) |           |           |
|------------------|------------------|----------------|-------------------------|-----------|-----------|
|                  |                  |                | X                       | Y         | Z         |
| 1                | 6                | 0              | -19.545198              | -1.599880 | 25.824093 |
| 2                | 6                | 0              | -18.798428              | -2.295190 | 26.785276 |
| 3                | 6                | 0              | -17.409001              | -2.098233 | 26.762818 |
| 4                | 6                | 0              | -16.855758              | -1.236986 | 25.815711 |
| 5                | 6                | 0              | -17.640584              | -0.566499 | 24.862531 |
| 6                | 6                | 0              | -19.018287              | -0.747297 | 24.861148 |
| 7                | 1                | 0              | -16.765162              | -2.604726 | 27.474789 |
| 8                | 1                | 0              | -15.781959              | -1.087072 | 25.805901 |
| 9                | 1                | 0              | -17.183117              | 0.078340  | 24.119839 |
| 10               | 6                | 0              | -19.766536              | -3.037617 | 27.557148 |
| 11               | 1                | 0              | -19.569091              | -3.711080 | 28.377550 |
| 12               | 6                | 0              | -21.004231              | -2.750295 | 27.053739 |
| 13               | 1                | 0              | -21.977504              | -3.100085 | 27.362166 |
| 14               | 7                | 0              | -20.871147              | -1.882945 | 25.969811 |
| 15               | 6                | 0              | -19.957908              | -0.232563 | 23.854343 |
| 16               | 8                | 0              | -19.690402              | 0.425537  | 22.887119 |
| 17               | 6                | 0              | -21.781777              | -0.974353 | 25.300267 |
| 18               | 8                | 0              | -21.267167              | -0.664192 | 24.011543 |
| 19               | 6                | 0              | -23.097407              | -1.712927 | 25.002145 |
| 20               | 9                | 0              | -23.918580              | -0.952657 | 24.282400 |
| 21               | 9                | 0              | -22.874403              | -2.843229 | 24.336136 |
| 22               | 9                | 0              | -23.709975              | -2.019786 | 26.153732 |
| 23               | 6                | 0              | -22.037595              | 0.308746  | 26.083810 |



|    |   |   |            |           |           |
|----|---|---|------------|-----------|-----------|
| 24 | 6 | 0 | -21.802370 | 0.379759  | 27.455968 |
| 25 | 6 | 0 | -22.528041 | 1.423612  | 25.399066 |
| 26 | 6 | 0 | -22.060171 | 1.564144  | 28.141639 |
| 27 | 1 | 0 | -21.406097 | -0.477318 | 27.991595 |
| 28 | 6 | 0 | -22.783571 | 2.603294  | 26.089403 |
| 29 | 1 | 0 | -22.695749 | 1.366431  | 24.328847 |
| 30 | 6 | 0 | -22.552275 | 2.674522  | 27.461739 |
| 31 | 1 | 0 | -21.869738 | 1.617587  | 29.208195 |
| 32 | 1 | 0 | -23.159104 | 3.468614  | 25.553600 |
| 33 | 1 | 0 | -22.750270 | 3.596481  | 27.998455 |

-----  
**Si-TS1'**  
 -----

| Center<br>Number | Atomic<br>Number | Atomic<br>Type | Coordinates (Angstroms) |           |           |
|------------------|------------------|----------------|-------------------------|-----------|-----------|
|                  |                  |                | X                       | Y         | Z         |
| 1                | 6                | 0              | -2.806642               | -2.397507 | -0.384062 |
| 2                | 6                | 0              | -1.436160               | -2.213617 | -0.183386 |
| 3                | 6                | 0              | -0.860321               | -0.981187 | -0.502775 |
| 4                | 6                | 0              | -1.631059               | 0.046059  | -1.032191 |
| 5                | 6                | 0              | -2.998432               | -0.141261 | -1.232251 |
| 6                | 6                | 0              | -3.582200               | -1.359900 | -0.902151 |
| 7                | 1                | 0              | -3.285773               | -3.338812 | -0.139356 |
| 8                | 1                | 0              | 0.198901                | -0.838231 | -0.309363 |
| 9                | 1                | 0              | -1.168890               | 0.996297  | -1.279946 |
| 10               | 1                | 0              | -3.605248               | 0.660648  | -1.640179 |
| 11               | 1                | 0              | -4.647095               | -1.512166 | -1.049484 |
| 12               | 6                | 0              | -0.490266               | -3.255884 | 0.434430  |
| 13               | 8                | 0              | 0.417403                | -2.831583 | 1.192740  |
| 14               | 6                | 0              | -1.218802               | -4.515930 | 0.951105  |
| 15               | 9                | 0              | -0.370558               | -5.429761 | 1.430352  |
| 16               | 9                | 0              | -2.039957               | -4.166527 | 1.952073  |
| 17               | 9                | 0              | -1.973995               | -5.145803 | 0.028632  |
| 18               | 6                | 0              | 0.312832                | -3.829216 | -1.161792 |
| 19               | 7                | 0              | 1.563825                | -3.369794 | -1.413869 |
| 20               | 7                | 0              | -0.219564               | -3.929297 | -2.393130 |
| 21               | 6                | 0              | 1.675214                | -3.133656 | -2.773808 |
| 22               | 6                | 0              | 2.669571                | -2.944861 | -0.529390 |
| 23               | 7                | 0              | 0.596678                | -3.484657 | -3.398497 |
| 24               | 6                | 0              | -1.531156               | -4.326082 | -2.741180 |
| 25               | 6                | 0              | 2.877871                | -2.498447 | -3.426379 |
| 26               | 6                | 0              | 3.912618                | -2.785820 | -1.419999 |
| 27               | 1                | 0              | 2.376134                | -1.975581 | -0.110656 |
| 28               | 6                | 0              | 3.261278                | -3.802521 | 0.569733  |
| 29               | 6                | 0              | -2.407793               | -3.385863 | -3.272428 |
| 30               | 6                | 0              | -1.947125               | -5.641872 | -2.584558 |
| 31               | 1                | 0              | 2.531986                | -1.742824 | -4.132819 |
| 32               | 1                | 0              | 3.441073                | -3.266452 | -3.973672 |
| 33               | 8                | 0              | 3.698103                | -1.869679 | -2.463614 |
| 34               | 1                | 0              | 4.133781                | -3.777282 | -1.849998 |
| 35               | 6                | 0              | 5.008630                | -2.467478 | -0.414806 |
| 36               | 6                | 0              | 4.620921                | -3.457863 | 0.664932  |
| 37               | 6                | 0              | 2.704737                | -4.734253 | 1.430478  |
| 38               | 6                | 0              | -3.704722               | -3.745258 | -3.604530 |
| 39               | 9                | 0              | -2.016984               | -2.130712 | -3.426817 |
| 40               | 6                | 0              | -3.242532               | -6.009951 | -2.915084 |
| 41               | 9                | 0              | -1.119574               | -6.545478 | -2.080370 |
| 42               | 1                | 0              | 6.013770                | -2.619319 | -0.811146 |
| 43               | 1                | 0              | 4.916676                | -1.430038 | -0.070235 |
| 44               | 6                | 0              | 5.429166                | -4.040126 | 1.630706  |
| 45               | 1                | 0              | 1.654123                | -4.973861 | 1.372127  |

|    |   |   |           |           |           |
|----|---|---|-----------|-----------|-----------|
| 46 | 6 | 0 | 3.526194  | -5.329531 | 2.389907  |
| 47 | 6 | 0 | -4.117265 | -5.059834 | -3.428018 |
| 48 | 9 | 0 | -4.552436 | -2.835430 | -4.072431 |
| 49 | 9 | 0 | -3.646332 | -7.265066 | -2.751645 |
| 50 | 1 | 0 | 6.480380  | -3.776831 | 1.700308  |
| 51 | 6 | 0 | 4.871803  | -4.982568 | 2.495927  |
| 52 | 1 | 0 | 3.106616  | -6.066668 | 3.066927  |
| 53 | 9 | 0 | -5.356363 | -5.409903 | -3.741924 |
| 54 | 1 | 0 | 5.492353  | -5.453021 | 3.252017  |

-----  
**Re-TS1'**

| Center<br>Number | Atomic<br>Number | Atomic<br>Type | Coordinates (Angstroms) |           |           |
|------------------|------------------|----------------|-------------------------|-----------|-----------|
|                  |                  |                | X                       | Y         | Z         |
| 1                | 6                | 0              | -2.351961               | -2.950384 | -0.859546 |
| 2                | 6                | 0              | -1.266111               | -3.735757 | -1.256644 |
| 3                | 6                | 0              | -1.257031               | -4.281646 | -2.541003 |
| 4                | 6                | 0              | -2.288497               | -4.016697 | -3.434147 |
| 5                | 6                | 0              | -3.365141               | -3.222978 | -3.038654 |
| 6                | 6                | 0              | -3.396859               | -2.699834 | -1.749100 |
| 7                | 1                | 0              | -2.399930               | -2.525397 | 0.136643  |
| 8                | 1                | 0              | -0.416481               | -4.899974 | -2.841384 |
| 9                | 1                | 0              | -2.255205               | -4.429301 | -4.437361 |
| 10               | 1                | 0              | -4.172426               | -3.013328 | -3.733036 |
| 11               | 1                | 0              | -4.235295               | -2.087886 | -1.430792 |
| 12               | 6                | 0              | -0.091408               | -4.101658 | -0.351148 |
| 13               | 8                | 0              | 0.282486                | -5.297074 | -0.299796 |
| 14               | 6                | 0              | -0.159325               | -3.442682 | 1.058532  |
| 15               | 9                | 0              | -1.193672               | -3.957055 | 1.734365  |
| 16               | 9                | 0              | -0.316350               | -2.102747 | 1.055998  |
| 17               | 9                | 0              | 0.951378                | -3.698601 | 1.761846  |
| 18               | 6                | 0              | 1.310005                | -2.974721 | -0.962965 |
| 19               | 7                | 0              | 2.589762                | -3.178558 | -0.587089 |
| 20               | 7                | 0              | 1.274016                | -1.653275 | -1.189300 |
| 21               | 6                | 0              | 3.227027                | -1.953795 | -0.509664 |
| 22               | 6                | 0              | 3.291298                | -4.400709 | -0.170326 |
| 23               | 7                | 0              | 2.440585                | -0.997546 | -0.900658 |
| 24               | 6                | 0              | 0.169777                | -0.941119 | -1.711263 |
| 25               | 6                | 0              | 4.628132                | -1.785725 | 0.028671  |
| 26               | 6                | 0              | 4.787383                | -4.054484 | -0.143406 |
| 27               | 1                | 0              | 2.934400                | -4.644952 | 0.836640  |
| 28               | 6                | 0              | 3.351844                | -5.648510 | -1.025802 |
| 29               | 6                | 0              | -0.472460               | 0.037468  | -0.960961 |
| 30               | 6                | 0              | -0.293702               | -1.243748 | -2.988266 |
| 31               | 1                | 0              | 4.632681                | -0.964074 | 0.746093  |
| 32               | 1                | 0              | 5.309019                | -1.541093 | -0.797595 |
| 33               | 8                | 0              | 5.054404                | -2.959339 | 0.695840  |
| 34               | 1                | 0              | 5.073109                | -3.790970 | -1.175580 |
| 35               | 6                | 0              | 5.431408                | -5.399159 | 0.168521  |
| 36               | 6                | 0              | 4.589556                | -6.260226 | -0.757825 |
| 37               | 6                | 0              | 2.458231                | -6.206240 | -1.925124 |
| 38               | 6                | 0              | -1.596444               | 0.675570  | -1.465598 |
| 39               | 9                | 0              | -0.025578               | 0.359774  | 0.244016  |
| 40               | 6                | 0              | -1.423478               | -0.620032 | -3.491918 |
| 41               | 9                | 0              | 0.336670                | -2.147305 | -3.727361 |
| 42               | 1                | 0              | 6.498463                | -5.430465 | -0.056627 |
| 43               | 1                | 0              | 5.282208                | -5.659736 | 1.223376  |
| 44               | 6                | 0              | 4.925671                | -7.456635 | -1.374973 |
| 45               | 1                | 0              | 1.497100                | -5.739682 | -2.098668 |
| 46               | 6                | 0              | 2.809001                | -7.402134 | -2.554289 |

|    |   |   |           |           |           |
|----|---|---|-----------|-----------|-----------|
| 47 | 6 | 0 | -2.073659 | 0.338327  | -2.725573 |
| 48 | 9 | 0 | -2.222959 | 1.598643  | -0.744366 |
| 49 | 9 | 0 | -1.887676 | -0.934871 | -4.694961 |
| 50 | 1 | 0 | 5.882534  | -7.930148 | -1.176860 |
| 51 | 6 | 0 | 4.023630  | -8.026273 | -2.275926 |
| 52 | 1 | 0 | 2.123245  | -7.851869 | -3.264995 |
| 53 | 9 | 0 | -3.159471 | 0.932518  | -3.199726 |
| 54 | 1 | 0 | 4.276241  | -8.957369 | -2.773147 |

-----  
**Si-INT1'**  
 -----

| Center<br>Number | Atomic<br>Number | Atomic<br>Type | Coordinates (Angstroms) |           |           |
|------------------|------------------|----------------|-------------------------|-----------|-----------|
|                  |                  |                | X                       | Y         | Z         |
| 1                | 6                | 0              | -2.935748               | -2.584992 | -0.472867 |
| 2                | 6                | 0              | -1.603611               | -2.300653 | -0.166114 |
| 3                | 6                | 0              | -1.155840               | -0.980000 | -0.256985 |
| 4                | 6                | 0              | -2.004346               | 0.033113  | -0.685676 |
| 5                | 6                | 0              | -3.328105               | -0.259690 | -1.012728 |
| 6                | 6                | 0              | -3.791303               | -1.565728 | -0.894885 |
| 7                | 1                | 0              | -3.324885               | -3.594164 | -0.399456 |
| 8                | 1                | 0              | -0.131501               | -0.766615 | 0.033650  |
| 9                | 1                | 0              | -1.636587               | 1.051638  | -0.760806 |
| 10               | 1                | 0              | -3.995818               | 0.527566  | -1.347829 |
| 11               | 1                | 0              | -4.824834               | -1.800552 | -1.131140 |
| 12               | 6                | 0              | -0.531585               | -3.319262 | 0.329365  |
| 13               | 8                | 0              | 0.223368                | -2.857169 | 1.285336  |
| 14               | 6                | 0              | -1.184699               | -4.670381 | 0.715555  |
| 15               | 9                | 0              | -0.259777               | -5.569852 | 1.082308  |
| 16               | 9                | 0              | -2.022850               | -4.504700 | 1.739957  |
| 17               | 9                | 0              | -1.887079               | -5.265425 | -0.279322 |
| 18               | 6                | 0              | 0.376888                | -3.591150 | -0.968686 |
| 19               | 7                | 0              | 1.694534                | -3.290481 | -1.019789 |
| 20               | 7                | 0              | 0.022263                | -3.777351 | -2.248982 |
| 21               | 6                | 0              | 2.036085                | -3.217859 | -2.361357 |
| 22               | 6                | 0              | 2.686527                | -2.827574 | -0.000787 |
| 23               | 7                | 0              | 1.037117                | -3.529538 | -3.124575 |
| 24               | 6                | 0              | -1.247270               | -4.086965 | -2.803835 |
| 25               | 6                | 0              | 3.363577                | -2.725309 | -2.877285 |
| 26               | 6                | 0              | 4.049269                | -2.769153 | -0.720077 |
| 27               | 1                | 0              | 2.357168                | -1.823569 | 0.283208  |
| 28               | 6                | 0              | 3.116448                | -3.582952 | 1.251677  |
| 29               | 6                | 0              | -2.034537               | -3.063700 | -3.318303 |
| 30               | 6                | 0              | -1.661768               | -5.407352 | -2.929804 |
| 31               | 1                | 0              | 3.177618                | -2.079645 | -3.736222 |
| 32               | 1                | 0              | 3.977474                | -3.578498 | -3.195583 |
| 33               | 8                | 0              | 4.020151                | -1.977412 | -1.879350 |
| 34               | 1                | 0              | 4.311928                | -3.803294 | -0.998790 |
| 35               | 6                | 0              | 4.996695                | -2.343300 | 0.385902  |
| 36               | 6                | 0              | 4.456210                | -3.224250 | 1.490591  |
| 37               | 6                | 0              | 2.454848                | -4.425521 | 2.133181  |
| 38               | 6                | 0              | -3.265991               | -3.348086 | -3.887400 |
| 39               | 9                | 0              | -1.631848               | -1.807958 | -3.223001 |
| 40               | 6                | 0              | -2.887064               | -5.701208 | -3.506824 |
| 41               | 9                | 0              | -0.901332               | -6.388222 | -2.469465 |
| 42               | 1                | 0              | 6.045022                | -2.529707 | 0.147551  |
| 43               | 1                | 0              | 4.866483                | -1.276792 | 0.607349  |
| 44               | 6                | 0              | 5.135354                | -3.701393 | 2.602694  |
| 45               | 1                | 0              | 1.413610                | -4.654562 | 1.979734  |
| 46               | 6                | 0              | 3.148590                | -4.917904 | 3.240026  |
| 47               | 6                | 0              | -3.684087               | -4.668719 | -3.987565 |

|    |   |   |           |           |           |
|----|---|---|-----------|-----------|-----------|
| 48 | 9 | 0 | -4.041984 | -2.366149 | -4.330503 |
| 49 | 9 | 0 | -3.293764 | -6.960411 | -3.618396 |
| 50 | 1 | 0 | 6.170291  | -3.420789 | 2.774484  |
| 51 | 6 | 0 | 4.472974  | -4.558376 | 3.480175  |
| 52 | 1 | 0 | 2.639656  | -5.584253 | 3.929365  |
| 53 | 9 | 0 | -4.855084 | -4.948159 | -4.538953 |
| 54 | 1 | 0 | 4.991344  | -4.948085 | 4.350618  |

-----  
**Re-INT1'**  
 -----

| Center<br>Number | Atomic<br>Number | Atomic<br>Type | Coordinates (Angstroms) |           |           |
|------------------|------------------|----------------|-------------------------|-----------|-----------|
|                  |                  |                | X                       | Y         | Z         |
| 1                | 6                | 0              | -2.365838               | -3.053053 | -1.044986 |
| 2                | 6                | 0              | -1.186439               | -3.718813 | -1.392403 |
| 3                | 6                | 0              | -1.015853               | -4.138011 | -2.712916 |
| 4                | 6                | 0              | -1.967753               | -3.848836 | -3.684520 |
| 5                | 6                | 0              | -3.132121               | -3.165539 | -3.336854 |
| 6                | 6                | 0              | -3.331741               | -2.781247 | -2.013566 |
| 7                | 1                | 0              | -2.544398               | -2.726261 | -0.027147 |
| 8                | 1                | 0              | -0.108700               | -4.673837 | -2.976617 |
| 9                | 1                | 0              | -1.804166               | -4.159444 | -4.711637 |
| 10               | 1                | 0              | -3.879125               | -2.939455 | -4.091018 |
| 11               | 1                | 0              | -4.240517               | -2.259402 | -1.729433 |
| 12               | 6                | 0              | -0.040147               | -4.094531 | -0.421123 |
| 13               | 8                | 0              | 0.348333                | -5.335246 | -0.470026 |
| 14               | 6                | 0              | -0.415715               | -3.728231 | 1.051681  |
| 15               | 9                | 0              | -1.472507               | -4.436006 | 1.452028  |
| 16               | 9                | 0              | -0.706224               | -2.420907 | 1.253303  |
| 17               | 9                | 0              | 0.603813                | -4.012036 | 1.878486  |
| 18               | 6                | 0              | 1.186604                | -3.084757 | -0.653289 |
| 19               | 7                | 0              | 2.462258                | -3.373937 | -0.329744 |
| 20               | 7                | 0              | 1.174862                | -1.755736 | -0.822434 |
| 21               | 6                | 0              | 3.128986                | -2.168063 | -0.196251 |
| 22               | 6                | 0              | 3.141040                | -4.641751 | 0.039433  |
| 23               | 7                | 0              | 2.368348                | -1.168688 | -0.525144 |
| 24               | 6                | 0              | 0.111832                | -0.963402 | -1.325356 |
| 25               | 6                | 0              | 4.512420                | -2.042354 | 0.394181  |
| 26               | 6                | 0              | 4.633466                | -4.296826 | 0.198042  |
| 27               | 1                | 0              | 2.703833                | -4.948999 | 0.994451  |
| 28               | 6                | 0              | 3.290829                | -5.846695 | -0.878934 |
| 29               | 6                | 0              | -0.587400               | -0.092466 | -0.498681 |
| 30               | 6                | 0              | -0.216705               | -1.052089 | -2.674940 |
| 31               | 1                | 0              | 4.505270                | -1.216377 | 1.106356  |
| 32               | 1                | 0              | 5.241008                | -1.827287 | -0.398399 |
| 33               | 8                | 0              | 4.852289                | -3.228199 | 1.082402  |
| 34               | 1                | 0              | 5.000720                | -4.007126 | -0.800515 |
| 35               | 6                | 0              | 5.250110                | -5.649312 | 0.516225  |
| 36               | 6                | 0              | 4.503944                | -6.464558 | -0.522698 |
| 37               | 6                | 0              | 2.497812                | -6.377956 | -1.884622 |
| 38               | 6                | 0              | -1.663735               | 0.623909  | -1.002589 |
| 39               | 9                | 0              | -0.239779               | 0.058386  | 0.769486  |
| 40               | 6                | 0              | -1.299988               | -0.352650 | -3.179599 |
| 41               | 9                | 0              | 0.493717                | -1.831933 | -3.477543 |
| 42               | 1                | 0              | 6.333727                | -5.668939 | 0.391318  |
| 43               | 1                | 0              | 5.002859                | -5.953421 | 1.540512  |
| 44               | 6                | 0              | 4.916138                | -7.629347 | -1.154621 |
| 45               | 1                | 0              | 1.542873                | -5.921441 | -2.106182 |
| 46               | 6                | 0              | 2.927691                | -7.539234 | -2.529184 |
| 47               | 6                | 0              | -2.021972               | 0.484307  | -2.337525 |
| 48               | 9                | 0              | -2.345114               | 1.448664  | -0.216373 |

|    |   |   |           |           |           |
|----|---|---|-----------|-----------|-----------|
| 49 | 9 | 0 | -1.643629 | -0.472548 | -4.455265 |
| 50 | 1 | 0 | 5.854455  | -8.101216 | -0.878706 |
| 51 | 6 | 0 | 4.117489  | -8.166216 | -2.164552 |
| 52 | 1 | 0 | 2.317805  | -7.963927 | -3.320243 |
| 53 | 9 | 0 | -3.056703 | 1.159692  | -2.813503 |
| 54 | 1 | 0 | 4.429337  | -9.072141 | -2.674727 |

---
